# Supplementary material for: Acoustic Similarity Predicts Vowel Phoneme Detection in an Unfamiliar Regional Accent: Evidence from Monolinguals, Bilinguals and Second-Language Learners
Source: MDPI journal article supplement (doi:10.3390/languages9020062), 2024-02-14
Supplement: s1 [file s1]

R version 4.1.2 (2021-11-01) -- "Bird Hippie"  
 Copyright (C) 2021 The R Foundation for Statistical Computing  
 Platform: x86\_64-w64-mingw32/x64 (64-bit)

R is free software and comes with ABSOLUTELY NO WARRANTY.  
 You are welcome to redistribute it under certain conditions.  
 Type 'license()' or 'licence()' for distribution details.

Natural language support but running in an English locale

R is a collaborative project with many contributors.  
 Type 'contributors()' for more information and  
 'citation()' on how to cite R or R packages in publications.

Type 'demo()' for some demos, 'help()' for on-line help, or  
 'help.start()' for an HTML browser interface to help.  
 Type 'q()' to quit R.

[Previously saved workspace restored]

```
> summary(training_AusE, prob=0.89)
Family: categorical
Links: mudress = logit; muface = logit; mufleece = logit; mufoot = logit; mugoat = logit; mugoose = logit; mukit = logit; mulot = log
it; mumouth = logit; munurse = logit; mupalm = logit; muprice = logit; mustrut = logit; muthought = logit; mutrap = logit
Formula: vowel_name ~ duration_logRS + F1_DCT0RS + F1_DCT1RS + F1_DCT2RS + F2_DCT0RS + F2_DCT1RS + F2_DCT2RS + F3_DCT0RS + F3_DCT1RS +
F3_DCT2RS
Data: AusE (Number of observations: 957)
Draws: 4 chains, each with iter = 4000; warmup = 1000; thin = 1;
       total post-warmup draws = 12000
```

Population-Level Effects:

|                        | Estimate | Est.Error | 1-89% CI | u-89% CI | Rhat | Bulk_ESS | Tail_ESS |
|------------------------|----------|-----------|----------|----------|------|----------|----------|
| mudress_Intercept      | -0.39    | 1.50      | -2.74    | 2.04     | 1.00 | 3362     | 5768     |
| muface_Intercept       | -5.73    | 2.55      | -9.90    | -2.00    | 1.00 | 5121     | 6450     |
| mufleece_Intercept     | -20.77   | 4.96      | -29.01   | -13.33   | 1.00 | 5722     | 7091     |
| mufoot_Intercept       | -9.59    | 3.11      | -14.84   | -4.86    | 1.00 | 5060     | 6766     |
| mugoat_Intercept       | 3.47     | 1.17      | 1.71     | 5.48     | 1.00 | 2765     | 4789     |
| mugoose_Intercept      | -3.96    | 2.14      | -7.48    | -0.71    | 1.00 | 4735     | 6420     |
| mukit_Intercept        | -17.64   | 4.71      | -25.74   | -10.72   | 1.00 | 5485     | 6798     |
| mulot_Intercept        | 1.99     | 1.39      | -0.17    | 4.26     | 1.00 | 2934     | 5245     |
| mumouth_Intercept      | -7.42    | 2.40      | -11.38   | -3.72    | 1.00 | 5023     | 7153     |
| munurse_Intercept      | 4.08     | 1.24      | 2.21     | 6.16     | 1.00 | 2644     | 4829     |
| mupalm_Intercept       | -7.53    | 2.34      | -11.39   | -3.86    | 1.00 | 4804     | 7964     |
| muprice_Intercept      | -8.56    | 2.40      | -12.53   | -4.94    | 1.00 | 4726     | 6789     |
| mustrut_Intercept      | -5.01    | 1.97      | -8.23    | -1.95    | 1.00 | 4295     | 5879     |
| muthought_Intercept    | -9.20    | 3.21      | -14.58   | -4.38    | 1.00 | 5273     | 6185     |
| mutrap_Intercept       | -9.91    | 2.30      | -13.70   | -6.33    | 1.00 | 4511     | 7253     |
| mudress_duration_logRS | -9.64    | 1.92      | -12.73   | -6.64    | 1.00 | 6089     | 8073     |
| mudress_F1_DCT0RS      | 10.74    | 3.28      | 5.95     | 16.29    | 1.00 | 3885     | 3980     |
| mudress_F1_DCT1RS      | -4.25    | 1.60      | -6.86    | -1.73    | 1.00 | 7265     | 7762     |

|                         |        |      |        |        |      |       |       |
|-------------------------|--------|------|--------|--------|------|-------|-------|
| mudress_F1_DCT2RS       | -0.21  | 1.03 | -1.83  | 1.43   | 1.00 | 9303  | 9137  |
| mudress_F2_DCT0RS       | 18.13  | 3.39 | 12.84  | 23.66  | 1.00 | 4728  | 6943  |
| mudress_F2_DCT1RS       | 16.29  | 2.45 | 12.43  | 20.22  | 1.00 | 3123  | 5183  |
| mudress_F2_DCT2RS       | -1.30  | 0.97 | -2.89  | 0.22   | 1.00 | 9383  | 8595  |
| mudress_F3_DCT0RS       | -1.90  | 1.16 | -3.82  | -0.10  | 1.00 | 6339  | 8373  |
| mudress_F3_DCT1RS       | -0.25  | 0.96 | -1.79  | 1.27   | 1.00 | 6598  | 8231  |
| mudress_F3_DCT2RS       | 0.21   | 0.89 | -1.19  | 1.65   | 1.00 | 7772  | 8682  |
| muface_duration_logRS   | -0.97  | 1.69 | -3.78  | 1.58   | 1.00 | 14063 | 8755  |
| muface_F1_DCT0RS        | 2.49   | 2.89 | -1.29  | 7.63   | 1.00 | 5328  | 4358  |
| muface_F1_DCT1RS        | 10.04  | 2.08 | 6.89   | 13.53  | 1.00 | 6468  | 7185  |
| muface_F1_DCT2RS        | 2.83   | 1.17 | 1.02   | 4.80   | 1.00 | 8720  | 8831  |
| muface_F2_DCT0RS        | 19.70  | 4.52 | 13.00  | 27.30  | 1.00 | 5222  | 6048  |
| muface_F2_DCT1RS        | 13.51  | 2.29 | 9.96   | 17.30  | 1.00 | 3736  | 6238  |
| muface_F2_DCT2RS        | 1.22   | 1.01 | -0.37  | 2.88   | 1.00 | 8503  | 8763  |
| muface_F3_DCT0RS        | -2.80  | 1.66 | -5.63  | -0.33  | 1.00 | 7713  | 7615  |
| muface_F3_DCT1RS        | -2.81  | 1.25 | -4.83  | -0.86  | 1.00 | 8103  | 8178  |
| muface_F3_DCT2RS        | 0.36   | 1.19 | -1.50  | 2.29   | 1.00 | 11317 | 8677  |
| mufleece_duration_logRS | 0.71   | 1.61 | -1.73  | 3.39   | 1.00 | 9702  | 8248  |
| mufleece_F1_DCT0RS      | -24.50 | 5.52 | -33.63 | -16.18 | 1.00 | 4442  | 6710  |
| mufleece_F1_DCT1RS      | 5.68   | 2.11 | 2.34   | 9.13   | 1.00 | 6949  | 8393  |
| mufleece_F1_DCT2RS      | 1.80   | 1.46 | -0.39  | 4.25   | 1.00 | 10415 | 8822  |
| mufleece_F2_DCT0RS      | 26.79  | 6.16 | 17.37  | 36.95  | 1.00 | 5209  | 6971  |
| mufleece_F2_DCT1RS      | 20.51  | 3.11 | 15.80  | 25.67  | 1.00 | 3707  | 7074  |
| mufleece_F2_DCT2RS      | -0.22  | 0.98 | -1.79  | 1.36   | 1.00 | 8419  | 8533  |
| mufleece_F3_DCT0RS      | 2.88   | 2.04 | -0.12  | 6.40   | 1.00 | 10675 | 8903  |
| mufleece_F3_DCT1RS      | -4.38  | 1.69 | -7.18  | -1.78  | 1.00 | 7261  | 8055  |
| mufleece_F3_DCT2RS      | -0.93  | 1.54 | -3.47  | 1.45   | 1.00 | 13071 | 9105  |
| mufoot_duration_logRS   | -4.19  | 1.92 | -7.37  | -1.19  | 1.00 | 6384  | 8007  |
| mufoot_F1_DCT0RS        | -30.56 | 5.86 | -40.19 | -21.69 | 1.00 | 3838  | 6057  |
| mufoot_F1_DCT1RS        | -1.80  | 2.00 | -5.33  | 1.03   | 1.00 | 8672  | 6913  |
| mufoot_F1_DCT2RS        | -1.41  | 1.30 | -3.58  | 0.56   | 1.00 | 8555  | 8829  |
| mufoot_F2_DCT0RS        | -13.67 | 3.57 | -19.49 | -8.11  | 1.00 | 3705  | 5715  |
| mufoot_F2_DCT1RS        | 13.41  | 2.67 | 9.29   | 17.81  | 1.00 | 2921  | 6297  |
| mufoot_F2_DCT2RS        | 1.33   | 1.18 | -0.49  | 3.27   | 1.00 | 10599 | 9146  |
| mufoot_F3_DCT0RS        | 5.90   | 2.18 | 2.58   | 9.61   | 1.00 | 6273  | 6979  |
| mufoot_F3_DCT1RS        | 1.75   | 1.88 | -1.04  | 4.97   | 1.00 | 12632 | 8475  |
| mufoot_F3_DCT2RS        | -0.06  | 2.04 | -3.30  | 3.16   | 1.00 | 14569 | 8061  |
| mugoat_duration_logRS   | -0.29  | 1.15 | -2.15  | 1.52   | 1.00 | 12430 | 9331  |
| mugoat_F1_DCT0RS        | 1.20   | 2.27 | -1.90  | 5.13   | 1.00 | 4860  | 4156  |
| mugoat_F1_DCT1RS        | 4.31   | 1.34 | 2.23   | 6.52   | 1.00 | 7417  | 8291  |
| mugoat_F1_DCT2RS        | 0.42   | 0.81 | -0.85  | 1.73   | 1.00 | 9629  | 9072  |
| mugoat_F2_DCT0RS        | 2.39   | 2.34 | -0.85  | 6.49   | 1.00 | 4834  | 6490  |
| mugoat_F2_DCT1RS        | 7.82   | 1.64 | 5.36   | 10.60  | 1.00 | 3411  | 5145  |
| mugoat_F2_DCT2RS        | 0.54   | 0.84 | -0.76  | 1.92   | 1.00 | 10414 | 10058 |
| mugoat_F3_DCT0RS        | -1.89  | 1.01 | -3.58  | -0.32  | 1.00 | 7926  | 8227  |
| mugoat_F3_DCT1RS        | -0.14  | 0.86 | -1.52  | 1.21   | 1.00 | 7139  | 7827  |
| mugoat_F3_DCT2RS        | -0.26  | 0.98 | -1.85  | 1.29   | 1.00 | 10164 | 9939  |
| mugoose_duration_logRS  | 0.73   | 1.42 | -1.45  | 3.08   | 1.00 | 9130  | 8917  |
| mugoose_F1_DCT0RS       | -21.75 | 4.73 | -29.57 | -14.60 | 1.00 | 4169  | 5184  |
| mugoose_F1_DCT1RS       | 0.22   | 1.50 | -2.17  | 2.62   | 1.00 | 8286  | 9155  |
| mugoose_F1_DCT2RS       | -1.26  | 1.32 | -3.46  | 0.77   | 1.00 | 10559 | 8703  |

|                        |        |      |        |        |      |       |      |
|------------------------|--------|------|--------|--------|------|-------|------|
| mugoose_F2_DCT0RS      | 6.34   | 3.95 | 0.62   | 13.06  | 1.00 | 4748  | 6530 |
| mugoose_F2_DCT1RS      | 11.50  | 2.43 | 7.74   | 15.47  | 1.00 | 3204  | 6253 |
| mugoose_F2_DCT2RS      | 1.25   | 0.98 | -0.28  | 2.87   | 1.00 | 7910  | 7776 |
| mugoose_F3_DCT0RS      | -0.38  | 1.36 | -2.61  | 1.79   | 1.00 | 9689  | 8639 |
| mugoose_F3_DCT1RS      | -0.61  | 1.36 | -2.84  | 1.47   | 1.00 | 8729  | 8970 |
| mugoose_F3_DCT2RS      | 0.83   | 1.37 | -1.31  | 3.04   | 1.00 | 12743 | 9685 |
| mukit_duration_logRS   | -15.89 | 3.04 | -20.92 | -11.23 | 1.00 | 7015  | 7230 |
| mukit_F1_DCT0RS        | -5.71  | 4.89 | -14.54 | 0.51   | 1.00 | 5074  | 6971 |
| mukit_F1_DCT1RS        | -2.82  | 2.09 | -6.39  | 0.25   | 1.00 | 8744  | 8555 |
| mukit_F1_DCT2RS        | -0.62  | 1.63 | -3.34  | 1.87   | 1.00 | 12625 | 9291 |
| mukit_F2_DCT0RS        | 33.21  | 6.70 | 23.09  | 44.52  | 1.00 | 5291  | 6277 |
| mukit_F2_DCT1RS        | 24.57  | 3.56 | 19.14  | 30.47  | 1.00 | 3767  | 7080 |
| mukit_F2_DCT2RS        | -1.21  | 1.25 | -3.27  | 0.70   | 1.00 | 10634 | 8772 |
| mukit_F3_DCT0RS        | -0.30  | 1.70 | -3.07  | 2.32   | 1.00 | 11689 | 8700 |
| mukit_F3_DCT1RS        | -2.71  | 1.90 | -5.95  | 0.09   | 1.00 | 8634  | 8075 |
| mukit_F3_DCT2RS        | -0.35  | 1.48 | -2.82  | 1.95   | 1.00 | 13550 | 9576 |
| mulot_duration_logRS   | -3.07  | 1.64 | -5.76  | -0.55  | 1.00 | 5828  | 8516 |
| mulot_F1_DCT0RS        | 2.94   | 3.11 | -1.22  | 8.53   | 1.00 | 3748  | 4232 |
| mulot_F1_DCT1RS        | -2.05  | 1.54 | -4.70  | 0.25   | 1.00 | 8542  | 7306 |
| mulot_F1_DCT2RS        | -0.63  | 1.00 | -2.23  | 0.95   | 1.00 | 7977  | 9034 |
| mulot_F2_DCT0RS        | -10.31 | 3.00 | -15.19 | -5.65  | 1.00 | 3651  | 5523 |
| mulot_F2_DCT1RS        | 9.72   | 2.45 | 5.93   | 13.79  | 1.00 | 3044  | 6179 |
| mulot_F2_DCT2RS        | 0.09   | 1.01 | -1.52  | 1.69   | 1.00 | 10692 | 9459 |
| mulot_F3_DCT0RS        | 3.13   | 1.31 | 1.10   | 5.29   | 1.00 | 5387  | 7759 |
| mulot_F3_DCT1RS        | -1.96  | 1.20 | -3.93  | -0.09  | 1.00 | 7598  | 8302 |
| mulot_F3_DCT2RS        | -0.48  | 1.28 | -2.61  | 1.50   | 1.00 | 11825 | 8783 |
| mumouth_duration_logRS | -0.02  | 1.65 | -2.61  | 2.60   | 1.00 | 7394  | 8466 |
| mumouth_F1_DCT0RS      | 24.28  | 4.91 | 16.88  | 32.42  | 1.00 | 3939  | 4687 |
| mumouth_F1_DCT1RS      | -3.53  | 1.42 | -5.84  | -1.37  | 1.00 | 6853  | 8072 |
| mumouth_F1_DCT2RS      | -1.87  | 1.16 | -3.76  | -0.04  | 1.00 | 8375  | 9208 |
| mumouth_F2_DCT0RS      | -1.80  | 2.73 | -6.74  | 1.92   | 1.00 | 5304  | 5765 |
| mumouth_F2_DCT1RS      | 22.49  | 2.74 | 18.22  | 26.91  | 1.00 | 3258  | 5915 |
| mumouth_F2_DCT2RS      | -1.02  | 0.95 | -2.57  | 0.47   | 1.00 | 8114  | 8859 |
| mumouth_F3_DCT0RS      | -2.41  | 1.22 | -4.38  | -0.51  | 1.00 | 5504  | 8360 |
| mumouth_F3_DCT1RS      | -2.23  | 0.99 | -3.85  | -0.71  | 1.00 | 5425  | 7048 |
| mumouth_F3_DCT2RS      | 0.13   | 0.80 | -1.12  | 1.42   | 1.00 | 6044  | 7448 |
| munurse_duration_logRS | 1.86   | 1.51 | -0.43  | 4.37   | 1.00 | 7911  | 8960 |
| munurse_F1_DCT0RS      | 2.66   | 2.74 | -0.98  | 7.64   | 1.00 | 4022  | 3784 |
| munurse_F1_DCT1RS      | -4.89  | 1.68 | -7.61  | -2.29  | 1.00 | 7538  | 8400 |
| munurse_F1_DCT2RS      | 0.83   | 1.01 | -0.77  | 2.49   | 1.00 | 9101  | 9092 |
| munurse_F2_DCT0RS      | 4.56   | 2.76 | 0.43   | 9.14   | 1.00 | 4203  | 7040 |
| munurse_F2_DCT1RS      | 12.63  | 2.49 | 8.70   | 16.66  | 1.00 | 3505  | 6622 |
| munurse_F2_DCT2RS      | -1.73  | 1.05 | -3.46  | -0.08  | 1.00 | 10447 | 9021 |
| munurse_F3_DCT0RS      | 1.37   | 1.14 | -0.43  | 3.24   | 1.00 | 7346  | 8401 |
| munurse_F3_DCT1RS      | -0.82  | 0.98 | -2.42  | 0.71   | 1.00 | 6984  | 8042 |
| munurse_F3_DCT2RS      | -0.11  | 0.96 | -1.68  | 1.39   | 1.00 | 9187  | 8881 |
| mupalm_duration_logRS  | 3.62   | 1.77 | 0.86   | 6.51   | 1.00 | 7207  | 9030 |
| mupalm_F1_DCT0RS       | 27.56  | 4.79 | 20.29  | 35.58  | 1.00 | 3759  | 5089 |
| mupalm_F1_DCT1RS       | -0.43  | 1.36 | -2.70  | 1.68   | 1.00 | 8874  | 8383 |
| mupalm_F1_DCT2RS       | 1.89   | 1.17 | 0.08   | 3.81   | 1.00 | 8524  | 8937 |
| mupalm_F2_DCT0RS       | -12.80 | 3.33 | -18.32 | -7.68  | 1.00 | 4690  | 6209 |

|                          |        |      |        |        |      |       |      |
|--------------------------|--------|------|--------|--------|------|-------|------|
| mupalm_F2_DCT1RS         | 10.85  | 2.65 | 6.62   | 15.07  | 1.00 | 3830  | 6010 |
| mupalm_F2_DCT2RS         | 0.23   | 0.99 | -1.34  | 1.83   | 1.00 | 8666  | 8258 |
| mupalm_F3_DCT0RS         | 0.62   | 1.19 | -1.24  | 2.53   | 1.00 | 6679  | 8841 |
| mupalm_F3_DCT1RS         | 0.40   | 0.90 | -1.02  | 1.84   | 1.00 | 5466  | 6759 |
| mupalm_F3_DCT2RS         | 1.29   | 0.81 | 0.04   | 2.63   | 1.00 | 5983  | 7467 |
| muprice_duration_logRS   | -1.53  | 1.78 | -4.48  | 1.14   | 1.00 | 8158  | 8697 |
| muprice_F1_DCT0RS        | 34.26  | 5.22 | 26.45  | 42.95  | 1.00 | 3657  | 4661 |
| muprice_F1_DCT1RS        | 4.49   | 1.60 | 1.96   | 7.09   | 1.00 | 7001  | 8854 |
| muprice_F1_DCT2RS        | 0.37   | 1.11 | -1.35  | 2.18   | 1.00 | 9120  | 8878 |
| muprice_F2_DCT0RS        | -1.95  | 2.68 | -6.74  | 1.67   | 1.00 | 5714  | 6549 |
| muprice_F2_DCT1RS        | -1.90  | 2.26 | -5.79  | 1.36   | 1.00 | 4852  | 6468 |
| muprice_F2_DCT2RS        | 1.73   | 1.08 | 0.09   | 3.52   | 1.00 | 7540  | 7745 |
| muprice_F3_DCT0RS        | -1.66  | 1.29 | -3.81  | 0.32   | 1.00 | 7719  | 8461 |
| muprice_F3_DCT1RS        | 1.73   | 0.98 | 0.18   | 3.32   | 1.00 | 6142  | 8427 |
| muprice_F3_DCT2RS        | 0.67   | 0.89 | -0.73  | 2.13   | 1.00 | 6819  | 8586 |
| mustrut_duration_logRS   | -10.72 | 1.85 | -13.70 | -7.82  | 1.00 | 5528  | 7768 |
| mustrut_F1_DCT0RS        | 28.57  | 4.51 | 21.73  | 36.16  | 1.00 | 3495  | 4355 |
| mustrut_F1_DCT1RS        | 1.20   | 1.31 | -0.84  | 3.30   | 1.00 | 7307  | 8325 |
| mustrut_F1_DCT2RS        | -3.12  | 1.06 | -4.86  | -1.45  | 1.00 | 7218  | 8641 |
| mustrut_F2_DCT0RS        | -3.31  | 2.77 | -8.26  | 0.52   | 1.00 | 4297  | 5608 |
| mustrut_F2_DCT1RS        | 13.32  | 2.65 | 9.09   | 17.54  | 1.00 | 3337  | 5476 |
| mustrut_F2_DCT2RS        | 1.04   | 0.93 | -0.42  | 2.55   | 1.00 | 7504  | 8083 |
| mustrut_F3_DCT0RS        | -0.74  | 1.10 | -2.54  | 0.97   | 1.00 | 5721  | 7670 |
| mustrut_F3_DCT1RS        | -1.69  | 0.95 | -3.24  | -0.21  | 1.00 | 5567  | 6631 |
| mustrut_F3_DCT2RS        | 0.51   | 0.80 | -0.74  | 1.81   | 1.00 | 6117  | 7453 |
| muthought_duration_logRS | 4.68   | 2.27 | 1.22   | 8.40   | 1.00 | 6687  | 8774 |
| muthought_F1_DCT0RS      | -7.77  | 4.96 | -16.15 | -0.49  | 1.00 | 4158  | 7056 |
| muthought_F1_DCT1RS      | -3.70  | 2.40 | -7.90  | -0.33  | 1.00 | 8986  | 7853 |
| muthought_F1_DCT2RS      | 2.11   | 1.68 | -0.36  | 4.97   | 1.00 | 10193 | 9515 |
| muthought_F2_DCT0RS      | -21.57 | 4.35 | -28.66 | -14.83 | 1.00 | 4200  | 7051 |
| muthought_F2_DCT1RS      | 8.77   | 2.86 | 4.32   | 13.47  | 1.00 | 3271  | 6518 |
| muthought_F2_DCT2RS      | 0.67   | 1.31 | -1.34  | 2.81   | 1.00 | 11479 | 8709 |
| muthought_F3_DCT0RS      | 7.45   | 2.46 | 3.71   | 11.53  | 1.00 | 6002  | 6822 |
| muthought_F3_DCT1RS      | -3.56  | 2.74 | -8.22  | 0.48   | 1.00 | 11566 | 9373 |
| muthought_F3_DCT2RS      | -2.21  | 2.76 | -7.23  | 1.53   | 1.00 | 12527 | 6778 |
| mutrap_duration_logRS    | -10.33 | 1.91 | -13.38 | -7.28  | 1.00 | 5630  | 7524 |
| mutrap_F1_DCT0RS         | 37.43  | 4.94 | 30.00  | 45.68  | 1.00 | 3521  | 4410 |
| mutrap_F1_DCT1RS         | -0.57  | 1.28 | -2.64  | 1.41   | 1.00 | 7155  | 7956 |
| mutrap_F1_DCT2RS         | 0.11   | 1.05 | -1.55  | 1.80   | 1.00 | 8122  | 8991 |
| mutrap_F2_DCT0RS         | 9.01   | 3.23 | 3.62   | 13.98  | 1.00 | 4750  | 6249 |
| mutrap_F2_DCT1RS         | 16.59  | 2.74 | 12.24  | 21.01  | 1.00 | 3422  | 6020 |
| mutrap_F2_DCT2RS         | 0.07   | 0.88 | -1.32  | 1.49   | 1.00 | 7379  | 8251 |
| mutrap_F3_DCT0RS         | -5.95  | 1.21 | -7.93  | -4.09  | 1.00 | 5212  | 6870 |
| mutrap_F3_DCT1RS         | -1.88  | 0.92 | -3.37  | -0.46  | 1.00 | 4969  | 5959 |
| mutrap_F3_DCT2RS         | -0.72  | 0.79 | -1.97  | 0.55   | 1.00 | 5862  | 6821 |

Draws were sampled using sampling(NUTS). For each parameter, Bulk\_ESS and Tail\_ESS are effective sample size measures, and Rhat is the potential scale reduction factor on split chains (at convergence, Rhat = 1).

>
