# Supplementary material for: Acoustic Similarity Predicts Vowel Phoneme Detection in an Unfamiliar Regional Accent: Evidence from Monolinguals, Bilinguals and Second-Language Learners
Source: MDPI journal article supplement (doi:10.3390/languages9020062), 2024-02-14
Supplement: s1 [file s1]

Archive with 7 entries (7 files):
- 1. Full Descriptions of Statistical Models (Experiments 1 and 2).pdf
- 2. Full Summary of Experiment 1 Multinomial Logistic Regression.pdf
- 3. Full Summary of Experiment 1 Probit Regression.pdf
- 4. Full Summary of Experiment 2 Multinomial Logistic Regression.pdf
- 5. Full Summary of Experiment 2 Probit Regression.pdf
- 6. Experiment 1 Trial Data.csv
- 7. Experiment 2 Trial Data.csv
