# Supplementary material for: Acoustic Similarity Predicts Vowel Phoneme Detection in an Unfamiliar Regional Accent: Evidence from Monolinguals, Bilinguals and Second-Language Learners
Source: MDPI journal article supplement (doi:10.3390/languages9020062), 2024-02-14
Supplement: s1 [file s1 › 2. Full Summary of Experiment 1 Multinomial Logistic Regression.pdf]

R version 4.1.2 (2021-11-01) -- "Bird Hippie"  
 Copyright (C) 2021 The R Foundation for Statistical Computing  
 Platform: x86\_64-w64-mingw32/x64 (64-bit)

R is free software and comes with ABSOLUTELY NO WARRANTY.  
 You are welcome to redistribute it under certain conditions.  
 Type 'license()' or 'licence()' for distribution details.

Natural language support but running in an English locale

R is a collaborative project with many contributors.  
 Type 'contributors()' for more information and  
 'citation()' on how to cite R or R packages in publications.

Type 'demo()' for some demos, 'help()' for on-line help, or  
 'help.start()' for an HTML browser interface to help.  
 Type 'q()' to quit R.

[Previously saved workspace restored]

```
> summary(training_S.Eng, prob=0.89)
```

Family: categorical

Links: mudress = logit; muface = logit; mufleece = logit; mufoot = logit; mugoat = logit; mugoose = logit; mukit = logit; mulot = logit; mumouth = logit; munurse = logit; mupalm = logit; muprice = logit; mustrut = logit; muthought = logit; mutrap = logit

Formula: vowel\_name ~ duration\_logRS + F1\_DCT0RS + F1\_DCT1RS + F1\_DCT2RS + F2\_DCT0RS + F2\_DCT1RS + F2\_DCT2RS + F3\_DCT0RS + F3\_DCT1RS + F3\_DCT2RS

Data: S.Eng (Number of observations: 800)

Draws: 4 chains, each with iter = 4000; warmup = 1000; thin = 1;  
 total post-warmup draws = 12000

Population-Level Effects:

|                        | Estimate | Est.Error | 1-89% CI | u-89% CI | Rhat | Bulk_ESS | Tail_ESS |
|------------------------|----------|-----------|----------|----------|------|----------|----------|
| mudress_Intercept      | -1.54    | 2.64      | -5.71    | 2.64     | 1.00 | 3621     | 4672     |
| muface_Intercept       | -21.61   | 9.28      | -37.98   | -8.82    | 1.00 | 2629     | 3945     |
| mufleece_Intercept     | -47.45   | 13.97     | -71.36   | -28.11   | 1.00 | 2737     | 3745     |
| mufoot_Intercept       | 0.41     | 2.41      | -3.38    | 4.22     | 1.00 | 3458     | 4520     |
| mugoat_Intercept       | 3.87     | 1.96      | 0.99     | 7.13     | 1.00 | 3157     | 3469     |
| mugoose_Intercept      | -20.98   | 9.98      | -38.40   | -7.82    | 1.00 | 2532     | 3428     |
| mukit_Intercept        | -4.14    | 3.16      | -9.27    | 0.77     | 1.00 | 3196     | 4858     |
| mulot_Intercept        | -22.75   | 9.25      | -38.98   | -10.46   | 1.00 | 3149     | 4114     |
| mumouth_Intercept      | -31.86   | 13.24     | -55.05   | -14.56   | 1.00 | 3137     | 4029     |
| munurse_Intercept      | 1.42     | 2.74      | -2.97    | 5.68     | 1.00 | 3811     | 4017     |
| mupalm_Intercept       | -28.60   | 13.11     | -52.18   | -11.16   | 1.00 | 2422     | 3614     |
| muprice_Intercept      | -0.60    | 2.49      | -4.70    | 3.20     | 1.00 | 5262     | 6965     |
| mustrut_Intercept      | -0.91    | 2.86      | -5.50    | 3.59     | 1.00 | 5004     | 6508     |
| muthought_Intercept    | -96.01   | 80.92     | -247.14  | -31.23   | 1.00 | 1190     | 1181     |
| mutrap_Intercept       | -15.75   | 4.85      | -24.08   | -8.68    | 1.00 | 4981     | 7079     |
| mudress_duration_logRS | -15.14   | 6.35      | -25.62   | -5.34    | 1.00 | 2121     | 4268     |
| mudress_F1_DCT0RS      | 42.64    | 10.07     | 27.57    | 59.91    | 1.00 | 1815     | 3424     |
| mudress_F1_DCT1RS      | -1.14    | 2.08      | -4.66    | 1.90     | 1.00 | 9040     | 7172     |

|                         |        |       |        |        |      |       |      |
|-------------------------|--------|-------|--------|--------|------|-------|------|
| mudress_F1_DCT2RS       | -0.95  | 1.56  | -3.57  | 1.37   | 1.00 | 9421  | 7874 |
| mudress_F2_DCT0RS       | 25.76  | 6.90  | 15.37  | 37.20  | 1.00 | 4311  | 5532 |
| mudress_F2_DCT1RS       | 7.50   | 6.17  | -0.17  | 18.70  | 1.00 | 2729  | 3483 |
| mudress_F2_DCT2RS       | -0.93  | 1.87  | -4.04  | 1.88   | 1.00 | 10221 | 7185 |
| mudress_F3_DCT0RS       | -1.34  | 1.77  | -4.34  | 1.28   | 1.00 | 7361  | 7485 |
| mudress_F3_DCT1RS       | 0.30   | 1.21  | -1.68  | 2.21   | 1.00 | 9011  | 8821 |
| mudress_F3_DCT2RS       | 0.12   | 1.36  | -2.04  | 2.28   | 1.00 | 8905  | 9004 |
| muface_duration_logRS   | 7.59   | 5.18  | 0.52   | 16.70  | 1.00 | 5876  | 6042 |
| muface_F1_DCT0RS        | 21.50  | 10.56 | 4.15   | 38.74  | 1.00 | 2497  | 5573 |
| muface_F1_DCT1RS        | 8.56   | 4.20  | 2.46   | 15.80  | 1.00 | 4619  | 4886 |
| muface_F1_DCT2RS        | 2.46   | 2.64  | -1.17  | 7.19   | 1.00 | 8855  | 7380 |
| muface_F2_DCT0RS        | 67.95  | 19.66 | 40.05  | 102.37 | 1.00 | 2664  | 4146 |
| muface_F2_DCT1RS        | 9.34   | 4.65  | 2.29   | 17.01  | 1.00 | 2963  | 3749 |
| muface_F2_DCT2RS        | 2.11   | 1.84  | -0.51  | 5.29   | 1.00 | 8770  | 7315 |
| muface_F3_DCT0RS        | 1.05   | 2.00  | -1.93  | 4.38   | 1.00 | 8031  | 7696 |
| muface_F3_DCT1RS        | -2.40  | 1.85  | -5.54  | 0.37   | 1.00 | 7295  | 7316 |
| muface_F3_DCT2RS        | -2.00  | 1.94  | -5.27  | 0.89   | 1.00 | 8267  | 7050 |
| mufleece_duration_logRS | 0.23   | 2.88  | -4.18  | 4.90   | 1.00 | 6560  | 5941 |
| mufleece_F1_DCT0RS      | -18.77 | 14.42 | -43.38 | 0.11   | 1.00 | 2436  | 4470 |
| mufleece_F1_DCT1RS      | 5.93   | 5.23  | -0.48  | 15.37  | 1.00 | 5369  | 5120 |
| mufleece_F1_DCT2RS      | 0.54   | 2.73  | -3.49  | 5.01   | 1.00 | 11556 | 6122 |
| mufleece_F2_DCT0RS      | 75.93  | 20.83 | 46.22  | 112.19 | 1.00 | 2857  | 4376 |
| mufleece_F2_DCT1RS      | 1.87   | 4.61  | -3.93  | 10.24  | 1.00 | 8417  | 5366 |
| mufleece_F2_DCT2RS      | 3.37   | 2.07  | 0.41   | 6.93   | 1.00 | 6910  | 7441 |
| mufleece_F3_DCT0RS      | -2.26  | 2.80  | -7.24  | 1.44   | 1.00 | 5409  | 4501 |
| mufleece_F3_DCT1RS      | 0.45   | 2.32  | -3.05  | 4.24   | 1.00 | 12042 | 6936 |
| mufleece_F3_DCT2RS      | 0.61   | 2.09  | -2.53  | 4.13   | 1.00 | 10994 | 7802 |
| mufoot_duration_logRS   | -24.06 | 6.61  | -35.34 | -14.28 | 1.00 | 2089  | 3921 |
| mufoot_F1_DCT0RS        | -4.77  | 5.46  | -14.60 | 2.07   | 1.00 | 2439  | 4885 |
| mufoot_F1_DCT1RS        | -4.75  | 2.61  | -9.26  | -0.96  | 1.00 | 5644  | 7062 |
| mufoot_F1_DCT2RS        | -0.75  | 1.79  | -3.72  | 1.97   | 1.00 | 10358 | 7121 |
| mufoot_F2_DCT0RS        | -18.31 | 7.20  | -29.96 | -6.73  | 1.00 | 2920  | 4317 |
| mufoot_F2_DCT1RS        | 17.57  | 5.67  | 9.34   | 27.13  | 1.00 | 2662  | 3842 |
| mufoot_F2_DCT2RS        | -1.06  | 2.26  | -5.07  | 2.14   | 1.00 | 13235 | 7668 |
| mufoot_F3_DCT0RS        | -1.68  | 1.67  | -4.48  | 0.82   | 1.00 | 9935  | 8655 |
| mufoot_F3_DCT1RS        | -0.25  | 1.88  | -3.28  | 2.69   | 1.00 | 11497 | 7833 |
| mufoot_F3_DCT2RS        | -1.90  | 2.15  | -5.71  | 1.08   | 1.00 | 9475  | 7393 |
| mugoat_duration_logRS   | 0.76   | 2.28  | -2.66  | 4.57   | 1.00 | 4952  | 5681 |
| mugoat_F1_DCT0RS        | 1.75   | 3.99  | -3.54  | 8.99   | 1.00 | 3414  | 4478 |
| mugoat_F1_DCT1RS        | 5.53   | 2.33  | 2.02   | 9.45   | 1.00 | 6304  | 7384 |
| mugoat_F1_DCT2RS        | 1.71   | 1.59  | -0.58  | 4.48   | 1.00 | 8323  | 7220 |
| mugoat_F2_DCT0RS        | 3.60   | 4.57  | -1.78  | 12.16  | 1.00 | 3811  | 3823 |
| mugoat_F2_DCT1RS        | 10.28  | 3.41  | 5.64   | 16.16  | 1.00 | 2367  | 2836 |
| mugoat_F2_DCT2RS        | -1.78  | 1.51  | -4.38  | 0.38   | 1.00 | 7852  | 6884 |
| mugoat_F3_DCT0RS        | -0.62  | 1.56  | -3.22  | 1.77   | 1.00 | 8422  | 7886 |
| mugoat_F3_DCT1RS        | 2.56   | 1.78  | -0.00  | 5.67   | 1.00 | 9478  | 6371 |
| mugoat_F3_DCT2RS        | 0.31   | 1.65  | -2.22  | 3.00   | 1.00 | 9086  | 8132 |
| mugoose_duration_logRS  | -3.99  | 3.40  | -10.02 | 0.60   | 1.00 | 4926  | 6040 |
| mugoose_F1_DCT0RS       | -33.64 | 12.42 | -55.11 | -16.36 | 1.00 | 2280  | 4121 |
| mugoose_F1_DCT1RS       | 0.30   | 2.89  | -4.11  | 4.97   | 1.00 | 10210 | 6859 |
| mugoose_F1_DCT2RS       | 0.77   | 2.46  | -2.88  | 4.92   | 1.00 | 12195 | 7136 |

|                        |        |       |         |        |      |       |      |
|------------------------|--------|-------|---------|--------|------|-------|------|
| mugoose_F2_DCT0RS      | 18.44  | 11.80 | 1.71    | 38.74  | 1.00 | 2522  | 3591 |
| mugoose_F2_DCT1RS      | 8.04   | 5.27  | 0.91    | 17.42  | 1.00 | 3826  | 4728 |
| mugoose_F2_DCT2RS      | 0.29   | 1.72  | -2.41   | 3.10   | 1.00 | 9615  | 7660 |
| mugoose_F3_DCT0RS      | -8.73  | 4.43  | -16.43  | -2.52  | 1.00 | 3377  | 4196 |
| mugoose_F3_DCT1RS      | 1.41   | 2.65  | -2.16   | 6.10   | 1.00 | 11528 | 6859 |
| mugoose_F3_DCT2RS      | -2.46  | 2.35  | -6.57   | 0.83   | 1.00 | 9876  | 7177 |
| mukit_duration_logRS   | -20.58 | 6.61  | -31.88  | -10.59 | 1.00 | 2105  | 4355 |
| mukit_F1_DCT0RS        | 6.95   | 6.19  | -1.07   | 17.92  | 1.00 | 2596  | 5800 |
| mukit_F1_DCT1RS        | -2.68  | 2.38  | -6.84   | 0.72   | 1.00 | 6179  | 6340 |
| mukit_F1_DCT2RS        | 0.25   | 1.84  | -2.63   | 3.23   | 1.00 | 11872 | 8540 |
| mukit_F2_DCT0RS        | 22.45  | 8.63  | 9.27    | 37.00  | 1.00 | 3275  | 5310 |
| mukit_F2_DCT1RS        | 6.15   | 5.55  | -0.60   | 16.47  | 1.00 | 3281  | 3437 |
| mukit_F2_DCT2RS        | 0.10   | 1.64  | -2.49   | 2.71   | 1.00 | 11253 | 8029 |
| mukit_F3_DCT0RS        | 1.54   | 1.96  | -1.35   | 4.88   | 1.00 | 9946  | 7710 |
| mukit_F3_DCT1RS        | -1.74  | 1.66  | -4.62   | 0.64   | 1.00 | 8008  | 7344 |
| mukit_F3_DCT2RS        | -2.14  | 1.77  | -5.17   | 0.45   | 1.00 | 7690  | 6311 |
| mulot_duration_logRS   | -10.20 | 8.30  | -24.40  | 0.90   | 1.00 | 1895  | 4827 |
| mulot_F1_DCT0RS        | 5.27   | 7.99  | -3.36   | 20.81  | 1.00 | 2306  | 3965 |
| mulot_F1_DCT1RS        | -1.48  | 2.47  | -5.73   | 1.93   | 1.00 | 10048 | 6308 |
| mulot_F1_DCT2RS        | -0.45  | 2.09  | -3.88   | 2.74   | 1.00 | 10170 | 7793 |
| mulot_F2_DCT0RS        | -82.04 | 20.89 | -119.09 | -53.82 | 1.00 | 2627  | 3948 |
| mulot_F2_DCT1RS        | 41.63  | 10.96 | 25.55   | 60.53  | 1.00 | 2635  | 4639 |
| mulot_F2_DCT2RS        | 3.24   | 3.19  | -1.03   | 8.89   | 1.00 | 9432  | 7613 |
| mulot_F3_DCT0RS        | -0.02  | 2.10  | -3.32   | 3.25   | 1.00 | 12081 | 8105 |
| mulot_F3_DCT1RS        | -1.92  | 2.61  | -6.56   | 1.63   | 1.00 | 10364 | 7374 |
| mulot_F3_DCT2RS        | 2.63   | 2.35  | -0.63   | 6.77   | 1.00 | 9037  | 7933 |
| mumouth_duration_logRS | 2.09   | 5.24  | -3.90   | 11.67  | 1.00 | 4472  | 3697 |
| mumouth_F1_DCT0RS      | 52.38  | 15.92 | 28.98   | 79.68  | 1.00 | 2708  | 4583 |
| mumouth_F1_DCT1RS      | 7.80   | 5.68  | 0.36    | 17.81  | 1.00 | 6611  | 6561 |
| mumouth_F1_DCT2RS      | 0.43   | 2.60  | -3.56   | 4.72   | 1.00 | 12223 | 7609 |
| mumouth_F2_DCT0RS      | -4.04  | 8.11  | -19.82  | 3.61   | 1.00 | 5389  | 3616 |
| mumouth_F2_DCT1RS      | 78.05  | 23.00 | 46.40   | 117.95 | 1.00 | 2571  | 4211 |
| mumouth_F2_DCT2RS      | -7.05  | 6.84  | -19.61  | 0.60   | 1.00 | 5993  | 5290 |
| mumouth_F3_DCT0RS      | -0.17  | 2.94  | -4.82   | 4.35   | 1.00 | 12691 | 7115 |
| mumouth_F3_DCT1RS      | -3.17  | 2.92  | -8.20   | 0.83   | 1.00 | 7770  | 7136 |
| mumouth_F3_DCT2RS      | 0.85   | 2.72  | -2.94   | 5.44   | 1.00 | 9646  | 5160 |
| munurse_duration_logRS | 10.76  | 6.70  | 1.21    | 22.48  | 1.00 | 3214  | 5158 |
| munurse_F1_DCT0RS      | 30.62  | 10.50 | 14.74   | 48.24  | 1.00 | 1930  | 4179 |
| munurse_F1_DCT1RS      | -3.46  | 3.84  | -10.67  | 1.16   | 1.00 | 7220  | 6387 |
| munurse_F1_DCT2RS      | 1.57   | 1.93  | -1.26   | 4.80   | 1.00 | 10514 | 8100 |
| munurse_F2_DCT0RS      | -0.57  | 3.70  | -6.65   | 4.74   | 1.00 | 9784  | 5222 |
| munurse_F2_DCT1RS      | 11.65  | 6.64  | 2.28    | 23.17  | 1.00 | 2602  | 3610 |
| munurse_F2_DCT2RS      | -3.21  | 2.46  | -7.44   | 0.31   | 1.00 | 11051 | 8333 |
| munurse_F3_DCT0RS      | 2.66   | 2.52  | -0.78   | 7.04   | 1.00 | 7557  | 7176 |
| munurse_F3_DCT1RS      | 0.48   | 1.76  | -2.19   | 3.40   | 1.00 | 11310 | 8897 |
| munurse_F3_DCT2RS      | -1.49  | 1.89  | -4.75   | 1.27   | 1.00 | 11694 | 7817 |
| mupalm_duration_logRS  | 21.82  | 11.07 | 5.35    | 40.71  | 1.00 | 1676  | 3432 |
| mupalm_F1_DCT0RS       | 28.16  | 14.41 | 6.09    | 52.29  | 1.00 | 2390  | 4663 |
| mupalm_F1_DCT1RS       | -1.21  | 3.33  | -6.98   | 3.20   | 1.00 | 11239 | 5508 |
| mupalm_F1_DCT2RS       | 0.49   | 2.55  | -3.31   | 4.66   | 1.00 | 11945 | 7358 |
| mupalm_F2_DCT0RS       | -86.03 | 24.69 | -130.21 | -52.91 | 1.00 | 2198  | 3248 |

|                          |         |       |         |        |      |       |      |
|--------------------------|---------|-------|---------|--------|------|-------|------|
| mupalm_F2_DCT1RS         | 25.11   | 11.45 | 7.95    | 44.45  | 1.00 | 2796  | 5497 |
| mupalm_F2_DCT2RS         | 0.14    | 2.52  | -3.77   | 4.19   | 1.00 | 11268 | 6409 |
| mupalm_F3_DCT0RS         | 4.16    | 3.79  | -0.71   | 11.01  | 1.00 | 9312  | 7001 |
| mupalm_F3_DCT1RS         | 0.33    | 2.41  | -3.28   | 4.27   | 1.00 | 11894 | 7292 |
| mupalm_F3_DCT2RS         | 0.00    | 2.55  | -3.98   | 4.02   | 1.00 | 11827 | 7184 |
| muprice_duration_logRS   | 0.43    | 2.93  | -3.89   | 5.25   | 1.00 | 6054  | 5629 |
| muprice_F1_DCT0RS        | 36.45   | 9.95  | 22.00   | 53.56  | 1.00 | 2118  | 3721 |
| muprice_F1_DCT1RS        | 4.17    | 2.44  | 0.61    | 8.30   | 1.00 | 6664  | 7652 |
| muprice_F1_DCT2RS        | -2.98   | 1.96  | -6.37   | -0.16  | 1.00 | 7229  | 8075 |
| muprice_F2_DCT0RS        | 0.01    | 3.08  | -4.82   | 4.81   | 1.00 | 9736  | 6597 |
| muprice_F2_DCT1RS        | -1.99   | 2.25  | -5.86   | 1.25   | 1.00 | 3552  | 5884 |
| muprice_F2_DCT2RS        | 0.25    | 1.48  | -2.08   | 2.60   | 1.00 | 11403 | 8673 |
| muprice_F3_DCT0RS        | 1.93    | 2.08  | -1.08   | 5.51   | 1.00 | 9470  | 7786 |
| muprice_F3_DCT1RS        | 0.27    | 1.28  | -1.75   | 2.30   | 1.00 | 11099 | 8983 |
| muprice_F3_DCT2RS        | -0.64   | 1.44  | -3.00   | 1.56   | 1.00 | 11451 | 8285 |
| mustrut_duration_logRS   | -19.91  | 6.69  | -31.24  | -9.77  | 1.00 | 2051  | 4164 |
| mustrut_F1_DCT0RS        | 35.41   | 10.13 | 20.65   | 52.81  | 1.00 | 1911  | 3582 |
| mustrut_F1_DCT1RS        | 0.36    | 1.70  | -2.28   | 3.15   | 1.00 | 8899  | 7298 |
| mustrut_F1_DCT2RS        | 0.03    | 1.41  | -2.22   | 2.28   | 1.00 | 9844  | 9029 |
| mustrut_F2_DCT0RS        | -22.74  | 7.31  | -34.72  | -11.53 | 1.00 | 3471  | 5100 |
| mustrut_F2_DCT1RS        | 24.09   | 7.75  | 12.42   | 36.92  | 1.00 | 2323  | 3556 |
| mustrut_F2_DCT2RS        | 1.18    | 1.93  | -1.72   | 4.40   | 1.00 | 11379 | 8695 |
| mustrut_F3_DCT0RS        | 0.83    | 1.59  | -1.64   | 3.40   | 1.00 | 8185  | 7876 |
| mustrut_F3_DCT1RS        | -0.35   | 1.41  | -2.63   | 1.87   | 1.00 | 9051  | 8805 |
| mustrut_F3_DCT2RS        | 1.51    | 1.50  | -0.78   | 4.00   | 1.00 | 8550  | 8271 |
| muthought_duration_logRS | 11.24   | 18.59 | -2.43   | 40.35  | 1.00 | 2174  | 1590 |
| muthought_F1_DCT0RS      | -48.21  | 62.19 | -155.53 | 0.42   | 1.00 | 1223  | 1481 |
| muthought_F1_DCT1RS      | -1.86   | 8.64  | -13.12  | 5.95   | 1.00 | 7148  | 2138 |
| muthought_F1_DCT2RS      | 5.63    | 15.70 | -4.13   | 28.79  | 1.00 | 3162  | 1202 |
| muthought_F2_DCT0RS      | -157.25 | 86.33 | -314.90 | -80.00 | 1.00 | 1266  | 1186 |
| muthought_F2_DCT1RS      | 38.05   | 22.49 | 1.86    | 74.97  | 1.00 | 2306  | 2259 |
| muthought_F2_DCT2RS      | 0.87    | 4.81  | -4.60   | 7.70   | 1.00 | 7032  | 3497 |
| muthought_F3_DCT0RS      | 0.40    | 4.45  | -5.62   | 6.92   | 1.00 | 10783 | 4795 |
| muthought_F3_DCT1RS      | -3.22   | 8.42  | -17.47  | 4.15   | 1.00 | 5509  | 2115 |
| muthought_F3_DCT2RS      | -1.00   | 6.81  | -9.78   | 6.09   | 1.00 | 9634  | 2949 |
| mutrap_duration_logRS    | -12.72  | 6.79  | -24.01  | -2.03  | 1.00 | 2273  | 4424 |
| mutrap_F1_DCT0RS         | 66.33   | 12.14 | 48.43   | 86.90  | 1.00 | 2129  | 3533 |
| mutrap_F1_DCT1RS         | -1.29   | 2.22  | -5.11   | 1.91   | 1.00 | 10872 | 8143 |
| mutrap_F1_DCT2RS         | -2.74   | 1.98  | -6.11   | 0.17   | 1.00 | 10513 | 8496 |
| mutrap_F2_DCT0RS         | 1.27    | 4.24  | -4.18   | 8.78   | 1.00 | 6452  | 4435 |
| mutrap_F2_DCT1RS         | 19.77   | 8.12  | 7.44    | 33.56  | 1.00 | 2606  | 3828 |
| mutrap_F2_DCT2RS         | -1.57   | 2.12  | -5.32   | 1.49   | 1.00 | 10284 | 7414 |
| mutrap_F3_DCT0RS         | -4.74   | 2.15  | -8.30   | -1.47  | 1.00 | 5903  | 6790 |
| mutrap_F3_DCT1RS         | 2.05    | 1.54  | -0.28   | 4.65   | 1.00 | 8220  | 7752 |
| mutrap_F3_DCT2RS         | -1.91   | 1.52  | -4.45   | 0.40   | 1.00 | 8377  | 9023 |

Draws were sampled using sampling(NUTS). For each parameter, Bulk\_ESS and Tail\_ESS are effective sample size measures, and Rhat is the potential scale reduction factor on split chains (at convergence, Rhat = 1).

>
