# Supplementary material for: Acoustic Similarity Predicts Vowel Phoneme Detection in an Unfamiliar Regional Accent: Evidence from Monolinguals, Bilinguals and Second-Language Learners
Source: MDPI journal article supplement (doi:10.3390/languages9020062), 2024-02-14
Supplement: s1 [file s1 › 5. Full Summary of Experiment 2 Probit Regression.pdf]

R version 4.1.2 (2021-11-01) -- "Bird Hippie"  
Copyright (C) 2021 The R Foundation for Statistical Computing  
Platform: x86\_64-w64-mingw32/x64 (64-bit)

R is free software and comes with ABSOLUTELY NO WARRANTY.  
You are welcome to redistribute it under certain conditions.  
Type 'license()' or 'licence()' for distribution details.

Natural language support but running in an English locale

R is a collaborative project with many contributors.  
Type 'contributors()' for more information and  
'citation()' on how to cite R or R packages in publications.

Type 'demo()' for some demos, 'help()' for on-line help, or  
'help.start()' for an HTML browser interface to help.  
Type 'q()' to quit R.

[Previously saved workspace restored]

```
> library(bayestestR)
> describe_posterior(Exp2.model,ci=0.89)
Summary of Posterior Distribution
```

| Parameter                    | Median   | 89% CI         | pd     | ROPE          | % in ROPE | Rhat  | ESS      |
|------------------------------|----------|----------------|--------|---------------|-----------|-------|----------|
| (Intercept)                  | 0.27     | [ 0.11, 0.44]  | 99.41% | [-0.10, 0.10] | 2.50%     | 1.001 | 2207.00  |
| ItemType1                    | 2.30     | [ 2.08, 2.51]  | 100%   | [-0.10, 0.10] | 0%        | 1.001 | 3018.00  |
| Similarity1                  | -0.06    | [-0.23, 0.11]  | 70.93% | [-0.10, 0.10] | 61.57%    | 1.002 | 2700.00  |
| Group1                       | -0.03    | [-0.33, 0.25]  | 56.88% | [-0.10, 0.10] | 44.03%    | 1.000 | 2203.00  |
| ItemType1:Similarity1        | -0.99    | [-1.32, -0.64] | 100%   | [-0.10, 0.10] | 0%        | 1.000 | 2570.00  |
| ItemType1:Group1             | -0.51    | [-0.80, -0.21] | 99.63% | [-0.10, 0.10] | 0%        | 1.000 | 4996.00  |
| Similarity1:Group1           | -0.02    | [-0.16, 0.10]  | 60.61% | [-0.10, 0.10] | 79.80%    | 1.000 | 12540.00 |
| ItemType1:Similarity1:Group1 | 2.91e-03 | [-0.30, 0.30]  | 50.72% | [-0.10, 0.10] | 43.28%    | 1.000 | 10619.00 |

```
>
>
>
> summary(Exp2.model,prob=0.89)
Family: bernoulli
Links: mu = probit
Formula: Sameness ~ ItemType * Similarity * Group + (1 + ItemType * Similarity | Participant) + (1 + Group | Item)
Data: Exp2 (Number of observations: 12480)
Draws: 4 chains, each with iter = 4000; warmup = 1000; thin = 1;
       total post-warmup draws = 12000
```

Group-Level Effects:

~Item (Number of levels: 320)

|               | Estimate | Est.Error | 1-89% CI | u-89% CI | Rhat | Bulk_ESS | Tail_ESS |
|---------------|----------|-----------|----------|----------|------|----------|----------|
| sd(Intercept) | 0.83     | 0.04      | 0.77     | 0.90     | 1.00 | 3455     | 6684     |
| sd(Group1)    | 0.26     | 0.06      | 0.16     | 0.36     | 1.00 | 3017     | 4169     |

```
cor(Intercept,Group1)      -0.49      0.17      -0.78      -0.23 1.00      4416      3788
```

```
~Participant (Number of levels: 39)
```

|                                        | Estimate | Est.Error | 1-89% CI | u-89% CI | Rhat | Bulk_ESS | Tail_ESS |
|----------------------------------------|----------|-----------|----------|----------|------|----------|----------|
| sd(Intercept)                          | 0.55     | 0.07      | 0.45     | 0.68     | 1.00 | 3708     | 5412     |
| sd(ItemType1)                          | 0.50     | 0.07      | 0.39     | 0.63     | 1.00 | 6150     | 8532     |
| sd(Similarity1)                        | 0.06     | 0.05      | 0.01     | 0.15     | 1.00 | 5140     | 6380     |
| sd(ItemType1:Similarity1)              | 0.30     | 0.11      | 0.12     | 0.49     | 1.00 | 3691     | 4030     |
| cor(Intercept,ItemType1)               | -0.23    | 0.18      | -0.49    | 0.07     | 1.00 | 4963     | 6489     |
| cor(Intercept,Similarity1)             | 0.11     | 0.40      | -0.58    | 0.72     | 1.00 | 17990    | 8287     |
| cor(ItemType1,Similarity1)             | 0.21     | 0.39      | -0.49    | 0.78     | 1.00 | 14070    | 9242     |
| cor(Intercept,ItemType1:Similarity1)   | 0.33     | 0.26      | -0.11    | 0.72     | 1.00 | 13545    | 8847     |
| cor(ItemType1,ItemType1:Similarity1)   | -0.29    | 0.27      | -0.70    | 0.15     | 1.00 | 12374    | 9704     |
| cor(Similarity1,ItemType1:Similarity1) | 0.13     | 0.43      | -0.61    | 0.76     | 1.00 | 3876     | 7009     |

```
Population-Level Effects:
```

|                              | Estimate | Est.Error | 1-89% CI | u-89% CI | Rhat | Bulk_ESS | Tail_ESS |
|------------------------------|----------|-----------|----------|----------|------|----------|----------|
| Intercept                    | 0.27     | 0.10      | 0.10     | 0.44     | 1.00 | 2220     | 4278     |
| ItemType1                    | 2.29     | 0.13      | 2.08     | 2.51     | 1.00 | 3008     | 5147     |
| Similarity1                  | -0.06    | 0.11      | -0.23    | 0.11     | 1.00 | 2714     | 5148     |
| Group1                       | -0.03    | 0.18      | -0.33    | 0.26     | 1.00 | 2229     | 4088     |
| ItemType1:Similarity1        | -0.98    | 0.22      | -1.33    | -0.64    | 1.00 | 2580     | 4867     |
| ItemType1:Group1             | -0.51    | 0.18      | -0.80    | -0.22    | 1.00 | 5020     | 7288     |
| Similarity1:Group1           | -0.02    | 0.08      | -0.15    | 0.11     | 1.00 | 12664    | 9041     |
| ItemType1:Similarity1:Group1 | 0.00     | 0.19      | -0.30    | 0.30     | 1.00 | 10734    | 9524     |

Draws were sampled using sampling(NUTS). For each parameter, Bulk\_ESS and Tail\_ESS are effective sample size measures, and Rhat is the potential scale reduction factor on split chains (at convergence, Rhat = 1).

```
>
```
