# Supplementary material for: Acoustic Similarity Predicts Vowel Phoneme Detection in an Unfamiliar Regional Accent: Evidence from Monolinguals, Bilinguals and Second-Language Learners
Source: MDPI journal article supplement (doi:10.3390/languages9020062), 2024-02-14
Supplement: s1 [file s1 › 6. Experiment 1 Trial Data.csv]

Participant	Trial	Item	Syllable1	Syllable2	ItemType	AcousticSimilarity	Similarity	Response	Sameness	Accuracy
G1	1	171	bipe	bope	Mismatching	0.02	Dissimilar	Different	0	Correct
G1	2	377	deek	dake	Mismatching	S.Eng	S.Eng	Different	0	Correct
G1	3	294	bowp	bope	Mismatching	0	Dissimilar	Different	0	Correct
G1	4	47	bawp	bipe	Mismatching	0.01	Dissimilar	Different	0	Correct
G1	5	270	faf	fuff	Mismatching	0	Dissimilar	Different	0	Correct
G1	6	343	durk	deek	Mismatching	S.Eng	S.Eng	Different	0	Correct
G1	7	350	fof	fif	Mismatching	S.Eng	S.Eng	Different	0	Correct
G1	8	34	fif	fuff	Mismatching	0.89	Similar	Same	1	Incorrect
G1	9	80	fuff	fuff	Matching	0	Dissimilar	Different	0	Incorrect
G1	10	269	faf	fuf	Mismatching	0.59	Similar	Different	0	Correct
G1	11	228	fif	fif	Matching	0.97	Similar	Same	1	Correct
G1	12	334	bowp	bope	Mismatching	S.Eng	S.Eng	Different	0	Correct
G1	13	206	bipe	bipe	Matching	1	Similar	Same	1	Correct
G1	14	362	bawp	barp	Mismatching	S.Eng	S.Eng	Different	0	Correct
G1	15	208	bope	bawp	Mismatching	0.45	Dissimilar	Different	0	Correct
G1	16	165	barp	bowp	Mismatching	0.94	Similar	Different	0	Correct
G1	17	95	bowp	bowp	Matching	0.9	Similar	Same	1	Correct
G1	18	132	bowp	bawp	Mismatching	0.9	Similar	Different	0	Correct
G1	19	371	bowp	barp	Mismatching	S.Eng	S.Eng	Different	0	Correct
G1	20	117	fuff	fif	Mismatching	0	Dissimilar	Different	0	Correct
G1	21	106	faf	faf	Matching	1	Similar	Same	1	Correct
G1	22	20	deek	deek	Matching	0.93	Similar	Same	1	Correct
G1	23	183	dook	dook	Matching	0.03	Dissimilar	Different	0	Incorrect
G1	24	14	bope	bowp	Mismatching	0.02	Dissimilar	Different	0	Correct
G1	25	234	fuf	fof	Mismatching	0.01	Dissimilar	Same	1	Incorrect
G1	26	18	dake	dook	Mismatching	1	Similar	Different	0	Correct
G1	27	331	bowp	barp	Mismatching	S.Eng	S.Eng	Different	0	Correct
G1	28	195	fof	fof	Matching	0	Dissimilar	Different	0	Incorrect
G1	29	288	bope	bawp	Mismatching	0.45	Dissimilar	Different	0	Correct
G1	30	9	bawp	bowp	Mismatching	0.01	Dissimilar	Different	0	Correct
G1	31	351	fof	fof	Matching	S.Eng	S.Eng	Different	0	Incorrect
G1	32	77	fof	fuff	Mismatching	0	Dissimilar	Different	0	Correct
G1	33	335	bowp	bowp	Matching	S.Eng	S.Eng	Same	1	Correct
G1	34	25	durk	durk	Matching	0.2	Dissimilar	Same	1	Correct
G1	35	300	dook	deek	Mismatching	0.44	Dissimilar	Different	0	Correct
G1	36	173	bope	bope	Matching	0.02	Dissimilar	Same	1	Correct
G1	37	286	bipe	bipe	Matching	1	Similar	Same	1	Correct
G1	38	332	bowp	bawp	Mismatching	S.Eng	S.Eng	Different	0	Correct
G1	39	225	durk	durk	Matching	0.99	Similar	Same	1	Correct
G1	40	71	fif	fif	Matching	0.89	Similar	Same	1	Correct
G1	41	13	bope	bope	Matching	0.02	Dissimilar	Same	1	Correct
G1	42	93	bowp	bipe	Mismatching	0.9	Similar	Different	0	Correct
G1	43	35	fof	fof	Matching	0	Dissimilar	Different	0	Incorrect
G1	44	291	bowp	barp	Mismatching	0.9	Similar	Different	0	Correct
G1	45	249	bawp	bowp	Mismatching	0.94	Similar	Different	0	Correct
G1	46	42	barp	bawp	Mismatching	0.15	Dissimilar	Different	0	Correct
G1	47	136	dake	dake	Matching	0.99	Similar	Same	1	Correct
G1	48	81	barp	barp	Matching	0.9	Similar	Same	1	Correct
G1	49	285	bipe	bawp	Mismatching	0.45	Dissimilar	Different	0	Correct
G1	50	322	bawp	barp	Mismatching	S.Eng	S.Eng	Different	0	Correct
G1	51	73	fif	fuf	Mismatching	0.89	Similar	Different	0	Correct
G1	52	185	durk	durk	Matching	0.2	Dissimilar	Different	0	Incorrect
G1	53	325	bipe	bawp	Mismatching	S.Eng	S.Eng	Different	0	Correct
G1	54	188	faf	fof	Mismatching	0	Dissimilar	Same	1	Incorrect
G1	55	167	bawp	bipe	Mismatching	0.85	Similar	Different	0	Correct
G1	56	207	bope	barp	Mismatching	0.9	Similar	Different	0	Correct
G1	57	88	bope	bawp	Mismatching	0	Dissimilar	Different	0	Correct
G1	58	303	durk	deek	Mismatching	0.44	Dissimilar	Different	0	Correct
G1	59	266	faf	faf	Matching	0.83	Similar	Same	1	Correct
G1	60	124	bipe	barp	Mismatching	1	Similar	Different	0	Correct
G1	61	74	fif	fuff	Mismatching	0.89	Similar	Same	1	Incorrect
G1	62	336	dake	dake	Matching	S.Eng	S.Eng	Same	1	Correct
G1	63	141	dook	dook	Matching	0	Dissimilar	Different	0	Incorrect
G1	64	181	deek	dook	Mismatching	0.03	Dissimilar	Different	0	Correct
G1	65	239	fuff	fuf	Mismatching	0.11	Dissimilar	Different	0	Correct
G1	66	278	fuf	fuf	Matching	0.59	Similar	Different	0	Incorrect
G1	67	178	dake	dook	Mismatching	0.03	Dissimilar	Different	0	Correct
G1	68	36	fof	fuf	Mismatching	0	Dissimilar	Same	1	Incorrect
G1	69	89	bope	bipe	Mismatching	0	Dissimilar	Different	0	Correct
G1	70	116	fuff	faf	Mismatching	0	Dissimilar	Different	0	Correct
G1	71	186	faf	faf	Matching	0.83	Similar	Same	1	Correct
G1	72	282	bawp	barp	Mismatching	0.9	Similar	Different	0	Correct
G1	73	268	faf	fof	Mismatching	0	Dissimilar	Same	1	Incorrect
G1	74	308	fif	fif	Matching	0.97	Similar	Same	1	Correct
G1	75	314	fuf	fof	Mismatching	0.01	Dissimilar	Same	1	Incorrect
G1	76	297	deek	dake	Mismatching	0.99	Similar	Different	0	Correct
G1	77	293	bowp	bipe	Mismatching	1	Similar	Different	0	Correct
G1	78	54	bope	bowp	Mismatching	0.02	Dissimilar	Different	0	Correct
G1	79	45	barp	bowp	Mismatching	0.15	Dissimilar	Different	0	Correct
G1	80	357	fuff	fif	Mismatching	S.Eng	S.Eng	Same	1	Incorrect
G1	81	43	barp	bipe	Mismatching	0.15	Dissimilar	Different	0	Correct
G1	82	23	dook	dook	Matching	0.03	Dissimilar	Different	0	Incorrect
G1	83	182	deek	durk	Mismatching	0.2	Dissimilar	Different	0	Correct
G1	84	230	fof	fif	Mismatching	0.97	Similar	Different	0	Correct
G1	85	290	bope	bope	Matching	0	Dissimilar	Same	1	Correct
G1	86	84	bipe	barp	Mismatching	1	Similar	Different	0	Correct
G1	87	7	bawp	bipe	Mismatching	0.01	Dissimilar	Different	0	Correct
G1	88	134	bowp	bope	Mismatching	0.9	Similar	Different	0	Correct
G1	89	99	dook	dake	Mismatching	0	Dissimilar	Different	0	Correct
G1	90	201	barp	barp	Matching	0.9	Similar	Same	1	Correct
G1	91	37	fof	fuff	Mismatching	0	Dissimilar	Different	0	Correct
G1	92	342	durk	dake	Mismatching	S.Eng	S.Eng	Different	0	Correct
G1	93	292	bowp	bawp	Mismatching	0.45	Dissimilar	Different	0	Correct
G1	94	75	fof	fof	Matching	0	Dissimilar	Different	0	Incorrect
G1	95	212	bowp	bawp	Mismatching	0.45	Dissimilar	Different	0	Correct
G1	96	85	bipe	bawp	Mismatching	1	Similar	Different	0	Correct
G1	97	218	deek	deek	Matching	0.44	Dissimilar	Same	1	Correct
G1	98	135	bowp	bowp	Matching	0.9	Similar	Same	1	Correct
G1	99	52	bipe	bowp	Mismatching	0.85	Similar	Different	0	Correct
G1	100	319	fuff	fuf	Mismatching	0.11	Dissimilar	Different	0	Correct
G1	101	251	bipe	bope	Mismatching	0.02	Dissimilar	Different	0	Correct
G1	102	271	fif	fif	Matching	0.89	Similar	Same	1	Correct
G1	103	356	fuff	faf	Mismatching	S.Eng	S.Eng	Different	0	Correct
G1	104	91	bowp	barp	Mismatching	0.9	Similar	Different	0	Correct
G1	105	214	bowp	bope	Mismatching	0	Dissimilar	Different	0	Correct
G1	106	210	bope	bope	Matching	0	Dissimilar	Same	1	Correct
G1	107	347	fif	faf	Mismatching	S.Eng	S.Eng	Different	0	Correct
G1	108	229	fof	faf	Mismatching	1	Similar	Different	0	Correct
G1	109	145	durk	durk	Matching	0.99	Similar	Same	1	Correct
G1	110	70	faf	fuff	Mismatching	0.83	Similar	Different	0	Correct
G1	111	252	bipe	bowp	Mismatching	0.94	Similar	Different	0	Correct
G1	112	267	faf	fif	Mismatching	0.89	Similar	Different	0	Correct
G1	113	175	bowp	bowp	Matching	0.94	Similar	Same	1	Correct
G1	114	44	barp	bope	Mismatching	0.15	Dissimilar	Different	0	Correct
G1	115	40	fuff	fuff	Matching	0	Dissimilar	Different	0	Incorrect
G1	116	263	dook	dook	Matching	0.03	Dissimilar	Same	1	Correct
G1	117	198	fuf	fuf	Matching	0.59	Similar	Different	0	Incorrect
G1	118	205	bipe	bawp	Mismatching	0.45	Dissimilar	Different	0	Correct
G1	119	287	bope	barp	Mismatching	0.9	Similar	Different	0	Correct
G1	120	90	bope	bope	Matching	0	Dissimilar	Same	1	Correct
G1	121	243	barp	bipe	Mismatching	0.85	Similar	Different	0	Correct
G1	122	168	bawp	bope	Mismatching	0.02	Dissimilar	Different	0	Correct
G1	123	194	fif	fuff	Mismatching	0	Dissimilar	Different	0	Correct
G1	124	184	dook	durk	Mismatching	0.2	Dissimilar	Different	0	Correct
G1	125	60	deek	deek	Matching	0.93	Similar	Same	1	Correct
G1	126	317	fuff	fif	Mismatching	0.97	Similar	Same	1	Incorrect
G1	127	96	dake	dake	Matching	0.99	Similar	Same	1	Correct
G1	128	154	fuf	fof	Mismatching	0.11	Dissimilar	Same	1	Incorrect
G1	129	398	fuff	fof	Mismatching	S.Eng	S.Eng	Different	0	Correct
G1	130	307	fif	faf	Mismatching	1	Similar	Different	0	Correct
G1	131	247	bawp	bipe	Mismatching	0.85	Similar	Different	0	Correct
G1	132	329	bope	bipe	Mismatching	S.Eng	S.Eng	Different	0	Correct
G1	133	253	bope	bope	Matching	0.02	Dissimilar	Same	1	Correct
G1	134	391	fof	fof	Matching	S.Eng	S.Eng	Same	1	Correct
G1	135	211	bowp	barp	Mismatching	0.9	Similar	Different	0	Correct
G1	136	33	fif	fuf	Mismatching	0.89	Similar	Different	0	Correct
G1	137	76	fof	fuf	Mismatching	0	Dissimilar	Same	1	Incorrect
G1	138	279	fuf	fuff	Mismatching	0	Dissimilar	Different	0	Correct
G1	139	180	deek	deek	Matching	0.93	Similar	Same	1	Correct
G1	140	245	barp	bowp	Mismatching	0.94	Similar	Different	0	Correct
G1	141	19	dake	durk	Mismatching	1	Similar	Different	0	Correct
G1	142	359	fuff	fuf	Mismatching	S.Eng	S.Eng	Different	0	Correct
G1	143	315	fuf	fuf	Matching	0.11	Dissimilar	Different	0	Incorrect
G1	144	66	faf	faf	Matching	0.83	Similar	Same	1	Correct
G1	145	301	dook	dook	Matching	0	Dissimilar	Different	0	Incorrect
G1	146	296	dake	dake	Matching	0.99	Similar	Same	1	Correct
G1	147	151	fof	fof	Matching	0.01	Dissimilar	Different	0	Incorrect
G1	148	349	fof	faf	Mismatching	S.Eng	S.Eng	Different	0	Correct
G1	149	272	fif	fof	Mismatching	0	Dissimilar	Different	0	Correct
G1	150	204	bipe	barp	Mismatching	0.9	Similar	Different	0	Correct
G1	151	166	bawp	bawp	Matching	0.01	Dissimilar	Different	0	Incorrect
G1	152	149	fof	faf	Mismatching	0.01	Dissimilar	Same	1	Incorrect
G1	153	121	barp	barp	Matching	0.9	Similar	Same	1	Correct
G1	154	277	fof	fuff	Mismatching	0	Dissimilar	Same	1	Incorrect
G1	155	305	durk	durk	Matching	0.99	Similar	Same	1	Correct
G1	156	313	fuf	fif	Mismatching	0.97	Similar	Different	0	Correct
G1	157	213	bowp	bipe	Mismatching	1	Similar	Different	0	Correct
G1	158	283	bawp	bawp	Matching	0.45	Dissimilar	Same	1	Correct
G1	159	110	fof	fif	Mismatching	0.01	Dissimilar	Different	0	Correct
G1	160	363	bawp	bawp	Matching	S.Eng	S.Eng	Same	1	Correct
G1	161	6	bawp	bawp	Matching	0.01	Dissimilar	Different	0	Incorrect
G1	162	137	deek	dake	Mismatching	0.44	Dissimilar	Different	0	Correct
G1	163	200	fuff	fuff	Matching	0	Dissimilar	Different	0	Incorrect
G1	164	97	deek	dake	Mismatching	0.44	Dissimilar	Different	0	Correct
G1	165	172	bipe	bowp	Mismatching	0.94	Similar	Different	0	Correct
G1	166	51	bipe	bope	Mismatching	0.85	Similar	Different	0	Correct
G1	167	219	dook	dake	Mismatching	0.99	Similar	Different	0	Correct
G1	168	364	bipe	barp	Mismatching	S.Eng	S.Eng	Different	0	Correct
G1	169	374	bowp	bope	Mismatching	S.Eng	S.Eng	Different	0	Correct
G1	170	21	deek	dook	Mismatching	0.93	Similar	Different	0	Correct
G1	171	158	fuff	fof	Mismatching	0	Dissimilar	Different	0	Correct
G1	172	3	barp	bipe	Mismatching	0.15	Dissimilar	Different	0	Correct
G1	173	104	durk	dook	Mismatching	0.99	Similar	Different	0	Correct
G1	174	130	bope	bope	Matching	0	Dissimilar	Same	1	Correct
G1	175	55	bowp	bowp	Matching	0.94	Similar	Same	1	Correct
G1	176	221	dook	dook	Matching	0	Dissimilar	Different	0	Incorrect
G1	177	107	fif	faf	Mismatching	0.97	Similar	Different	0	Correct
G1	178	340	dook	deek	Mismatching	S.Eng	S.Eng	Different	0	Correct
G1	179	144	durk	dook	Mismatching	0.99	Similar	Different	0	Correct
G1	180	289	bope	bipe	Mismatching	1	Similar	Different	0	Correct
G1	181	232	fuf	faf	Mismatching	1	Similar	Same	1	Incorrect
G1	182	58	dake	dook	Mismatching	1	Similar	Different	0	Correct
G1	183	46	bawp	bawp	Matching	0.01	Dissimilar	Different	0	Incorrect
G1	184	125	bipe	bawp	Mismatching	1	Similar	Different	0	Correct
G1	185	369	bope	bipe	Mismatching	S.Eng	S.Eng	Different	0	Correct
G1	186	262	deek	durk	Mismatching	0.2	Dissimilar	Different	0	Correct
G1	187	284	bipe	barp	Mismatching	0.9	Similar	Different	0	Correct
G1	188	224	durk	dook	Mismatching	0	Dissimilar	Different	0	Correct
G1	189	111	fof	fof	Matching	0.01	Dissimilar	Different	0	Incorrect
G1	190	127	bope	barp	Mismatching	0	Dissimilar	Different	0	Correct
G1	191	177	dake	deek	Mismatching	0.93	Similar	Different	0	Correct
G1	192	11	bipe	bope	Mismatching	0.85	Similar	Different	0	Correct
G1	193	324	bipe	barp	Mismatching	S.Eng	S.Eng	Different	0	Correct
G1	194	386	faf	faf	Matching	S.Eng	S.Eng	Same	1	Correct
G1	195	226	faf	faf	Matching	1	Similar	Same	1	Correct
G1	196	302	durk	dake	Mismatching	0.99	Similar	Different	0	Correct
G1	197	220	dook	deek	Mismatching	0.44	Dissimilar	Different	0	Correct
G1	198	375	bowp	bowp	Matching	S.Eng	S.Eng	Same	1	Correct
G1	199	153	fuf	fif	Mismatching	0.11	Dissimilar	Different	0	Correct
G1	200	238	fuff	fof	Mismatching	0.01	Dissimilar	Different	0	Correct
G1	201	103	durk	deek	Mismatching	0.99	Similar	Different	0	Correct
G1	202	94	bowp	bope	Mismatching	0.9	Similar	Different	0	Correct
G1	203	122	bawp	barp	Mismatching	0.45	Dissimilar	Different	0	Correct
G1	204	128	bope	bawp	Mismatching	0	Dissimilar	Different	0	Correct
G1	205	174	bope	bowp	Mismatching	0.94	Similar	Different	0	Correct
G1	206	367	bope	barp	Mismatching	S.Eng	S.Eng	Different	0	Correct
G1	207	233	fuf	fif	Mismatching	0.97	Similar	Different	0	Correct
G1	208	28	faf	fof	Mismatching	0.83	Similar	Different	0	Correct
G1	209	360	fuff	fuff	Matching	S.Eng	S.Eng	Same	1	Correct
G1	210	157	fuff	fif	Mismatching	0	Dissimilar	Different	0	Correct
G1	211	274	fif	fuff	Mismatching	0	Dissimilar	Different	0	Correct
G1	212	202	bawp	barp	Mismatching	0.9	Similar	Different	0	Correct
G1	213	260	deek	deek	Matching	0.93	Similar	Same	1	Correct
G1	215	83	bawp	bawp	Matching	0.45	Dissimilar	Different	0	Incorrect
G1	216	265	durk	durk	Matching	0.2	Dissimilar	Same	1	Correct
G1	217	365	bipe	bawp	Mismatching	S.Eng	S.Eng	Different	0	Correct
G1	218	337	deek	dake	Mismatching	S.Eng	S.Eng	Different	0	Correct
G1	219	161	barp	barp	Matching	0.15	Dissimilar	Same	1	Correct
G1	220	345	durk	durk	Matching	S.Eng	S.Eng	Same	1	Correct
G1	221	56	dake	dake	Matching	1	Similar	Same	1	Correct
G1	222	131	bowp	barp	Mismatching	0.9	Similar	Different	0	Correct
G1	223	41	barp	barp	Matching	0.15	Dissimilar	Same	1	Correct
G1	224	148	fif	fif	Matching	0.97	Similar	Same	1	Correct
G1	225	98	deek	deek	Matching	0.44	Dissimilar	Same	1	Correct
G1	226	118	fuff	fof	Mismatching	0	Dissimilar	Same	1	Incorrect
G1	227	109	fof	faf	Mismatching	0.01	Dissimilar	Same	1	Incorrect
G1	228	378	deek	deek	Matching	S.Eng	S.Eng	Same	1	Correct
G1	229	244	barp	bope	Mismatching	0.02	Dissimilar	Different	0	Correct
G1	230	304	durk	dook	Mismatching	0	Dissimilar	Different	0	Correct
G1	231	196	fof	fuf	Mismatching	0.59	Similar	Same	1	Incorrect
G1	232	152	fuf	faf	Mismatching	0.11	Dissimilar	Different	0	Correct
G1	233	15	bowp	bowp	Matching	0.94	Similar	Same	1	Correct
G1	234	79	fuf	fuff	Mismatching	0.59	Similar	Different	0	Correct
G1	235	57	dake	deek	Mismatching	1	Similar	Different	0	Correct
G1	236	396	fuff	faf	Mismatching	S.Eng	S.Eng	Different	0	Correct
G1	237	187	faf	fif	Mismatching	0.89	Similar	Different	0	Correct
G1	238	321	barp	barp	Matching	S.Eng	S.Eng	Same	1	Correct
G1	239	383	durk	deek	Mismatching	S.Eng	S.Eng	Different	0	Correct
G1	240	316	fuff	faf	Mismatching	1	Similar	Different	0	Correct
G1	241	382	durk	dake	Mismatching	S.Eng	S.Eng	Different	0	Correct
G1	242	306	faf	faf	Matching	1	Similar	Same	1	Correct
G1	243	355	fuf	fuf	Matching	S.Eng	S.Eng	Same	1	Correct
G1	244	146	faf	faf	Matching	1	Similar	Different	0	Incorrect
G1	245	338	deek	deek	Matching	S.Eng	S.Eng	Same	1	Correct
G1	246	192	fif	fof	Mismatching	0	Dissimilar	Different	0	Correct
G1	247	390	fof	fif	Mismatching	S.Eng	S.Eng	Different	0	Correct
G1	248	92	bowp	bawp	Mismatching	0.9	Similar	Different	0	Correct
G1	249	385	durk	durk	Matching	S.Eng	S.Eng	Same	1	Correct
G1	250	82	bawp	barp	Mismatching	0.45	Dissimilar	Different	0	Correct
G1	251	242	barp	bawp	Mismatching	0.01	Dissimilar	Different	0	Correct
G1	252	352	fuf	faf	Mismatching	S.Eng	S.Eng	Different	0	Correct
G1	253	400	fuff	fuff	Matching	S.Eng	S.Eng	Same	1	Correct
G1	254	376	dake	dake	Matching	S.Eng	S.Eng	Same	1	Correct
G1	255	344	durk	dook	Mismatching	S.Eng	S.Eng	Different	0	Correct
G1	256	38	fuf	fuf	Matching	0.59	Similar	Same	1	Correct
G1	257	150	fof	fif	Mismatching	0.01	Dissimilar	Different	0	Correct
G1	258	87	bope	barp	Mismatching	0	Dissimilar	Different	0	Correct
G1	259	231	fof	fof	Matching	0.01	Dissimilar	Different	0	Incorrect
G1	260	381	dook	dook	Matching	S.Eng	S.Eng	Same	1	Correct
G1	261	318	fuff	fof	Mismatching	0.01	Dissimilar	Different	0	Correct
G1	262	384	durk	dook	Mismatching	S.Eng	S.Eng	Different	0	Correct
G1	263	312	fuf	faf	Mismatching	1	Similar	Same	1	Incorrect
G1	264	164	barp	bope	Mismatching	0.02	Dissimilar	Different	0	Correct
G1	265	393	fuf	fif	Mismatching	S.Eng	S.Eng	Different	0	Correct
G1	266	276	fof	fuf	Mismatching	0.59	Similar	Same	1	Incorrect
G1	267	16	dake	dake	Matching	1	Similar	Same	1	Correct
G1	268	299	dook	dake	Mismatching	0.99	Similar	Different	0	Correct
G1	269	295	bowp	bowp	Matching	0.9	Similar	Same	1	Correct
G1	270	223	durk	deek	Mismatching	0.44	Dissimilar	Different	0	Correct
G1	271	227	fif	faf	Mismatching	1	Similar	Different	0	Correct
G1	272	176	dake	dake	Matching	1	Similar	Same	1	Correct
G1	273	156	fuff	faf	Mismatching	0	Dissimilar	Different	0	Correct
G1	274	193	fif	fuf	Mismatching	0.59	Similar	Different	0	Correct
G1	275	309	fof	faf	Mismatching	1	Similar	Different	0	Correct
G1	276	235	fuf	fuf	Matching	0.11	Dissimilar	Different	0	Incorrect
G1	277	327	bope	barp	Mismatching	S.Eng	S.Eng	Different	0	Correct
G1	278	86	bipe	bipe	Matching	1	Similar	Different	0	Incorrect
G1	279	179	dake	durk	Mismatching	0.2	Dissimilar	Different	0	Correct
G1	280	237	fuff	fif	Mismatching	0.97	Similar	Same	1	Incorrect
G1	281	216	dake	dake	Matching	0.99	Similar	Same	1	Correct
G1	282	222	durk	dake	Mismatching	0.99	Similar	Different	0	Correct
G1	283	368	bope	bawp	Mismatching	S.Eng	S.Eng	Different	0	Correct
G1	284	12	bipe	bowp	Mismatching	0.85	Similar	Different	0	Correct
G1	285	264	dook	durk	Mismatching	0.2	Dissimilar	Different	0	Correct
G1	286	138	deek	deek	Matching	0.44	Dissimilar	Same	1	Correct
G1	287	105	durk	durk	Matching	0.99	Similar	Same	1	Correct
G1	288	139	dook	dake	Mismatching	0	Dissimilar	Different	0	Correct
G1	289	8	bawp	bope	Mismatching	0.01	Dissimilar	Different	0	Correct
G1	290	380	dook	deek	Mismatching	S.Eng	S.Eng	Different	0	Correct
G1	291	10	bipe	bipe	Matching	0.85	Similar	Same	1	Correct
G1	292	399	fuff	fuf	Mismatching	S.Eng	S.Eng	Different	0	Correct
G1	293	395	fuf	fuf	Matching	S.Eng	S.Eng	Same	1	Correct
G1	294	133	bowp	bipe	Mismatching	0.9	Similar	Different	0	Correct
G1	295	358	fuff	fof	Mismatching	S.Eng	S.Eng	Different	0	Correct
G1	296	155	fuf	fuf	Matching	0.11	Dissimilar	Different	0	Incorrect
G1	297	123	bawp	bawp	Matching	0.45	Dissimilar	Different	0	Incorrect
G1	298	250	bipe	bipe	Matching	0.85	Similar	Same	1	Correct
G1	299	328	bope	bawp	Mismatching	S.Eng	S.Eng	Different	0	Correct
G1	300	142	durk	dake	Mismatching	0.99	Similar	Different	0	Correct
G1	301	370	bope	bope	Matching	S.Eng	S.Eng	Different	0	Incorrect
G1	302	108	fif	fif	Matching	0.97	Similar	Same	1	Correct
G1	303	162	barp	bawp	Mismatching	0.01	Dissimilar	Different	0	Correct
G1	304	191	fif	fif	Matching	0.89	Similar	Same	1	Correct
G1	305	31	fif	fif	Matching	0.89	Similar	Same	1	Correct
G1	306	112	fuf	faf	Mismatching	0.11	Dissimilar	Different	0	Correct
G1	307	39	fuf	fuff	Mismatching	0.59	Similar	Different	0	Correct
G1	308	258	dake	dook	Mismatching	0.03	Dissimilar	Different	0	Correct
G1	309	100	dook	deek	Mismatching	0	Dissimilar	Different	0	Correct
G1	310	26	faf	faf	Matching	0.83	Similar	Same	1	Correct
G1	311	254	bope	bowp	Mismatching	0.94	Similar	Different	0	Correct
G1	312	190	faf	fuff	Mismatching	0	Dissimilar	Different	0	Correct
G1	313	273	fif	fuf	Mismatching	0.59	Similar	Different	0	Correct
G1	314	5	barp	bowp	Mismatching	0.15	Dissimilar	Different	0	Correct
G1	315	115	fuf	fuf	Matching	0.11	Dissimilar	Different	0	Incorrect
G1	316	143	durk	deek	Mismatching	0.99	Similar	Different	0	Correct
G1	317	280	fuff	fuff	Matching	0	Dissimilar	Different	0	Incorrect
G1	318	379	dook	dake	Mismatching	S.Eng	S.Eng	Different	0	Correct
G1	319	2	barp	bawp	Mismatching	0.15	Dissimilar	Different	0	Correct
G1	320	248	bawp	bope	Mismatching	0.02	Dissimilar	Different	0	Correct
G1	321	120	fuff	fuff	Matching	0	Dissimilar	Different	0	Incorrect
G1	322	217	deek	dake	Mismatching	0.99	Similar	Different	0	Correct
G1	323	170	bipe	bipe	Matching	0.85	Similar	Same	1	Correct
G1	324	160	fuff	fuff	Matching	0	Dissimilar	Different	0	Incorrect
G1	325	114	fuf	fof	Mismatching	0.11	Dissimilar	Same	1	Incorrect
G1	326	240	fuff	fuff	Matching	0	Dissimilar	Different	0	Incorrect
G1	327	197	fof	fuff	Mismatching	0	Dissimilar	Same	1	Incorrect
G1	328	199	fuf	fuff	Mismatching	0	Dissimilar	Same	1	Incorrect
G1	329	326	bipe	bipe	Matching	S.Eng	S.Eng	Same	1	Correct
G1	330	310	fof	fif	Mismatching	0.97	Similar	Different	0	Correct
G1	331	159	fuff	fuf	Mismatching	0	Dissimilar	Different	0	Correct
G1	332	392	fuf	faf	Mismatching	S.Eng	S.Eng	Same	1	Incorrect
G1	333	65	durk	durk	Matching	0.2	Dissimilar	Same	1	Correct
G1	334	397	fuff	fif	Mismatching	S.Eng	S.Eng	Same	1	Incorrect
G1	335	361	barp	barp	Matching	S.Eng	S.Eng	Same	1	Correct
G1	336	298	deek	deek	Matching	0.44	Dissimilar	Same	1	Correct
G1	337	72	fif	fof	Mismatching	0.89	Similar	Different	0	Correct
G1	338	78	fuf	fuf	Matching	0.59	Similar	Different	0	Incorrect
G1	339	102	durk	dake	Mismatching	0.99	Similar	Different	0	Correct
G1	340	119	fuff	fuf	Mismatching	0	Dissimilar	Same	1	Incorrect
G1	341	333	bowp	bipe	Mismatching	S.Eng	S.Eng	Different	0	Correct
G1	342	388	fif	fif	Matching	S.Eng	S.Eng	Same	1	Correct
G1	343	189	faf	fuf	Mismatching	0.59	Similar	Different	0	Correct
G1	344	259	dake	durk	Mismatching	0.2	Dissimilar	Different	0	Correct
G1	345	256	dake	dake	Matching	1	Similar	Same	1	Correct
G1	346	387	fif	faf	Mismatching	S.Eng	S.Eng	Different	0	Correct
G1	347	241	barp	barp	Matching	0.15	Dissimilar	Same	1	Correct
G1	348	126	bipe	bipe	Matching	1	Similar	Same	1	Correct
G1	349	389	fof	faf	Mismatching	S.Eng	S.Eng	Different	0	Correct
G1	350	113	fuf	fif	Mismatching	0.11	Dissimilar	Different	0	Correct
G1	351	30	faf	fuff	Mismatching	0.83	Similar	Different	0	Correct
G1	352	147	fif	faf	Mismatching	0.97	Similar	Different	0	Correct
G1	353	62	deek	durk	Mismatching	0.93	Similar	Different	0	Correct
G1	354	50	bipe	bipe	Matching	0.85	Similar	Different	0	Incorrect
G1	355	339	dook	dake	Mismatching	S.Eng	S.Eng	Different	0	Correct
G1	356	209	bope	bipe	Mismatching	1	Similar	Different	0	Correct
G1	357	64	dook	durk	Mismatching	0.03	Dissimilar	Different	0	Correct
G1	358	61	deek	dook	Mismatching	0.93	Similar	Different	0	Correct
G1	359	53	bope	bope	Matching	0.02	Dissimilar	Same	1	Correct
G1	360	129	bope	bipe	Mismatching	0	Dissimilar	Different	0	Correct
G1	361	373	bowp	bipe	Mismatching	S.Eng	S.Eng	Different	0	Correct
G1	362	346	faf	faf	Matching	S.Eng	S.Eng	Same	1	Correct
G1	363	169	bawp	bowp	Mismatching	0.94	Similar	Different	0	Correct
G1	364	68	faf	fof	Mismatching	0.83	Similar	Different	0	Correct
G1	365	261	deek	dook	Mismatching	0.03	Dissimilar	Different	0	Correct
G1	366	320	fuff	fuff	Matching	0	Dissimilar	Different	0	Incorrect
G1	367	17	dake	deek	Mismatching	1	Similar	Different	0	Correct
G1	368	67	faf	fif	Mismatching	0.83	Similar	Different	0	Correct
G1	369	48	bawp	bope	Mismatching	0.01	Dissimilar	Different	0	Correct
G1	370	330	bope	bope	Matching	S.Eng	S.Eng	Same	1	Correct
G1	371	163	barp	bipe	Mismatching	0.85	Similar	Different	0	Correct
G1	372	348	fif	fif	Matching	S.Eng	S.Eng	Same	1	Correct
G1	373	27	faf	fif	Mismatching	0.83	Similar	Different	0	Correct
G1	374	323	bawp	bawp	Matching	S.Eng	S.Eng	Same	1	Correct
G1	375	257	dake	deek	Mismatching	0.93	Similar	Different	0	Correct
G1	376	1	barp	barp	Matching	0.15	Dissimilar	Same	1	Correct
G1	377	140	dook	deek	Mismatching	0	Dissimilar	Different	0	Correct
G1	378	203	bawp	bawp	Matching	0.45	Dissimilar	Same	1	Correct
G1	379	236	fuff	faf	Mismatching	1	Similar	Different	0	Correct
G1	380	311	fof	fof	Matching	0.01	Dissimilar	Different	0	Incorrect
G1	381	63	dook	dook	Matching	0.03	Dissimilar	Same	1	Correct
G1	382	215	bowp	bowp	Matching	0.9	Similar	Same	1	Correct
G1	383	354	fuf	fof	Mismatching	S.Eng	S.Eng	Different	0	Correct
G1	384	281	barp	barp	Matching	0.9	Similar	Same	1	Correct
G1	385	101	dook	dook	Matching	0	Dissimilar	Same	1	Correct
G1	386	29	faf	fuf	Mismatching	0.83	Similar	Same	1	Incorrect
G1	387	341	dook	dook	Matching	S.Eng	S.Eng	Same	1	Correct
G1	388	4	barp	bope	Mismatching	0.15	Dissimilar	Different	0	Correct
G1	389	59	dake	durk	Mismatching	1	Similar	Different	0	Correct
G1	390	394	fuf	fof	Mismatching	S.Eng	S.Eng	Different	0	Correct
G1	391	69	faf	fuf	Mismatching	0.83	Similar	Same	1	Incorrect
G1	392	49	bawp	bowp	Mismatching	0.01	Dissimilar	Different	0	Correct
G1	393	372	bowp	bawp	Mismatching	S.Eng	S.Eng	Different	0	Correct
G1	394	24	dook	durk	Mismatching	0.03	Dissimilar	Different	0	Correct
G1	395	366	bipe	bipe	Matching	S.Eng	S.Eng	Same	1	Correct
G1	396	22	deek	durk	Mismatching	0.93	Similar	Different	0	Correct
G1	397	255	bowp	bowp	Matching	0.94	Similar	Same	1	Correct
G1	398	275	fof	fof	Matching	0	Dissimilar	Same	1	Correct
G1	399	353	fuf	fif	Mismatching	S.Eng	S.Eng	Different	0	Correct
G1	400	32	fif	fof	Mismatching	0.89	Similar	Different	0	Correct
G10	1	150	fof	fif	Mismatching	0.01	Dissimilar	Different	0	Correct
G10	2	394	fuf	fof	Mismatching	S.Eng	S.Eng	Different	0	Correct
G10	3	196	fof	fuf	Mismatching	0.59	Similar	Same	1	Incorrect
G10	4	205	bipe	bawp	Mismatching	0.45	Dissimilar	Different	0	Correct
G10	5	308	fif	fif	Matching	0.97	Similar	Same	1	Correct
G10	6	193	fif	fuf	Mismatching	0.59	Similar	Different	0	Correct
G10	7	85	bipe	bawp	Mismatching	1	Similar	Different	0	Correct
G10	8	377	deek	dake	Mismatching	S.Eng	S.Eng	Different	0	Correct
G10	9	17	dake	deek	Mismatching	1	Similar	Different	0	Correct
G10	10	249	bawp	bowp	Mismatching	0.94	Similar	Different	0	Correct
G10	11	287	bope	barp	Mismatching	0.9	Similar	Different	0	Correct
G10	12	275	fof	fof	Matching	0	Dissimilar	Same	1	Correct
G10	13	81	barp	barp	Matching	0.9	Similar	Same	1	Correct
G10	14	199	fuf	fuff	Mismatching	0	Dissimilar	Different	0	Correct
G10	15	172	bipe	bowp	Mismatching	0.94	Similar	Different	0	Correct
G10	16	362	bawp	barp	Mismatching	S.Eng	S.Eng	Same	1	Incorrect
G10	17	148	fif	fif	Matching	0.97	Similar	Different	0	Incorrect
G10	18	54	bope	bowp	Mismatching	0.02	Dissimilar	Different	0	Correct
G10	19	234	fuf	fof	Mismatching	0.01	Dissimilar	Same	1	Incorrect
G10	20	182	deek	durk	Mismatching	0.2	Dissimilar	Different	0	Correct
G10	21	66	faf	faf	Matching	0.83	Similar	Different	0	Incorrect
G10	22	11	bipe	bope	Mismatching	0.85	Similar	Different	0	Correct
G10	23	175	bowp	bowp	Matching	0.94	Similar	Same	1	Correct
G10	24	149	fof	faf	Mismatching	0.01	Dissimilar	Different	0	Correct
G10	25	146	faf	faf	Matching	1	Similar	Same	1	Correct
G10	26	278	fuf	fuf	Matching	0.59	Similar	Different	0	Incorrect
G10	27	277	fof	fuff	Mismatching	0	Dissimilar	Same	1	Incorrect
G10	28	20	deek	deek	Matching	0.93	Similar	Same	1	Correct
G10	29	157	fuff	fif	Mismatching	0	Dissimilar	Different	0	Correct
G10	30	147	fif	faf	Mismatching	0.97	Similar	Different	0	Correct
G10	31	78	fuf	fuf	Matching	0.59	Similar	Different	0	Incorrect
G10	32	367	bope	barp	Mismatching	S.Eng	S.Eng	Different	0	Correct
G10	33	138	deek	deek	Matching	0.44	Dissimilar	Same	1	Correct
G10	34	74	fif	fuff	Mismatching	0.89	Similar	Same	1	Incorrect
G10	35	338	deek	deek	Matching	S.Eng	S.Eng	Same	1	Correct
G10	36	247	bawp	bipe	Mismatching	0.85	Similar	Different	0	Correct
G10	37	395	fuf	fuf	Matching	S.Eng	S.Eng	Same	1	Correct
G10	38	229	fof	faf	Mismatching	1	Similar	Different	0	Correct
G10	39	365	bipe	bawp	Mismatching	S.Eng	S.Eng	Different	0	Correct
G10	40	47	bawp	bipe	Mismatching	0.01	Dissimilar	Different	0	Correct
G10	41	4	barp	bope	Mismatching	0.15	Dissimilar	Different	0	Correct
G10	42	96	dake	dake	Matching	0.99	Similar	Same	1	Correct
G10	43	201	barp	barp	Matching	0.9	Similar	Same	1	Correct
G10	44	69	faf	fuf	Mismatching	0.83	Similar	Same	1	Incorrect
G10	45	281	barp	barp	Matching	0.9	Similar	Same	1	Correct
G10	46	306	faf	faf	Matching	1	Similar	Same	1	Correct
G10	47	336	dake	dake	Matching	S.Eng	S.Eng	Same	1	Correct
G10	48	108	fif	fif	Matching	0.97	Similar	Same	1	Correct
G10	49	128	bope	bawp	Mismatching	0	Dissimilar	Different	0	Correct
G10	50	87	bope	barp	Mismatching	0	Dissimilar	Different	0	Correct
G10	51	290	bope	bope	Matching	0	Dissimilar	Different	0	Incorrect
G10	52	231	fof	fof	Matching	0.01	Dissimilar	Different	0	Incorrect
G10	53	227	fif	faf	Mismatching	1	Similar	Different	0	Correct
G10	54	236	fuff	faf	Mismatching	1	Similar	Different	0	Correct
G10	55	211	bowp	barp	Mismatching	0.9	Similar	Different	0	Correct
G10	56	245	barp	bowp	Mismatching	0.94	Similar	Different	0	Correct
G10	57	61	deek	dook	Mismatching	0.93	Similar	Different	0	Correct
G10	58	359	fuff	fuf	Mismatching	S.Eng	S.Eng	Different	0	Correct
G10	59	373	bowp	bipe	Mismatching	S.Eng	S.Eng	Different	0	Correct
G10	60	174	bope	bowp	Mismatching	0.94	Similar	Different	0	Correct
G10	61	109	fof	faf	Mismatching	0.01	Dissimilar	Same	1	Incorrect
G10	62	265	durk	durk	Matching	0.2	Dissimilar	Same	1	Correct
G10	63	38	fuf	fuf	Matching	0.59	Similar	Different	0	Incorrect
G10	64	143	durk	deek	Mismatching	0.99	Similar	Different	0	Correct
G10	65	363	bawp	bawp	Matching	S.Eng	S.Eng	Same	1	Correct
G10	66	298	deek	deek	Matching	0.44	Dissimilar	Same	1	Correct
G10	67	3	barp	bipe	Mismatching	0.15	Dissimilar	Different	0	Correct
G10	68	372	bowp	bawp	Mismatching	S.Eng	S.Eng	Different	0	Correct
G10	69	354	fuf	fof	Mismatching	S.Eng	S.Eng	Same	1	Incorrect
G10	70	167	bawp	bipe	Mismatching	0.85	Similar	Different	0	Correct
G10	71	52	bipe	bowp	Mismatching	0.85	Similar	Different	0	Correct
G10	72	261	deek	dook	Mismatching	0.03	Dissimilar	Different	0	Correct
G10	73	23	dook	dook	Matching	0.03	Dissimilar	Same	1	Correct
G10	74	99	dook	dake	Mismatching	0	Dissimilar	Different	0	Correct
G10	75	239	fuff	fuf	Mismatching	0.11	Dissimilar	Same	1	Incorrect
G10	76	220	dook	deek	Mismatching	0.44	Dissimilar	Different	0	Correct
G10	77	142	durk	dake	Mismatching	0.99	Similar	Different	0	Correct
G10	78	228	fif	fif	Matching	0.97	Similar	Same	1	Correct
G10	79	222	durk	dake	Mismatching	0.99	Similar	Different	0	Correct
G10	80	387	fif	faf	Mismatching	S.Eng	S.Eng	Different	0	Correct
G10	81	95	bowp	bowp	Matching	0.9	Similar	Same	1	Correct
G10	82	232	fuf	faf	Mismatching	1	Similar	Same	1	Incorrect
G10	83	318	fuff	fof	Mismatching	0.01	Dissimilar	Different	0	Correct
G10	84	380	dook	deek	Mismatching	S.Eng	S.Eng	Different	0	Correct
G10	85	384	durk	dook	Mismatching	S.Eng	S.Eng	Different	0	Correct
G10	86	343	durk	deek	Mismatching	S.Eng	S.Eng	Different	0	Correct
G10	87	10	bipe	bipe	Matching	0.85	Similar	Same	1	Correct
G10	88	347	fif	faf	Mismatching	S.Eng	S.Eng	Different	0	Correct
G10	89	264	dook	durk	Mismatching	0.2	Dissimilar	Different	0	Correct
G10	90	122	bawp	barp	Mismatching	0.45	Dissimilar	Different	0	Correct
G10	91	135	bowp	bowp	Matching	0.9	Similar	Same	1	Correct
G10	92	194	fif	fuff	Mismatching	0	Dissimilar	Different	0	Correct
G10	93	355	fuf	fuf	Matching	S.Eng	S.Eng	Same	1	Correct
G10	94	282	bawp	barp	Mismatching	0.9	Similar	Different	0	Correct
G10	95	368	bope	bawp	Mismatching	S.Eng	S.Eng	Different	0	Correct
G10	96	113	fuf	fif	Mismatching	0.11	Dissimilar	Different	0	Correct
G10	97	183	dook	dook	Matching	0.03	Dissimilar	Same	1	Correct
G10	98	238	fuff	fof	Mismatching	0.01	Dissimilar	Different	0	Correct
G10	99	370	bope	bope	Matching	S.Eng	S.Eng	Same	1	Correct
G10	100	226	faf	faf	Matching	1	Similar	Same	1	Correct
G10	101	45	barp	bowp	Mismatching	0.15	Dissimilar	Different	0	Correct
G10	102	46	bawp	bawp	Matching	0.01	Dissimilar	Different	0	Incorrect
G10	103	32	fif	fof	Mismatching	0.89	Similar	Different	0	Correct
G10	104	114	fuf	fof	Mismatching	0.11	Dissimilar	Same	1	Incorrect
G10	105	346	faf	faf	Matching	S.Eng	S.Eng	Same	1	Correct
G10	106	80	fuff	fuff	Matching	0	Dissimilar	Different	0	Incorrect
G10	107	6	bawp	bawp	Matching	0.01	Dissimilar	Different	0	Incorrect
G10	108	295	bowp	bowp	Matching	0.9	Similar	Same	1	Correct
G10	109	92	bowp	bawp	Mismatching	0.9	Similar	Different	0	Correct
G10	110	192	fif	fof	Mismatching	0	Dissimilar	Different	0	Correct
G10	111	64	dook	durk	Mismatching	0.03	Dissimilar	Different	0	Correct
G10	112	154	fuf	fof	Mismatching	0.11	Dissimilar	Different	0	Correct
G10	113	145	durk	durk	Matching	0.99	Similar	Same	1	Correct
G10	114	65	durk	durk	Matching	0.2	Dissimilar	Same	1	Correct
G10	115	129	bope	bipe	Mismatching	0	Dissimilar	Different	0	Correct
G10	116	169	bawp	bowp	Mismatching	0.94	Similar	Different	0	Correct
G10	117	177	dake	deek	Mismatching	0.93	Similar	Different	0	Correct
G10	118	269	faf	fuf	Mismatching	0.59	Similar	Different	0	Correct
G10	119	171	bipe	bope	Mismatching	0.02	Dissimilar	Different	0	Correct
G10	120	173	bope	bope	Matching	0.02	Dissimilar	Same	1	Correct
G10	121	396	fuff	faf	Mismatching	S.Eng	S.Eng	Different	0	Correct
G10	122	195	fof	fof	Matching	0	Dissimilar	Different	0	Incorrect
G10	123	36	fof	fuf	Mismatching	0	Dissimilar	Different	0	Correct
G10	124	243	barp	bipe	Mismatching	0.85	Similar	Different	0	Correct
G10	125	184	dook	durk	Mismatching	0.2	Dissimilar	Different	0	Correct
G10	126	75	fof	fof	Matching	0	Dissimilar	Different	0	Incorrect
G10	127	37	fof	fuff	Mismatching	0	Dissimilar	Different	0	Correct
G10	128	235	fuf	fuf	Matching	0.11	Dissimilar	Same	1	Correct
G10	129	134	bowp	bope	Mismatching	0.9	Similar	Different	0	Correct
G10	130	98	deek	deek	Matching	0.44	Dissimilar	Same	1	Correct
G10	131	285	bipe	bawp	Mismatching	0.45	Dissimilar	Different	0	Correct
G10	132	112	fuf	faf	Mismatching	0.11	Dissimilar	Different	0	Correct
G10	133	341	dook	dook	Matching	S.Eng	S.Eng	Different	0	Incorrect
G10	134	333	bowp	bipe	Mismatching	S.Eng	S.Eng	Different	0	Correct
G10	135	15	bowp	bowp	Matching	0.94	Similar	Same	1	Correct
G10	136	223	durk	deek	Mismatching	0.44	Dissimilar	Different	0	Correct
G10	137	280	fuff	fuff	Matching	0	Dissimilar	Different	0	Incorrect
G10	138	132	bowp	bawp	Mismatching	0.9	Similar	Different	0	Correct
G10	139	101	dook	dook	Matching	0	Dissimilar	Different	0	Incorrect
G10	140	105	durk	durk	Matching	0.99	Similar	Same	1	Correct
G10	141	89	bope	bipe	Mismatching	0	Dissimilar	Different	0	Correct
G10	142	203	bawp	bawp	Matching	0.45	Dissimilar	Same	1	Correct
G10	143	48	bawp	bope	Mismatching	0.01	Dissimilar	Different	0	Correct
G10	144	90	bope	bope	Matching	0	Dissimilar	Same	1	Correct
G10	145	72	fif	fof	Mismatching	0.89	Similar	Different	0	Correct
G10	146	82	bawp	barp	Mismatching	0.45	Dissimilar	Different	0	Correct
G10	147	334	bowp	bope	Mismatching	S.Eng	S.Eng	Different	0	Correct
G10	148	63	dook	dook	Matching	0.03	Dissimilar	Same	1	Correct
G10	149	310	fof	fif	Mismatching	0.97	Similar	Different	0	Correct
G10	150	67	faf	fif	Mismatching	0.83	Similar	Different	0	Correct
G10	151	34	fif	fuff	Mismatching	0.89	Similar	Same	1	Incorrect
G10	152	164	barp	bope	Mismatching	0.02	Dissimilar	Different	0	Correct
G10	153	284	bipe	barp	Mismatching	0.9	Similar	Different	0	Correct
G10	154	379	dook	dake	Mismatching	S.Eng	S.Eng	Different	0	Correct
G10	155	76	fof	fuf	Mismatching	0	Dissimilar	Same	1	Incorrect
G10	156	55	bowp	bowp	Matching	0.94	Similar	Same	1	Correct
G10	157	197	fof	fuff	Mismatching	0	Dissimilar	Same	1	Incorrect
G10	158	158	fuff	fof	Mismatching	0	Dissimilar	Same	1	Incorrect
G10	159	224	durk	dook	Mismatching	0	Dissimilar	Different	0	Correct
G10	160	375	bowp	bowp	Matching	S.Eng	S.Eng	Same	1	Correct
G10	161	216	dake	dake	Matching	0.99	Similar	Same	1	Correct
G10	162	133	bowp	bipe	Mismatching	0.9	Similar	Different	0	Correct
G10	163	351	fof	fof	Matching	S.Eng	S.Eng	Different	0	Incorrect
G10	164	292	bowp	bawp	Mismatching	0.45	Dissimilar	Different	0	Correct
G10	165	215	bowp	bowp	Matching	0.9	Similar	Same	1	Correct
G10	166	392	fuf	faf	Mismatching	S.Eng	S.Eng	Same	1	Incorrect
G10	167	311	fof	fof	Matching	0.01	Dissimilar	Different	0	Incorrect
G10	168	94	bowp	bope	Mismatching	0.9	Similar	Different	0	Correct
G10	169	274	fif	fuff	Mismatching	0	Dissimilar	Different	0	Correct
G10	170	386	faf	faf	Matching	S.Eng	S.Eng	Same	1	Correct
G10	171	317	fuff	fif	Mismatching	0.97	Similar	Same	1	Incorrect
G10	172	352	fuf	faf	Mismatching	S.Eng	S.Eng	Different	0	Correct
G10	173	266	faf	faf	Matching	0.83	Similar	Same	1	Correct
G10	174	121	barp	barp	Matching	0.9	Similar	Same	1	Correct
G10	175	316	fuff	faf	Mismatching	1	Similar	Different	0	Correct
G10	176	241	barp	barp	Matching	0.15	Dissimilar	Different	0	Incorrect
G10	177	330	bope	bope	Matching	S.Eng	S.Eng	Same	1	Correct
G10	178	102	durk	dake	Mismatching	0.99	Similar	Different	0	Correct
G10	179	79	fuf	fuff	Mismatching	0.59	Similar	Different	0	Correct
G10	180	267	faf	fif	Mismatching	0.89	Similar	Different	0	Correct
G10	181	393	fuf	fif	Mismatching	S.Eng	S.Eng	Different	0	Correct
G10	182	307	fif	faf	Mismatching	1	Similar	Different	0	Correct
G10	183	131	bowp	barp	Mismatching	0.9	Similar	Same	1	Incorrect
G10	184	180	deek	deek	Matching	0.93	Similar	Same	1	Correct
G10	185	39	fuf	fuff	Mismatching	0.59	Similar	Different	0	Correct
G10	186	144	durk	dook	Mismatching	0.99	Similar	Different	0	Correct
G10	187	188	faf	fof	Mismatching	0	Dissimilar	Different	0	Correct
G10	188	315	fuf	fuf	Matching	0.11	Dissimilar	Different	0	Incorrect
G10	189	56	dake	dake	Matching	1	Similar	Same	1	Correct
G10	190	339	dook	dake	Mismatching	S.Eng	S.Eng	Different	0	Correct
G10	191	31	fif	fif	Matching	0.89	Similar	Different	0	Incorrect
G10	192	126	bipe	bipe	Matching	1	Similar	Same	1	Correct
G10	193	7	bawp	bipe	Mismatching	0.01	Dissimilar	Different	0	Correct
G10	194	300	dook	deek	Mismatching	0.44	Dissimilar	Different	0	Correct
G10	195	366	bipe	bipe	Matching	S.Eng	S.Eng	Same	1	Correct
G10	196	309	fof	faf	Mismatching	1	Similar	Different	0	Correct
G10	197	204	bipe	barp	Mismatching	0.9	Similar	Different	0	Correct
G10	198	321	barp	barp	Matching	S.Eng	S.Eng	Same	1	Correct
G10	199	329	bope	bipe	Mismatching	S.Eng	S.Eng	Different	0	Correct
G10	200	107	fif	faf	Mismatching	0.97	Similar	Different	0	Correct
G10	201	350	fof	fif	Mismatching	S.Eng	S.Eng	Different	0	Correct
G10	202	383	durk	deek	Mismatching	S.Eng	S.Eng	Different	0	Correct
G10	203	189	faf	fuf	Mismatching	0.59	Similar	Different	0	Correct
G10	204	200	fuff	fuff	Matching	0	Dissimilar	Different	0	Incorrect
G10	205	268	faf	fof	Mismatching	0	Dissimilar	Same	1	Incorrect
G10	206	296	dake	dake	Matching	0.99	Similar	Same	1	Correct
G10	207	240	fuff	fuff	Matching	0	Dissimilar	Same	1	Correct
G10	208	51	bipe	bope	Mismatching	0.85	Similar	Different	0	Correct
G10	209	53	bope	bope	Matching	0.02	Dissimilar	Same	1	Correct
G10	210	35	fof	fof	Matching	0	Dissimilar	Different	0	Incorrect
G10	211	244	barp	bope	Mismatching	0.02	Dissimilar	Different	0	Correct
G10	212	356	fuff	faf	Mismatching	S.Eng	S.Eng	Different	0	Correct
G10	213	43	barp	bipe	Mismatching	0.15	Dissimilar	Different	0	Correct
G10	214	119	fuff	fuf	Mismatching	0	Dissimilar	Different	0	Correct
G10	215	348	fif	fif	Matching	S.Eng	S.Eng	Same	1	Correct
G10	216	106	faf	faf	Matching	1	Similar	Same	1	Correct
G10	217	191	fif	fif	Matching	0.89	Similar	Different	0	Incorrect
G10	218	320	fuff	fuff	Matching	0	Dissimilar	Different	0	Incorrect
G10	219	70	faf	fuff	Mismatching	0.83	Similar	Different	0	Correct
G10	220	369	bope	bipe	Mismatching	S.Eng	S.Eng	Different	0	Correct
G10	221	30	faf	fuff	Mismatching	0.83	Similar	Different	0	Correct
G10	222	161	barp	barp	Matching	0.15	Dissimilar	Same	1	Correct
G10	223	388	fif	fif	Matching	S.Eng	S.Eng	Different	0	Incorrect
G10	224	381	dook	dook	Matching	S.Eng	S.Eng	Same	1	Correct
G10	225	73	fif	fuf	Mismatching	0.89	Similar	Different	0	Correct
G10	226	14	bope	bowp	Mismatching	0.02	Dissimilar	Different	0	Correct
G10	227	212	bowp	bawp	Mismatching	0.45	Dissimilar	Different	0	Correct
G10	228	237	fuff	fif	Mismatching	0.97	Similar	Different	0	Correct
G10	229	29	faf	fuf	Mismatching	0.83	Similar	Same	1	Incorrect
G10	230	124	bipe	barp	Mismatching	1	Similar	Different	0	Correct
G10	231	91	bowp	barp	Mismatching	0.9	Similar	Same	1	Incorrect
G10	232	140	dook	deek	Mismatching	0	Dissimilar	Different	0	Correct
G10	233	115	fuf	fuf	Matching	0.11	Dissimilar	Different	0	Incorrect
G10	234	58	dake	dook	Mismatching	1	Similar	Different	0	Correct
G10	235	390	fof	fif	Mismatching	S.Eng	S.Eng	Different	0	Correct
G10	236	120	fuff	fuff	Matching	0	Dissimilar	Different	0	Incorrect
G10	237	332	bowp	bawp	Mismatching	S.Eng	S.Eng	Different	0	Correct
G10	238	397	fuff	fif	Mismatching	S.Eng	S.Eng	Same	1	Incorrect
G10	239	357	fuff	fif	Mismatching	S.Eng	S.Eng	Same	1	Incorrect
G10	240	271	fif	fif	Matching	0.89	Similar	Same	1	Correct
G10	241	213	bowp	bipe	Mismatching	1	Similar	Different	0	Correct
G10	242	160	fuff	fuff	Matching	0	Dissimilar	Different	0	Incorrect
G10	243	263	dook	dook	Matching	0.03	Dissimilar	Different	0	Incorrect
G10	244	323	bawp	bawp	Matching	S.Eng	S.Eng	Different	0	Incorrect
G10	245	217	deek	dake	Mismatching	0.99	Similar	Different	0	Correct
G10	246	26	faf	faf	Matching	0.83	Similar	Different	0	Incorrect
G10	247	358	fuff	fof	Mismatching	S.Eng	S.Eng	Different	0	Correct
G10	248	364	bipe	barp	Mismatching	S.Eng	S.Eng	Different	0	Correct
G10	249	139	dook	dake	Mismatching	0	Dissimilar	Different	0	Correct
G10	250	22	deek	durk	Mismatching	0.93	Similar	Different	0	Correct
G10	251	12	bipe	bowp	Mismatching	0.85	Similar	Different	0	Correct
G10	252	88	bope	bawp	Mismatching	0	Dissimilar	Different	0	Correct
G10	253	153	fuf	fif	Mismatching	0.11	Dissimilar	Different	0	Correct
G10	254	186	faf	faf	Matching	0.83	Similar	Same	1	Correct
G10	255	252	bipe	bowp	Mismatching	0.94	Similar	Different	0	Correct
G10	256	125	bipe	bawp	Mismatching	1	Similar	Different	0	Correct
G10	257	273	fif	fuf	Mismatching	0.59	Similar	Different	0	Correct
G10	258	293	bowp	bipe	Mismatching	1	Similar	Different	0	Correct
G10	259	225	durk	durk	Matching	0.99	Similar	Same	1	Correct
G10	260	342	durk	dake	Mismatching	S.Eng	S.Eng	Different	0	Correct
G10	261	254	bope	bowp	Mismatching	0.94	Similar	Different	0	Correct
G10	262	77	fof	fuff	Mismatching	0	Dissimilar	Different	0	Correct
G10	263	400	fuff	fuff	Matching	S.Eng	S.Eng	Same	1	Correct
G10	264	57	dake	deek	Mismatching	1	Similar	Different	0	Correct
G10	265	206	bipe	bipe	Matching	1	Similar	Different	0	Incorrect
G10	266	214	bowp	bope	Mismatching	0	Dissimilar	Different	0	Correct
G10	267	103	durk	deek	Mismatching	0.99	Similar	Different	0	Correct
G10	268	289	bope	bipe	Mismatching	1	Similar	Different	0	Correct
G10	269	155	fuf	fuf	Matching	0.11	Dissimilar	Different	0	Incorrect
G10	270	198	fuf	fuf	Matching	0.59	Similar	Same	1	Correct
G10	271	314	fuf	fof	Mismatching	0.01	Dissimilar	Same	1	Incorrect
G10	272	218	deek	deek	Matching	0.44	Dissimilar	Same	1	Correct
G10	273	130	bope	bope	Matching	0	Dissimilar	Same	1	Correct
G10	274	116	fuff	faf	Mismatching	0	Dissimilar	Different	0	Correct
G10	275	319	fuff	fuf	Mismatching	0.11	Dissimilar	Different	0	Correct
G10	276	253	bope	bope	Matching	0.02	Dissimilar	Different	0	Incorrect
G10	277	165	barp	bowp	Mismatching	0.94	Similar	Different	0	Correct
G10	278	25	durk	durk	Matching	0.2	Dissimilar	Same	1	Correct
G10	279	272	fif	fof	Mismatching	0	Dissimilar	Different	0	Correct
G10	280	44	barp	bope	Mismatching	0.15	Dissimilar	Different	0	Correct
G10	281	13	bope	bope	Matching	0.02	Dissimilar	Same	1	Correct
G10	282	286	bipe	bipe	Matching	1	Similar	Same	1	Correct
G10	283	391	fof	fof	Matching	S.Eng	S.Eng	Same	1	Correct
G10	284	257	dake	deek	Mismatching	0.93	Similar	Different	0	Correct
G10	285	19	dake	durk	Mismatching	1	Similar	Different	0	Correct
G10	286	345	durk	durk	Matching	S.Eng	S.Eng	Same	1	Correct
G10	287	151	fof	fof	Matching	0.01	Dissimilar	Same	1	Correct
G10	288	118	fuff	fof	Mismatching	0	Dissimilar	Same	1	Incorrect
G10	289	340	dook	deek	Mismatching	S.Eng	S.Eng	Different	0	Correct
G10	290	335	bowp	bowp	Matching	S.Eng	S.Eng	Different	0	Incorrect
G10	291	302	durk	dake	Mismatching	0.99	Similar	Different	0	Correct
G10	292	398	fuff	fof	Mismatching	S.Eng	S.Eng	Different	0	Correct
G10	293	326	bipe	bipe	Matching	S.Eng	S.Eng	Same	1	Correct
G10	294	374	bowp	bope	Mismatching	S.Eng	S.Eng	Different	0	Correct
G10	295	301	dook	dook	Matching	0	Dissimilar	Different	0	Incorrect
G10	296	166	bawp	bawp	Matching	0.01	Dissimilar	Same	1	Correct
G10	297	297	deek	dake	Mismatching	0.99	Similar	Different	0	Correct
G10	298	256	dake	dake	Matching	1	Similar	Same	1	Correct
G10	299	50	bipe	bipe	Matching	0.85	Similar	Same	1	Correct
G10	300	233	fuf	fif	Mismatching	0.97	Similar	Different	0	Correct
G10	301	59	dake	durk	Mismatching	1	Similar	Different	0	Correct
G10	302	208	bope	bawp	Mismatching	0.45	Dissimilar	Different	0	Correct
G10	303	209	bope	bipe	Mismatching	1	Similar	Different	0	Correct
G10	304	276	fof	fuf	Mismatching	0.59	Similar	Same	1	Incorrect
G10	305	24	dook	durk	Mismatching	0.03	Dissimilar	Different	0	Correct
G10	306	152	fuf	faf	Mismatching	0.11	Dissimilar	Different	0	Correct
G10	307	305	durk	durk	Matching	0.99	Similar	Same	1	Correct
G10	308	246	bawp	bawp	Matching	0.01	Dissimilar	Same	1	Correct
G10	309	18	dake	dook	Mismatching	1	Similar	Different	0	Correct
G10	310	324	bipe	barp	Mismatching	S.Eng	S.Eng	Different	0	Correct
G10	311	33	fif	fuf	Mismatching	0.89	Similar	Different	0	Correct
G10	312	84	bipe	barp	Mismatching	1	Similar	Different	0	Correct
G10	313	242	barp	bawp	Mismatching	0.01	Dissimilar	Different	0	Correct
G10	314	262	deek	durk	Mismatching	0.2	Dissimilar	Different	0	Correct
G10	315	304	durk	dook	Mismatching	0	Dissimilar	Different	0	Correct
G10	316	123	bawp	bawp	Matching	0.45	Dissimilar	Same	1	Correct
G10	317	141	dook	dook	Matching	0	Dissimilar	Different	0	Incorrect
G10	318	385	durk	durk	Matching	S.Eng	S.Eng	Same	1	Correct
G10	319	378	deek	deek	Matching	S.Eng	S.Eng	Same	1	Correct
G10	320	331	bowp	barp	Mismatching	S.Eng	S.Eng	Different	0	Correct
G10	321	399	fuff	fuf	Mismatching	S.Eng	S.Eng	Different	0	Correct
G10	322	288	bope	bawp	Mismatching	0.45	Dissimilar	Different	0	Correct
G10	323	327	bope	barp	Mismatching	S.Eng	S.Eng	Different	0	Correct
G10	324	294	bowp	bope	Mismatching	0	Dissimilar	Different	0	Correct
G10	325	179	dake	durk	Mismatching	0.2	Dissimilar	Different	0	Correct
G10	326	83	bawp	bawp	Matching	0.45	Dissimilar	Same	1	Correct
G10	327	42	barp	bawp	Mismatching	0.15	Dissimilar	Different	0	Correct
G10	328	176	dake	dake	Matching	1	Similar	Same	1	Correct
G10	329	260	deek	deek	Matching	0.93	Similar	Same	1	Correct
G10	330	156	fuff	faf	Mismatching	0	Dissimilar	Different	0	Correct
G10	331	371	bowp	barp	Mismatching	S.Eng	S.Eng	Different	0	Correct
G10	332	170	bipe	bipe	Matching	0.85	Similar	Same	1	Correct
G10	333	353	fuf	fif	Mismatching	S.Eng	S.Eng	Different	0	Correct
G10	334	159	fuff	fuf	Mismatching	0	Dissimilar	Different	0	Correct
G10	335	97	deek	dake	Mismatching	0.44	Dissimilar	Different	0	Correct
G10	336	360	fuff	fuff	Matching	S.Eng	S.Eng	Same	1	Correct
G10	337	181	deek	dook	Mismatching	0.03	Dissimilar	Different	0	Correct
G10	338	221	dook	dook	Matching	0	Dissimilar	Same	1	Correct
G10	339	136	dake	dake	Matching	0.99	Similar	Same	1	Correct
G10	340	117	fuff	fif	Mismatching	0	Dissimilar	Different	0	Correct
G10	341	291	bowp	barp	Mismatching	0.9	Similar	Different	0	Correct
G10	342	187	faf	fif	Mismatching	0.89	Similar	Different	0	Correct
G10	343	2	barp	bawp	Mismatching	0.15	Dissimilar	Different	0	Correct
G10	344	299	dook	dake	Mismatching	0.99	Similar	Different	0	Correct
G10	345	312	fuf	faf	Mismatching	1	Similar	Same	1	Incorrect
G10	346	349	fof	faf	Mismatching	S.Eng	S.Eng	Different	0	Correct
G10	347	168	bawp	bope	Mismatching	0.02	Dissimilar	Different	0	Correct
G10	348	270	faf	fuff	Mismatching	0	Dissimilar	Different	0	Correct
G10	349	127	bope	barp	Mismatching	0	Dissimilar	Different	0	Correct
G10	350	219	dook	dake	Mismatching	0.99	Similar	Different	0	Correct
G10	351	389	fof	faf	Mismatching	S.Eng	S.Eng	Different	0	Correct
G10	352	328	bope	bawp	Mismatching	S.Eng	S.Eng	Different	0	Correct
G10	353	251	bipe	bope	Mismatching	0.02	Dissimilar	Different	0	Correct
G10	354	361	barp	barp	Matching	S.Eng	S.Eng	Same	1	Correct
G10	355	68	faf	fof	Mismatching	0.83	Similar	Different	0	Correct
G10	356	178	dake	dook	Mismatching	0.03	Dissimilar	Different	0	Correct
G10	357	60	deek	deek	Matching	0.93	Similar	Same	1	Correct
G10	358	283	bawp	bawp	Matching	0.45	Dissimilar	Same	1	Correct
G10	359	21	deek	dook	Mismatching	0.93	Similar	Different	0	Correct
G10	360	344	durk	dook	Mismatching	S.Eng	S.Eng	Different	0	Correct
G10	361	104	durk	dook	Mismatching	0.99	Similar	Different	0	Correct
G10	362	28	faf	fof	Mismatching	0.83	Similar	Different	0	Correct
G10	363	40	fuff	fuff	Matching	0	Dissimilar	Different	0	Incorrect
G10	364	255	bowp	bowp	Matching	0.94	Similar	Same	1	Correct
G10	365	202	bawp	barp	Mismatching	0.9	Similar	Different	0	Correct
G10	366	185	durk	durk	Matching	0.2	Dissimilar	Same	1	Correct
G10	367	8	bawp	bope	Mismatching	0.01	Dissimilar	Different	0	Correct
G10	368	71	fif	fif	Matching	0.89	Similar	Different	0	Incorrect
G10	369	325	bipe	bawp	Mismatching	S.Eng	S.Eng	Different	0	Correct
G10	370	337	deek	dake	Mismatching	S.Eng	S.Eng	Different	0	Correct
G10	371	5	barp	bowp	Mismatching	0.15	Dissimilar	Different	0	Correct
G10	372	210	bope	bope	Matching	0	Dissimilar	Different	0	Incorrect
G10	373	230	fof	fif	Mismatching	0.97	Similar	Different	0	Correct
G10	374	27	faf	fif	Mismatching	0.83	Similar	Different	0	Correct
G10	375	162	barp	bawp	Mismatching	0.01	Dissimilar	Same	1	Incorrect
G10	376	313	fuf	fif	Mismatching	0.97	Similar	Different	0	Correct
G10	377	1	barp	barp	Matching	0.15	Dissimilar	Same	1	Correct
G10	378	382	durk	dake	Mismatching	S.Eng	S.Eng	Different	0	Correct
G10	379	250	bipe	bipe	Matching	0.85	Similar	Different	0	Incorrect
G10	380	16	dake	dake	Matching	1	Similar	Same	1	Correct
G10	381	137	deek	dake	Mismatching	0.44	Dissimilar	Different	0	Correct
G10	382	110	fof	fif	Mismatching	0.01	Dissimilar	Different	0	Correct
G10	383	86	bipe	bipe	Matching	1	Similar	Same	1	Correct
G10	384	163	barp	bipe	Mismatching	0.85	Similar	Different	0	Correct
G10	385	93	bowp	bipe	Mismatching	0.9	Similar	Different	0	Correct
G10	386	49	bawp	bowp	Mismatching	0.01	Dissimilar	Different	0	Correct
G10	387	279	fuf	fuff	Mismatching	0	Dissimilar	Different	0	Correct
G10	388	100	dook	deek	Mismatching	0	Dissimilar	Different	0	Correct
G10	389	322	bawp	barp	Mismatching	S.Eng	S.Eng	Different	0	Correct
G10	390	190	faf	fuff	Mismatching	0	Dissimilar	Different	0	Correct
G10	391	207	bope	barp	Mismatching	0.9	Similar	Different	0	Correct
G10	392	41	barp	barp	Matching	0.15	Dissimilar	Different	0	Incorrect
G10	393	303	durk	deek	Mismatching	0.44	Dissimilar	Different	0	Correct
G10	394	258	dake	dook	Mismatching	0.03	Dissimilar	Different	0	Correct
G10	395	62	deek	durk	Mismatching	0.93	Similar	Different	0	Correct
G10	396	376	dake	dake	Matching	S.Eng	S.Eng	Same	1	Correct
G10	397	248	bawp	bope	Mismatching	0.02	Dissimilar	Different	0	Correct
G10	398	9	bawp	bowp	Mismatching	0.01	Dissimilar	Different	0	Correct
G10	399	111	fof	fof	Matching	0.01	Dissimilar	Different	0	Incorrect
G10	400	259	dake	durk	Mismatching	0.2	Dissimilar	Different	0	Correct
G11	1	113	fuf	fif	Mismatching	0.11	Dissimilar	Different	0	Correct
G11	2	185	durk	durk	Matching	0.2	Dissimilar	Different	0	Incorrect
G11	3	52	bipe	bowp	Mismatching	0.85	Similar	Different	0	Correct
G11	4	264	dook	durk	Mismatching	0.2	Dissimilar	Different	0	Correct
G11	5	386	faf	faf	Matching	S.Eng	S.Eng	Same	1	Correct
G11	6	357	fuff	fif	Mismatching	S.Eng	S.Eng	Different	0	Correct
G11	7	19	dake	durk	Mismatching	1	Similar	Different	0	Correct
G11	8	69	faf	fuf	Mismatching	0.83	Similar	Same	1	Incorrect
G11	9	285	bipe	bawp	Mismatching	0.45	Dissimilar	Different	0	Correct
G11	10	127	bope	barp	Mismatching	0	Dissimilar	Different	0	Correct
G11	11	385	durk	durk	Matching	S.Eng	S.Eng	Same	1	Correct
G11	12	51	bipe	bope	Mismatching	0.85	Similar	Different	0	Correct
G11	13	61	deek	dook	Mismatching	0.93	Similar	Different	0	Correct
G11	14	323	bawp	bawp	Matching	S.Eng	S.Eng	Different	0	Incorrect
G11	15	238	fuff	fof	Mismatching	0.01	Dissimilar	Different	0	Correct
G11	16	141	dook	dook	Matching	0	Dissimilar	Different	0	Incorrect
G11	17	254	bope	bowp	Mismatching	0.94	Similar	Different	0	Correct
G11	18	260	deek	deek	Matching	0.93	Similar	Same	1	Correct
G11	19	86	bipe	bipe	Matching	1	Similar	Same	1	Correct
G11	20	358	fuff	fof	Mismatching	S.Eng	S.Eng	Same	1	Incorrect
G11	21	10	bipe	bipe	Matching	0.85	Similar	Different	0	Incorrect
G11	22	54	bope	bowp	Mismatching	0.02	Dissimilar	Different	0	Correct
G11	23	111	fof	fof	Matching	0.01	Dissimilar	Different	0	Incorrect
G11	24	242	barp	bawp	Mismatching	0.01	Dissimilar	Same	1	Incorrect
G11	25	124	bipe	barp	Mismatching	1	Similar	Different	0	Correct
G11	26	149	fof	faf	Mismatching	0.01	Dissimilar	Same	1	Incorrect
G11	27	318	fuff	fof	Mismatching	0.01	Dissimilar	Different	0	Correct
G11	28	343	durk	deek	Mismatching	S.Eng	S.Eng	Different	0	Correct
G11	29	365	bipe	bawp	Mismatching	S.Eng	S.Eng	Different	0	Correct
G11	30	376	dake	dake	Matching	S.Eng	S.Eng	Same	1	Correct
G11	31	369	bope	bipe	Mismatching	S.Eng	S.Eng	Different	0	Correct
G11	32	112	fuf	faf	Mismatching	0.11	Dissimilar	Same	1	Incorrect
G11	33	263	dook	dook	Matching	0.03	Dissimilar	Different	0	Incorrect
G11	34	43	barp	bipe	Mismatching	0.15	Dissimilar	Different	0	Correct
G11	35	37	fof	fuff	Mismatching	0	Dissimilar	Different	0	Correct
G11	36	41	barp	barp	Matching	0.15	Dissimilar	Same	1	Correct
G11	37	170	bipe	bipe	Matching	0.85	Similar	Same	1	Correct
G11	38	315	fuf	fuf	Matching	0.11	Dissimilar	Different	0	Incorrect
G11	39	183	dook	dook	Matching	0.03	Dissimilar	Same	1	Correct
G11	40	2	barp	bawp	Mismatching	0.15	Dissimilar	Different	0	Correct
G11	41	353	fuf	fif	Mismatching	S.Eng	S.Eng	Different	0	Correct
G11	42	88	bope	bawp	Mismatching	0	Dissimilar	Different	0	Correct
G11	43	143	durk	deek	Mismatching	0.99	Similar	Different	0	Correct
G11	44	275	fof	fof	Matching	0	Dissimilar	Same	1	Correct
G11	45	224	durk	dook	Mismatching	0	Dissimilar	Different	0	Correct
G11	46	160	fuff	fuff	Matching	0	Dissimilar	Different	0	Incorrect
G11	47	138	deek	deek	Matching	0.44	Dissimilar	Same	1	Correct
G11	48	75	fof	fof	Matching	0	Dissimilar	Same	1	Correct
G11	49	265	durk	durk	Matching	0.2	Dissimilar	Different	0	Incorrect
G11	50	62	deek	durk	Mismatching	0.93	Similar	Different	0	Correct
G11	51	35	fof	fof	Matching	0	Dissimilar	Same	1	Correct
G11	52	251	bipe	bope	Mismatching	0.02	Dissimilar	Different	0	Correct
G11	53	327	bope	barp	Mismatching	S.Eng	S.Eng	Different	0	Correct
G11	54	231	fof	fof	Matching	0.01	Dissimilar	Same	1	Correct
G11	55	319	fuff	fuf	Mismatching	0.11	Dissimilar	Different	0	Correct
G11	56	235	fuf	fuf	Matching	0.11	Dissimilar	Same	1	Correct
G11	57	244	barp	bope	Mismatching	0.02	Dissimilar	Different	0	Correct
G11	58	116	fuff	faf	Mismatching	0	Dissimilar	Same	1	Incorrect
G11	59	384	durk	dook	Mismatching	S.Eng	S.Eng	Different	0	Correct
G11	60	176	dake	dake	Matching	1	Similar	Same	1	Correct
G11	61	114	fuf	fof	Mismatching	0.11	Dissimilar	Same	1	Incorrect
G11	62	186	faf	faf	Matching	0.83	Similar	Same	1	Correct
G11	63	48	bawp	bope	Mismatching	0.01	Dissimilar	Different	0	Correct
G11	64	354	fuf	fof	Mismatching	S.Eng	S.Eng	Same	1	Incorrect
G11	65	60	deek	deek	Matching	0.93	Similar	Same	1	Correct
G11	66	23	dook	dook	Matching	0.03	Dissimilar	Same	1	Correct
G11	67	95	bowp	bowp	Matching	0.9	Similar	Same	1	Correct
G11	68	192	fif	fof	Mismatching	0	Dissimilar	Different	0	Correct
G11	69	85	bipe	bawp	Mismatching	1	Similar	Different	0	Correct
G11	70	300	dook	deek	Mismatching	0.44	Dissimilar	Same	1	Incorrect
G11	71	57	dake	deek	Mismatching	1	Similar	Different	0	Correct
G11	72	154	fuf	fof	Mismatching	0.11	Dissimilar	Same	1	Incorrect
G11	73	373	bowp	bipe	Mismatching	S.Eng	S.Eng	Different	0	Correct
G11	74	194	fif	fuff	Mismatching	0	Dissimilar	Different	0	Correct
G11	75	193	fif	fuf	Mismatching	0.59	Similar	Different	0	Correct
G11	76	286	bipe	bipe	Matching	1	Similar	Same	1	Correct
G11	77	261	deek	dook	Mismatching	0.03	Dissimilar	Different	0	Correct
G11	78	320	fuff	fuff	Matching	0	Dissimilar	Different	0	Incorrect
G11	79	272	fif	fof	Mismatching	0	Dissimilar	Different	0	Correct
G11	80	280	fuff	fuff	Matching	0	Dissimilar	Different	0	Incorrect
G11	81	348	fif	fif	Matching	S.Eng	S.Eng	Same	1	Correct
G11	82	8	bawp	bope	Mismatching	0.01	Dissimilar	Different	0	Correct
G11	83	283	bawp	bawp	Matching	0.45	Dissimilar	Different	0	Incorrect
G11	84	72	fif	fof	Mismatching	0.89	Similar	Same	1	Incorrect
G11	85	356	fuff	faf	Mismatching	S.Eng	S.Eng	Different	0	Correct
G11	86	108	fif	fif	Matching	0.97	Similar	Same	1	Correct
G11	87	99	dook	dake	Mismatching	0	Dissimilar	Different	0	Correct
G11	88	284	bipe	barp	Mismatching	0.9	Similar	Different	0	Correct
G11	89	361	barp	barp	Matching	S.Eng	S.Eng	Same	1	Correct
G11	90	93	bowp	bipe	Mismatching	0.9	Similar	Different	0	Correct
G11	91	90	bope	bope	Matching	0	Dissimilar	Different	0	Incorrect
G11	92	352	fuf	faf	Mismatching	S.Eng	S.Eng	Same	1	Incorrect
G11	93	299	dook	dake	Mismatching	0.99	Similar	Different	0	Correct
G11	94	248	bawp	bope	Mismatching	0.02	Dissimilar	Different	0	Correct
G11	95	217	deek	dake	Mismatching	0.99	Similar	Different	0	Correct
G11	96	17	dake	deek	Mismatching	1	Similar	Different	0	Correct
G11	97	106	faf	faf	Matching	1	Similar	Same	1	Correct
G11	98	226	faf	faf	Matching	1	Similar	Same	1	Correct
G11	99	393	fuf	fif	Mismatching	S.Eng	S.Eng	Different	0	Correct
G11	100	42	barp	bawp	Mismatching	0.15	Dissimilar	Different	0	Correct
G11	101	239	fuff	fuf	Mismatching	0.11	Dissimilar	Different	0	Correct
G11	102	360	fuff	fuff	Matching	S.Eng	S.Eng	Same	1	Correct
G11	103	107	fif	faf	Mismatching	0.97	Similar	Different	0	Correct
G11	104	162	barp	bawp	Mismatching	0.01	Dissimilar	Different	0	Correct
G11	105	331	bowp	barp	Mismatching	S.Eng	S.Eng	Same	1	Incorrect
G11	106	288	bope	bawp	Mismatching	0.45	Dissimilar	Different	0	Correct
G11	107	66	faf	faf	Matching	0.83	Similar	Same	1	Correct
G11	108	279	fuf	fuff	Mismatching	0	Dissimilar	Different	0	Correct
G11	109	46	bawp	bawp	Matching	0.01	Dissimilar	Different	0	Incorrect
G11	110	208	bope	bawp	Mismatching	0.45	Dissimilar	Different	0	Correct
G11	111	63	dook	dook	Matching	0.03	Dissimilar	Different	0	Incorrect
G11	112	341	dook	dook	Matching	S.Eng	S.Eng	Different	0	Incorrect
G11	113	391	fof	fof	Matching	S.Eng	S.Eng	Same	1	Correct
G11	114	241	barp	barp	Matching	0.15	Dissimilar	Same	1	Correct
G11	115	3	barp	bipe	Mismatching	0.15	Dissimilar	Different	0	Correct
G11	116	363	bawp	bawp	Matching	S.Eng	S.Eng	Different	0	Incorrect
G11	117	347	fif	faf	Mismatching	S.Eng	S.Eng	Different	0	Correct
G11	118	197	fof	fuff	Mismatching	0	Dissimilar	Different	0	Correct
G11	119	126	bipe	bipe	Matching	1	Similar	Same	1	Correct
G11	120	163	barp	bipe	Mismatching	0.85	Similar	Different	0	Correct
G11	121	25	durk	durk	Matching	0.2	Dissimilar	Different	0	Incorrect
G11	122	257	dake	deek	Mismatching	0.93	Similar	Different	0	Correct
G11	123	296	dake	dake	Matching	0.99	Similar	Same	1	Correct
G11	124	225	durk	durk	Matching	0.99	Similar	Same	1	Correct
G11	125	153	fuf	fif	Mismatching	0.11	Dissimilar	Different	0	Correct
G11	126	179	dake	durk	Mismatching	0.2	Dissimilar	Different	0	Correct
G11	127	295	bowp	bowp	Matching	0.9	Similar	Same	1	Correct
G11	128	102	durk	dake	Mismatching	0.99	Similar	Different	0	Correct
G11	129	205	bipe	bawp	Mismatching	0.45	Dissimilar	Different	0	Correct
G11	130	189	faf	fuf	Mismatching	0.59	Similar	Same	1	Incorrect
G11	131	310	fof	fif	Mismatching	0.97	Similar	Different	0	Correct
G11	132	252	bipe	bowp	Mismatching	0.94	Similar	Different	0	Correct
G11	133	81	barp	barp	Matching	0.9	Similar	Same	1	Correct
G11	134	11	bipe	bope	Mismatching	0.85	Similar	Different	0	Correct
G11	135	390	fof	fif	Mismatching	S.Eng	S.Eng	Different	0	Correct
G11	136	312	fuf	faf	Mismatching	1	Similar	Same	1	Incorrect
G11	137	119	fuff	fuf	Mismatching	0	Dissimilar	Different	0	Correct
G11	138	156	fuff	faf	Mismatching	0	Dissimilar	Same	1	Incorrect
G11	139	64	dook	durk	Mismatching	0.03	Dissimilar	Different	0	Correct
G11	140	83	bawp	bawp	Matching	0.45	Dissimilar	Different	0	Incorrect
G11	141	243	barp	bipe	Mismatching	0.85	Similar	Different	0	Correct
G11	142	307	fif	faf	Mismatching	1	Similar	Different	0	Correct
G11	143	151	fof	fof	Matching	0.01	Dissimilar	Same	1	Correct
G11	144	15	bowp	bowp	Matching	0.94	Similar	Same	1	Correct
G11	145	383	durk	deek	Mismatching	S.Eng	S.Eng	Different	0	Correct
G11	146	20	deek	deek	Matching	0.93	Similar	Same	1	Correct
G11	147	136	dake	dake	Matching	0.99	Similar	Same	1	Correct
G11	148	305	durk	durk	Matching	0.99	Similar	Same	1	Correct
G11	149	293	bowp	bipe	Mismatching	1	Similar	Different	0	Correct
G11	150	187	faf	fif	Mismatching	0.89	Similar	Different	0	Correct
G11	151	77	fof	fuff	Mismatching	0	Dissimilar	Same	1	Incorrect
G11	152	282	bawp	barp	Mismatching	0.9	Similar	Different	0	Correct
G11	153	290	bope	bope	Matching	0	Dissimilar	Different	0	Incorrect
G11	154	218	deek	deek	Matching	0.44	Dissimilar	Same	1	Correct
G11	155	388	fif	fif	Matching	S.Eng	S.Eng	Same	1	Correct
G11	156	121	barp	barp	Matching	0.9	Similar	Same	1	Correct
G11	157	398	fuff	fof	Mismatching	S.Eng	S.Eng	Same	1	Incorrect
G11	158	171	bipe	bope	Mismatching	0.02	Dissimilar	Different	0	Correct
G11	159	237	fuff	fif	Mismatching	0.97	Similar	Different	0	Correct
G11	160	207	bope	barp	Mismatching	0.9	Similar	Different	0	Correct
G11	161	232	fuf	faf	Mismatching	1	Similar	Same	1	Incorrect
G11	162	335	bowp	bowp	Matching	S.Eng	S.Eng	Same	1	Correct
G11	163	39	fuf	fuff	Mismatching	0.59	Similar	Different	0	Correct
G11	164	256	dake	dake	Matching	1	Similar	Same	1	Correct
G11	165	118	fuff	fof	Mismatching	0	Dissimilar	Same	1	Incorrect
G11	166	211	bowp	barp	Mismatching	0.9	Similar	Different	0	Correct
G11	167	147	fif	faf	Mismatching	0.97	Similar	Different	0	Correct
G11	168	24	dook	durk	Mismatching	0.03	Dissimilar	Different	0	Correct
G11	169	366	bipe	bipe	Matching	S.Eng	S.Eng	Same	1	Correct
G11	170	45	barp	bowp	Mismatching	0.15	Dissimilar	Different	0	Correct
G11	171	94	bowp	bope	Mismatching	0.9	Similar	Different	0	Correct
G11	172	96	dake	dake	Matching	0.99	Similar	Same	1	Correct
G11	173	166	bawp	bawp	Matching	0.01	Dissimilar	Same	1	Correct
G11	174	6	bawp	bawp	Matching	0.01	Dissimilar	Different	0	Incorrect
G11	175	209	bope	bipe	Mismatching	1	Similar	Different	0	Correct
G11	176	78	fuf	fuf	Matching	0.59	Similar	Same	1	Correct
G11	177	145	durk	durk	Matching	0.99	Similar	Same	1	Correct
G11	178	87	bope	barp	Mismatching	0	Dissimilar	Different	0	Correct
G11	179	321	barp	barp	Matching	S.Eng	S.Eng	Same	1	Correct
G11	180	74	fif	fuff	Mismatching	0.89	Similar	Same	1	Incorrect
G11	181	367	bope	barp	Mismatching	S.Eng	S.Eng	Different	0	Correct
G11	182	389	fof	faf	Mismatching	S.Eng	S.Eng	Same	1	Incorrect
G11	183	270	faf	fuff	Mismatching	0	Dissimilar	Same	1	Incorrect
G11	184	273	fif	fuf	Mismatching	0.59	Similar	Different	0	Correct
G11	185	134	bowp	bope	Mismatching	0.9	Similar	Different	0	Correct
G11	186	32	fif	fof	Mismatching	0.89	Similar	Different	0	Correct
G11	187	198	fuf	fuf	Matching	0.59	Similar	Different	0	Incorrect
G11	188	368	bope	bawp	Mismatching	S.Eng	S.Eng	Different	0	Correct
G11	189	374	bowp	bope	Mismatching	S.Eng	S.Eng	Different	0	Correct
G11	190	371	bowp	barp	Mismatching	S.Eng	S.Eng	Same	1	Incorrect
G11	191	337	deek	dake	Mismatching	S.Eng	S.Eng	Different	0	Correct
G11	192	379	dook	dake	Mismatching	S.Eng	S.Eng	Different	0	Correct
G11	193	157	fuff	fif	Mismatching	0	Dissimilar	Different	0	Correct
G11	194	258	dake	dook	Mismatching	0.03	Dissimilar	Different	0	Correct
G11	195	38	fuf	fuf	Matching	0.59	Similar	Same	1	Correct
G11	196	396	fuff	faf	Mismatching	S.Eng	S.Eng	Different	0	Correct
G11	197	188	faf	fof	Mismatching	0	Dissimilar	Same	1	Incorrect
G11	198	22	deek	durk	Mismatching	0.93	Similar	Different	0	Correct
G11	199	104	durk	dook	Mismatching	0.99	Similar	Different	0	Correct
G11	200	399	fuff	fuf	Mismatching	S.Eng	S.Eng	Different	0	Correct
G11	201	325	bipe	bawp	Mismatching	S.Eng	S.Eng	Different	0	Correct
G11	202	332	bowp	bawp	Mismatching	S.Eng	S.Eng	Different	0	Correct
G11	203	222	durk	dake	Mismatching	0.99	Similar	Different	0	Correct
G11	204	294	bowp	bope	Mismatching	0	Dissimilar	Different	0	Correct
G11	205	150	fof	fif	Mismatching	0.01	Dissimilar	Different	0	Correct
G11	206	334	bowp	bope	Mismatching	S.Eng	S.Eng	Different	0	Correct
G11	207	317	fuff	fif	Mismatching	0.97	Similar	Different	0	Correct
G11	208	137	deek	dake	Mismatching	0.44	Dissimilar	Different	0	Correct
G11	209	161	barp	barp	Matching	0.15	Dissimilar	Same	1	Correct
G11	210	351	fof	fof	Matching	S.Eng	S.Eng	Same	1	Correct
G11	211	298	deek	deek	Matching	0.44	Dissimilar	Same	1	Correct
G11	212	339	dook	dake	Mismatching	S.Eng	S.Eng	Different	0	Correct
G11	213	345	durk	durk	Matching	S.Eng	S.Eng	Same	1	Correct
G11	214	309	fof	faf	Mismatching	1	Similar	Same	1	Incorrect
G11	215	175	bowp	bowp	Matching	0.94	Similar	Same	1	Correct
G11	216	344	durk	dook	Mismatching	S.Eng	S.Eng	Different	0	Correct
G11	217	378	deek	deek	Matching	S.Eng	S.Eng	Same	1	Correct
G11	218	377	deek	dake	Mismatching	S.Eng	S.Eng	Different	0	Correct
G11	219	58	dake	dook	Mismatching	1	Similar	Different	0	Correct
G11	220	266	faf	faf	Matching	0.83	Similar	Same	1	Correct
G11	221	152	fuf	faf	Mismatching	0.11	Dissimilar	Same	1	Incorrect
G11	222	306	faf	faf	Matching	1	Similar	Same	1	Correct
G11	223	234	fuf	fof	Mismatching	0.01	Dissimilar	Same	1	Incorrect
G11	224	84	bipe	barp	Mismatching	1	Similar	Different	0	Correct
G11	225	195	fof	fof	Matching	0	Dissimilar	Same	1	Correct
G11	226	7	bawp	bipe	Mismatching	0.01	Dissimilar	Different	0	Correct
G11	227	359	fuff	fuf	Mismatching	S.Eng	S.Eng	Different	0	Correct
G11	228	206	bipe	bipe	Matching	1	Similar	Same	1	Correct
G11	229	204	bipe	barp	Mismatching	0.9	Similar	Different	0	Correct
G11	230	297	deek	dake	Mismatching	0.99	Similar	Different	0	Correct
G11	231	47	bawp	bipe	Mismatching	0.01	Dissimilar	Different	0	Correct
G11	232	277	fof	fuff	Mismatching	0	Dissimilar	Same	1	Incorrect
G11	233	220	dook	deek	Mismatching	0.44	Dissimilar	Different	0	Correct
G11	234	148	fif	fif	Matching	0.97	Similar	Same	1	Correct
G11	235	247	bawp	bipe	Mismatching	0.85	Similar	Different	0	Correct
G11	236	245	barp	bowp	Mismatching	0.94	Similar	Different	0	Correct
G11	237	228	fif	fif	Matching	0.97	Similar	Same	1	Correct
G11	238	28	faf	fof	Mismatching	0.83	Similar	Same	1	Incorrect
G11	239	240	fuff	fuff	Matching	0	Dissimilar	Different	0	Incorrect
G11	240	164	barp	bope	Mismatching	0.02	Dissimilar	Different	0	Correct
G11	241	27	faf	fif	Mismatching	0.83	Similar	Different	0	Correct
G11	242	12	bipe	bowp	Mismatching	0.85	Similar	Different	0	Correct
G11	243	67	faf	fif	Mismatching	0.83	Similar	Different	0	Correct
G11	244	168	bawp	bope	Mismatching	0.02	Dissimilar	Different	0	Correct
G11	245	146	faf	faf	Matching	1	Similar	Same	1	Correct
G11	246	184	dook	durk	Mismatching	0.2	Dissimilar	Different	0	Correct
G11	247	210	bope	bope	Matching	0	Dissimilar	Different	0	Incorrect
G11	248	91	bowp	barp	Mismatching	0.9	Similar	Same	1	Incorrect
G11	249	267	faf	fif	Mismatching	0.89	Similar	Different	0	Correct
G11	250	44	barp	bope	Mismatching	0.15	Dissimilar	Different	0	Correct
G11	251	274	fif	fuff	Mismatching	0	Dissimilar	Different	0	Correct
G11	252	291	bowp	barp	Mismatching	0.9	Similar	Different	0	Correct
G11	253	276	fof	fuf	Mismatching	0.59	Similar	Same	1	Incorrect
G11	254	30	faf	fuff	Mismatching	0.83	Similar	Different	0	Correct
G11	255	250	bipe	bipe	Matching	0.85	Similar	Same	1	Correct
G11	256	36	fof	fuf	Mismatching	0	Dissimilar	Same	1	Incorrect
G11	257	172	bipe	bowp	Mismatching	0.94	Similar	Different	0	Correct
G11	258	229	fof	faf	Mismatching	1	Similar	Same	1	Incorrect
G11	259	5	barp	bowp	Mismatching	0.15	Dissimilar	Different	0	Correct
G11	260	311	fof	fof	Matching	0.01	Dissimilar	Same	1	Correct
G11	261	329	bope	bipe	Mismatching	S.Eng	S.Eng	Different	0	Correct
G11	262	140	dook	deek	Mismatching	0	Dissimilar	Different	0	Correct
G11	263	370	bope	bope	Matching	S.Eng	S.Eng	Same	1	Correct
G11	264	350	fof	fif	Mismatching	S.Eng	S.Eng	Different	0	Correct
G11	265	392	fuf	faf	Mismatching	S.Eng	S.Eng	Same	1	Incorrect
G11	266	212	bowp	bawp	Mismatching	0.45	Dissimilar	Different	0	Correct
G11	267	123	bawp	bawp	Matching	0.45	Dissimilar	Same	1	Correct
G11	268	219	dook	dake	Mismatching	0.99	Similar	Different	0	Correct
G11	269	80	fuff	fuff	Matching	0	Dissimilar	Different	0	Incorrect
G11	270	71	fif	fif	Matching	0.89	Similar	Different	0	Incorrect
G11	271	394	fuf	fof	Mismatching	S.Eng	S.Eng	Same	1	Incorrect
G11	272	214	bowp	bope	Mismatching	0	Dissimilar	Same	1	Incorrect
G11	273	342	durk	dake	Mismatching	S.Eng	S.Eng	Different	0	Correct
G11	274	381	dook	dook	Matching	S.Eng	S.Eng	Same	1	Correct
G11	275	346	faf	faf	Matching	S.Eng	S.Eng	Same	1	Correct
G11	276	105	durk	durk	Matching	0.99	Similar	Same	1	Correct
G11	277	33	fif	fuf	Mismatching	0.89	Similar	Different	0	Correct
G11	278	236	fuff	faf	Mismatching	1	Similar	Different	0	Correct
G11	279	167	bawp	bipe	Mismatching	0.85	Similar	Different	0	Correct
G11	280	180	deek	deek	Matching	0.93	Similar	Same	1	Correct
G11	281	221	dook	dook	Matching	0	Dissimilar	Same	1	Correct
G11	282	26	faf	faf	Matching	0.83	Similar	Same	1	Correct
G11	283	50	bipe	bipe	Matching	0.85	Similar	Same	1	Correct
G11	284	330	bope	bope	Matching	S.Eng	S.Eng	Same	1	Correct
G11	285	336	dake	dake	Matching	S.Eng	S.Eng	Same	1	Correct
G11	286	233	fuf	fif	Mismatching	0.97	Similar	Different	0	Correct
G11	287	29	faf	fuf	Mismatching	0.83	Similar	Same	1	Incorrect
G11	288	70	faf	fuff	Mismatching	0.83	Similar	Different	0	Correct
G11	289	13	bope	bope	Matching	0.02	Dissimilar	Same	1	Correct
G11	290	79	fuf	fuff	Mismatching	0.59	Similar	Different	0	Correct
G11	291	129	bope	bipe	Mismatching	0	Dissimilar	Different	0	Correct
G11	292	292	bowp	bawp	Mismatching	0.45	Dissimilar	Different	0	Correct
G11	293	324	bipe	barp	Mismatching	S.Eng	S.Eng	Different	0	Correct
G11	294	133	bowp	bipe	Mismatching	0.9	Similar	Same	1	Incorrect
G11	295	120	fuff	fuff	Matching	0	Dissimilar	Different	0	Incorrect
G11	296	333	bowp	bipe	Mismatching	S.Eng	S.Eng	Different	0	Correct
G11	297	173	bope	bope	Matching	0.02	Dissimilar	Same	1	Correct
G11	298	190	faf	fuff	Mismatching	0	Dissimilar	Same	1	Incorrect
G11	299	202	bawp	barp	Mismatching	0.9	Similar	Different	0	Correct
G11	300	303	durk	deek	Mismatching	0.44	Dissimilar	Different	0	Correct
G11	301	382	durk	dake	Mismatching	S.Eng	S.Eng	Different	0	Correct
G11	302	144	durk	dook	Mismatching	0.99	Similar	Different	0	Correct
G11	303	18	dake	dook	Mismatching	1	Similar	Different	0	Correct
G11	304	130	bope	bope	Matching	0	Dissimilar	Different	0	Incorrect
G11	305	100	dook	deek	Mismatching	0	Dissimilar	Different	0	Correct
G11	306	76	fof	fuf	Mismatching	0	Dissimilar	Same	1	Incorrect
G11	307	269	faf	fuf	Mismatching	0.59	Similar	Same	1	Incorrect
G11	308	278	fuf	fuf	Matching	0.59	Similar	Same	1	Correct
G11	309	115	fuf	fuf	Matching	0.11	Dissimilar	Same	1	Correct
G11	310	199	fuf	fuff	Mismatching	0	Dissimilar	Same	1	Incorrect
G11	311	314	fuf	fof	Mismatching	0.01	Dissimilar	Same	1	Incorrect
G11	312	340	dook	deek	Mismatching	S.Eng	S.Eng	Different	0	Correct
G11	314	223	durk	deek	Mismatching	0.44	Dissimilar	Same	1	Incorrect
G11	315	322	bawp	barp	Mismatching	S.Eng	S.Eng	Different	0	Correct
G11	316	9	bawp	bowp	Mismatching	0.01	Dissimilar	Different	0	Correct
G11	317	262	deek	durk	Mismatching	0.2	Dissimilar	Different	0	Correct
G11	318	289	bope	bipe	Mismatching	1	Similar	Different	0	Correct
G11	319	132	bowp	bawp	Mismatching	0.9	Similar	Different	0	Correct
G11	320	109	fof	faf	Mismatching	0.01	Dissimilar	Same	1	Incorrect
G11	321	177	dake	deek	Mismatching	0.93	Similar	Different	0	Correct
G11	322	178	dake	dook	Mismatching	0.03	Dissimilar	Different	0	Correct
G11	323	201	barp	barp	Matching	0.9	Similar	Same	1	Correct
G11	324	397	fuff	fif	Mismatching	S.Eng	S.Eng	Same	1	Incorrect
G11	325	135	bowp	bowp	Matching	0.9	Similar	Same	1	Correct
G11	326	89	bope	bipe	Mismatching	0	Dissimilar	Different	0	Correct
G11	327	380	dook	deek	Mismatching	S.Eng	S.Eng	Same	1	Incorrect
G11	328	169	bawp	bowp	Mismatching	0.94	Similar	Different	0	Correct
G11	329	97	deek	dake	Mismatching	0.44	Dissimilar	Different	0	Correct
G11	330	281	barp	barp	Matching	0.9	Similar	Same	1	Correct
G11	331	142	durk	dake	Mismatching	0.99	Similar	Different	0	Correct
G11	332	313	fuf	fif	Mismatching	0.97	Similar	Different	0	Correct
G11	333	181	deek	dook	Mismatching	0.03	Dissimilar	Different	0	Correct
G11	334	117	fuff	fif	Mismatching	0	Dissimilar	Different	0	Correct
G11	335	203	bawp	bawp	Matching	0.45	Dissimilar	Same	1	Correct
G11	336	246	bawp	bawp	Matching	0.01	Dissimilar	Same	1	Correct
G11	337	101	dook	dook	Matching	0	Dissimilar	Same	1	Correct
G11	338	196	fof	fuf	Mismatching	0.59	Similar	Same	1	Incorrect
G11	339	255	bowp	bowp	Matching	0.94	Similar	Different	0	Incorrect
G11	340	259	dake	durk	Mismatching	0.2	Dissimilar	Different	0	Correct
G11	341	227	fif	faf	Mismatching	1	Similar	Different	0	Correct
G11	342	122	bawp	barp	Mismatching	0.45	Dissimilar	Different	0	Correct
G11	343	165	barp	bowp	Mismatching	0.94	Similar	Different	0	Correct
G11	344	155	fuf	fuf	Matching	0.11	Dissimilar	Different	0	Incorrect
G11	345	68	faf	fof	Mismatching	0.83	Similar	Same	1	Incorrect
G11	346	355	fuf	fuf	Matching	S.Eng	S.Eng	Same	1	Correct
G11	347	338	deek	deek	Matching	S.Eng	S.Eng	Same	1	Correct
G11	348	216	dake	dake	Matching	0.99	Similar	Same	1	Correct
G11	349	49	bawp	bowp	Mismatching	0.01	Dissimilar	Different	0	Correct
G11	350	14	bope	bowp	Mismatching	0.02	Dissimilar	Different	0	Correct
G11	351	304	durk	dook	Mismatching	0	Dissimilar	Different	0	Correct
G11	352	53	bope	bope	Matching	0.02	Dissimilar	Different	0	Incorrect
G11	353	268	faf	fof	Mismatching	0	Dissimilar	Same	1	Incorrect
G11	354	387	fif	faf	Mismatching	S.Eng	S.Eng	Different	0	Correct
G11	355	308	fif	fif	Matching	0.97	Similar	Same	1	Correct
G11	356	316	fuff	faf	Mismatching	1	Similar	Different	0	Correct
G11	357	34	fif	fuff	Mismatching	0.89	Similar	Different	0	Correct
G11	358	400	fuff	fuff	Matching	S.Eng	S.Eng	Same	1	Correct
G11	359	253	bope	bope	Matching	0.02	Dissimilar	Same	1	Correct
G11	360	131	bowp	barp	Mismatching	0.9	Similar	Same	1	Incorrect
G11	361	92	bowp	bawp	Mismatching	0.9	Similar	Different	0	Correct
G11	362	56	dake	dake	Matching	1	Similar	Same	1	Correct
G11	363	213	bowp	bipe	Mismatching	1	Similar	Different	0	Correct
G11	364	230	fof	fif	Mismatching	0.97	Similar	Different	0	Correct
G11	365	16	dake	dake	Matching	1	Similar	Same	1	Correct
G11	366	191	fif	fif	Matching	0.89	Similar	Same	1	Correct
G11	367	40	fuff	fuff	Matching	0	Dissimilar	Different	0	Incorrect
G11	368	287	bope	barp	Mismatching	0.9	Similar	Different	0	Correct
G11	369	73	fif	fuf	Mismatching	0.89	Similar	Different	0	Correct
G11	370	55	bowp	bowp	Matching	0.94	Similar	Same	1	Correct
G11	371	215	bowp	bowp	Matching	0.9	Similar	Different	0	Incorrect
G11	372	301	dook	dook	Matching	0	Dissimilar	Different	0	Incorrect
G11	373	200	fuff	fuff	Matching	0	Dissimilar	Different	0	Incorrect
G11	374	271	fif	fif	Matching	0.89	Similar	Different	0	Incorrect
G11	375	302	durk	dake	Mismatching	0.99	Similar	Different	0	Correct
G11	376	31	fif	fif	Matching	0.89	Similar	Same	1	Correct
G11	377	159	fuff	fuf	Mismatching	0	Dissimilar	Same	1	Incorrect
G11	378	110	fof	fif	Mismatching	0.01	Dissimilar	Different	0	Correct
G11	379	103	durk	deek	Mismatching	0.99	Similar	Different	0	Correct
G11	380	128	bope	bawp	Mismatching	0	Dissimilar	Different	0	Correct
G11	381	249	bawp	bowp	Mismatching	0.94	Similar	Different	0	Correct
G11	382	349	fof	faf	Mismatching	S.Eng	S.Eng	Same	1	Incorrect
G11	383	98	deek	deek	Matching	0.44	Dissimilar	Same	1	Correct
G11	384	158	fuff	fof	Mismatching	0	Dissimilar	Same	1	Incorrect
G11	385	362	bawp	barp	Mismatching	S.Eng	S.Eng	Different	0	Correct
G11	386	395	fuf	fuf	Matching	S.Eng	S.Eng	Same	1	Correct
G11	387	375	bowp	bowp	Matching	S.Eng	S.Eng	Same	1	Correct
G11	388	125	bipe	bawp	Mismatching	1	Similar	Different	0	Correct
G11	389	4	barp	bope	Mismatching	0.15	Dissimilar	Different	0	Correct
G11	390	364	bipe	barp	Mismatching	S.Eng	S.Eng	Different	0	Correct
G11	391	1	barp	barp	Matching	0.15	Dissimilar	Same	1	Correct
G11	392	328	bope	bawp	Mismatching	S.Eng	S.Eng	Different	0	Correct
G11	393	139	dook	dake	Mismatching	0	Dissimilar	Different	0	Correct
G11	394	59	dake	durk	Mismatching	1	Similar	Different	0	Correct
G11	395	82	bawp	barp	Mismatching	0.45	Dissimilar	Different	0	Correct
G11	396	326	bipe	bipe	Matching	S.Eng	S.Eng	Same	1	Correct
G11	397	372	bowp	bawp	Mismatching	S.Eng	S.Eng	Different	0	Correct
G11	398	21	deek	dook	Mismatching	0.93	Similar	Different	0	Correct
G11	399	65	durk	durk	Matching	0.2	Dissimilar	Different	0	Incorrect
G11	400	182	deek	durk	Mismatching	0.2	Dissimilar	Different	0	Correct
G12	1	389	fof	faf	Mismatching	S.Eng	S.Eng	Different	0	Correct
G12	2	98	deek	deek	Matching	0.44	Dissimilar	Same	1	Correct
G12	3	240	fuff	fuff	Matching	0	Dissimilar	Different	0	Incorrect
G12	4	397	fuff	fif	Mismatching	S.Eng	S.Eng	Same	1	Incorrect
G12	5	122	bawp	barp	Mismatching	0.45	Dissimilar	Different	0	Correct
G12	6	82	bawp	barp	Mismatching	0.45	Dissimilar	Same	1	Incorrect
G12	7	230	fof	fif	Mismatching	0.97	Similar	Different	0	Correct
G12	8	143	durk	deek	Mismatching	0.99	Similar	Different	0	Correct
G12	9	31	fif	fif	Matching	0.89	Similar	Same	1	Correct
G12	10	140	dook	deek	Mismatching	0	Dissimilar	Different	0	Correct
G12	11	318	fuff	fof	Mismatching	0.01	Dissimilar	Different	0	Correct
G12	12	279	fuf	fuff	Mismatching	0	Dissimilar	Same	1	Incorrect
G12	13	16	dake	dake	Matching	1	Similar	Same	1	Correct
G12	14	227	fif	faf	Mismatching	1	Similar	Different	0	Correct
G12	15	155	fuf	fuf	Matching	0.11	Dissimilar	Different	0	Incorrect
G12	16	249	bawp	bowp	Mismatching	0.94	Similar	Different	0	Correct
G12	17	136	dake	dake	Matching	0.99	Similar	Same	1	Correct
G12	18	307	fif	faf	Mismatching	1	Similar	Different	0	Correct
G12	19	125	bipe	bawp	Mismatching	1	Similar	Different	0	Correct
G12	20	120	fuff	fuff	Matching	0	Dissimilar	Same	1	Correct
G12	21	157	fuff	fif	Mismatching	0	Dissimilar	Different	0	Correct
G12	22	362	bawp	barp	Mismatching	S.Eng	S.Eng	Different	0	Correct
G12	23	162	barp	bawp	Mismatching	0.01	Dissimilar	Different	0	Correct
G12	24	90	bope	bope	Matching	0	Dissimilar	Same	1	Correct
G12	25	79	fuf	fuff	Mismatching	0.59	Similar	Different	0	Correct
G12	26	180	deek	deek	Matching	0.93	Similar	Same	1	Correct
G12	27	186	faf	faf	Matching	0.83	Similar	Same	1	Correct
G12	28	55	bowp	bowp	Matching	0.94	Similar	Same	1	Correct
G12	29	374	bowp	bope	Mismatching	S.Eng	S.Eng	Different	0	Correct
G12	30	6	bawp	bawp	Matching	0.01	Dissimilar	Same	1	Correct
G12	31	139	dook	dake	Mismatching	0	Dissimilar	Different	0	Correct
G12	32	138	deek	deek	Matching	0.44	Dissimilar	Same	1	Correct
G12	33	30	faf	fuff	Mismatching	0.83	Similar	Different	0	Correct
G12	34	91	bowp	barp	Mismatching	0.9	Similar	Same	1	Incorrect
G12	35	178	dake	dook	Mismatching	0.03	Dissimilar	Different	0	Correct
G12	36	280	fuff	fuff	Matching	0	Dissimilar	Different	0	Incorrect
G12	37	353	fuf	fif	Mismatching	S.Eng	S.Eng	Different	0	Correct
G12	38	166	bawp	bawp	Matching	0.01	Dissimilar	Same	1	Correct
G12	39	370	bope	bope	Matching	S.Eng	S.Eng	Same	1	Correct
G12	40	291	bowp	barp	Mismatching	0.9	Similar	Same	1	Incorrect
G12	41	208	bope	bawp	Mismatching	0.45	Dissimilar	Different	0	Correct
G12	42	51	bipe	bope	Mismatching	0.85	Similar	Different	0	Correct
G12	43	38	fuf	fuf	Matching	0.59	Similar	Same	1	Correct
G12	44	176	dake	dake	Matching	1	Similar	Same	1	Correct
G12	45	325	bipe	bawp	Mismatching	S.Eng	S.Eng	Different	0	Correct
G12	46	89	bope	bipe	Mismatching	0	Dissimilar	Different	0	Correct
G12	47	388	fif	fif	Matching	S.Eng	S.Eng	Same	1	Correct
G12	48	11	bipe	bope	Mismatching	0.85	Similar	Different	0	Correct
G12	49	391	fof	fof	Matching	S.Eng	S.Eng	Same	1	Correct
G12	50	223	durk	deek	Mismatching	0.44	Dissimilar	Different	0	Correct
G12	51	145	durk	durk	Matching	0.99	Similar	Same	1	Correct
G12	52	304	durk	dook	Mismatching	0	Dissimilar	Different	0	Correct
G12	53	116	fuff	faf	Mismatching	0	Dissimilar	Different	0	Correct
G12	54	107	fif	faf	Mismatching	0.97	Similar	Different	0	Correct
G12	55	293	bowp	bipe	Mismatching	1	Similar	Different	0	Correct
G12	56	121	barp	barp	Matching	0.9	Similar	Same	1	Correct
G12	57	300	dook	deek	Mismatching	0.44	Dissimilar	Different	0	Correct
G12	58	284	bipe	barp	Mismatching	0.9	Similar	Different	0	Correct
G12	59	187	faf	fif	Mismatching	0.89	Similar	Different	0	Correct
G12	60	93	bowp	bipe	Mismatching	0.9	Similar	Different	0	Correct
G12	61	303	durk	deek	Mismatching	0.44	Dissimilar	Different	0	Correct
G12	62	4	barp	bope	Mismatching	0.15	Dissimilar	Different	0	Correct
G12	63	360	fuff	fuff	Matching	S.Eng	S.Eng	Same	1	Correct
G12	64	219	dook	dake	Mismatching	0.99	Similar	Different	0	Correct
G12	65	45	barp	bowp	Mismatching	0.15	Dissimilar	Different	0	Correct
G12	66	329	bope	bipe	Mismatching	S.Eng	S.Eng	Different	0	Correct
G12	67	274	fif	fuff	Mismatching	0	Dissimilar	Different	0	Correct
G12	68	113	fuf	fif	Mismatching	0.11	Dissimilar	Different	0	Correct
G12	69	8	bawp	bope	Mismatching	0.01	Dissimilar	Different	0	Correct
G12	70	386	faf	faf	Matching	S.Eng	S.Eng	Same	1	Correct
G12	71	22	deek	durk	Mismatching	0.93	Similar	Different	0	Correct
G12	72	216	dake	dake	Matching	0.99	Similar	Same	1	Correct
G12	73	338	deek	deek	Matching	S.Eng	S.Eng	Same	1	Correct
G12	74	276	fof	fuf	Mismatching	0.59	Similar	Same	1	Incorrect
G12	75	137	deek	dake	Mismatching	0.44	Dissimilar	Different	0	Correct
G12	76	220	dook	deek	Mismatching	0.44	Dissimilar	Different	0	Correct
G12	77	148	fif	fif	Matching	0.97	Similar	Same	1	Correct
G12	78	20	deek	deek	Matching	0.93	Similar	Same	1	Correct
G12	79	104	durk	dook	Mismatching	0.99	Similar	Different	0	Correct
G12	80	212	bowp	bawp	Mismatching	0.45	Dissimilar	Different	0	Correct
G12	81	231	fof	fof	Matching	0.01	Dissimilar	Same	1	Correct
G12	82	199	fuf	fuff	Mismatching	0	Dissimilar	Different	0	Correct
G12	83	190	faf	fuff	Mismatching	0	Dissimilar	Different	0	Correct
G12	84	96	dake	dake	Matching	0.99	Similar	Same	1	Correct
G12	85	228	fif	fif	Matching	0.97	Similar	Same	1	Correct
G12	86	10	bipe	bipe	Matching	0.85	Similar	Same	1	Correct
G12	87	311	fof	fof	Matching	0.01	Dissimilar	Same	1	Correct
G12	88	260	deek	deek	Matching	0.93	Similar	Same	1	Correct
G12	89	164	barp	bope	Mismatching	0.02	Dissimilar	Different	0	Correct
G12	90	390	fof	fif	Mismatching	S.Eng	S.Eng	Different	0	Correct
G12	91	7	bawp	bipe	Mismatching	0.01	Dissimilar	Different	0	Correct
G12	92	345	durk	durk	Matching	S.Eng	S.Eng	Same	1	Correct
G12	93	262	deek	durk	Mismatching	0.2	Dissimilar	Different	0	Correct
G12	94	5	barp	bowp	Mismatching	0.15	Dissimilar	Different	0	Correct
G12	95	221	dook	dook	Matching	0	Dissimilar	Same	1	Correct
G12	96	242	barp	bawp	Mismatching	0.01	Dissimilar	Different	0	Correct
G12	97	330	bope	bope	Matching	S.Eng	S.Eng	Same	1	Correct
G12	98	60	deek	deek	Matching	0.93	Similar	Same	1	Correct
G12	99	109	fof	faf	Mismatching	0.01	Dissimilar	Same	1	Incorrect
G12	100	315	fuf	fuf	Matching	0.11	Dissimilar	Different	0	Incorrect
G12	101	369	bope	bipe	Mismatching	S.Eng	S.Eng	Different	0	Correct
G12	102	106	faf	faf	Matching	1	Similar	Same	1	Correct
G12	103	343	durk	deek	Mismatching	S.Eng	S.Eng	Different	0	Correct
G12	104	306	faf	faf	Matching	1	Similar	Same	1	Correct
G12	105	244	barp	bope	Mismatching	0.02	Dissimilar	Different	0	Correct
G12	106	312	fuf	faf	Mismatching	1	Similar	Same	1	Incorrect
G12	107	272	fif	fof	Mismatching	0	Dissimilar	Different	0	Correct
G12	108	287	bope	barp	Mismatching	0.9	Similar	Different	0	Correct
G12	109	313	fuf	fif	Mismatching	0.97	Similar	Different	0	Correct
G12	110	261	deek	dook	Mismatching	0.03	Dissimilar	Different	0	Correct
G12	111	115	fuf	fuf	Matching	0.11	Dissimilar	Same	1	Correct
G12	112	281	barp	barp	Matching	0.9	Similar	Different	0	Incorrect
G12	113	252	bipe	bowp	Mismatching	0.94	Similar	Different	0	Correct
G12	114	72	fif	fof	Mismatching	0.89	Similar	Different	0	Correct
G12	115	392	fuf	faf	Mismatching	S.Eng	S.Eng	Same	1	Incorrect
G12	116	43	barp	bipe	Mismatching	0.15	Dissimilar	Different	0	Correct
G12	117	226	faf	faf	Matching	1	Similar	Same	1	Correct
G12	118	87	bope	barp	Mismatching	0	Dissimilar	Different	0	Correct
G12	119	380	dook	deek	Mismatching	S.Eng	S.Eng	Different	0	Correct
G12	120	358	fuff	fof	Mismatching	S.Eng	S.Eng	Different	0	Correct
G12	121	264	dook	durk	Mismatching	0.2	Dissimilar	Same	1	Incorrect
G12	122	35	fof	fof	Matching	0	Dissimilar	Different	0	Incorrect
G12	123	211	bowp	barp	Mismatching	0.9	Similar	Different	0	Correct
G12	124	210	bope	bope	Matching	0	Dissimilar	Same	1	Correct
G12	125	254	bope	bowp	Mismatching	0.94	Similar	Different	0	Correct
G12	126	197	fof	fuff	Mismatching	0	Dissimilar	Same	1	Incorrect
G12	127	66	faf	faf	Matching	0.83	Similar	Same	1	Correct
G12	128	37	fof	fuff	Mismatching	0	Dissimilar	Different	0	Correct
G12	129	133	bowp	bipe	Mismatching	0.9	Similar	Different	0	Correct
G12	130	105	durk	durk	Matching	0.99	Similar	Same	1	Correct
G12	131	192	fif	fof	Mismatching	0	Dissimilar	Different	0	Correct
G12	132	127	bope	barp	Mismatching	0	Dissimilar	Different	0	Correct
G12	133	352	fuf	faf	Mismatching	S.Eng	S.Eng	Same	1	Incorrect
G12	134	297	deek	dake	Mismatching	0.99	Similar	Different	0	Correct
G12	135	118	fuff	fof	Mismatching	0	Dissimilar	Different	0	Correct
G12	136	195	fof	fof	Matching	0	Dissimilar	Different	0	Incorrect
G12	137	170	bipe	bipe	Matching	0.85	Similar	Same	1	Correct
G12	138	19	dake	durk	Mismatching	1	Similar	Different	0	Correct
G12	139	94	bowp	bope	Mismatching	0.9	Similar	Different	0	Correct
G12	140	134	bowp	bope	Mismatching	0.9	Similar	Same	1	Incorrect
G12	141	381	dook	dook	Matching	S.Eng	S.Eng	Different	0	Incorrect
G12	142	147	fif	faf	Mismatching	0.97	Similar	Different	0	Correct
G12	143	74	fif	fuff	Mismatching	0.89	Similar	Same	1	Incorrect
G12	144	99	dook	dake	Mismatching	0	Dissimilar	Different	0	Correct
G12	145	214	bowp	bope	Mismatching	0	Dissimilar	Different	0	Correct
G12	146	131	bowp	barp	Mismatching	0.9	Similar	Same	1	Incorrect
G12	147	393	fuf	fif	Mismatching	S.Eng	S.Eng	Different	0	Correct
G12	148	84	bipe	barp	Mismatching	1	Similar	Different	0	Correct
G12	149	316	fuff	faf	Mismatching	1	Similar	Different	0	Correct
G12	150	58	dake	dook	Mismatching	1	Similar	Different	0	Correct
G12	151	48	bawp	bope	Mismatching	0.01	Dissimilar	Different	0	Correct
G12	152	342	durk	dake	Mismatching	S.Eng	S.Eng	Different	0	Correct
G12	153	42	barp	bawp	Mismatching	0.15	Dissimilar	Different	0	Correct
G12	154	237	fuff	fif	Mismatching	0.97	Similar	Same	1	Incorrect
G12	155	268	faf	fof	Mismatching	0	Dissimilar	Same	1	Incorrect
G12	156	80	fuff	fuff	Matching	0	Dissimilar	Different	0	Incorrect
G12	157	246	bawp	bawp	Matching	0.01	Dissimilar	Same	1	Correct
G12	158	270	faf	fuff	Mismatching	0	Dissimilar	Different	0	Correct
G12	159	258	dake	dook	Mismatching	0.03	Dissimilar	Different	0	Correct
G12	160	111	fof	fof	Matching	0.01	Dissimilar	Same	1	Correct
G12	161	24	dook	durk	Mismatching	0.03	Dissimilar	Different	0	Correct
G12	162	310	fof	fif	Mismatching	0.97	Similar	Different	0	Correct
G12	163	292	bowp	bawp	Mismatching	0.45	Dissimilar	Different	0	Correct
G12	164	76	fof	fuf	Mismatching	0	Dissimilar	Same	1	Incorrect
G12	165	299	dook	dake	Mismatching	0.99	Similar	Different	0	Correct
G12	166	13	bope	bope	Matching	0.02	Dissimilar	Different	0	Incorrect
G12	167	9	bawp	bowp	Mismatching	0.01	Dissimilar	Different	0	Correct
G12	168	298	deek	deek	Matching	0.44	Dissimilar	Same	1	Correct
G12	169	372	bowp	bawp	Mismatching	S.Eng	S.Eng	Different	0	Correct
G12	170	340	dook	deek	Mismatching	S.Eng	S.Eng	Different	0	Correct
G12	171	289	bope	bipe	Mismatching	1	Similar	Different	0	Correct
G12	172	266	faf	faf	Matching	0.83	Similar	Same	1	Correct
G12	173	235	fuf	fuf	Matching	0.11	Dissimilar	Same	1	Correct
G12	174	337	deek	dake	Mismatching	S.Eng	S.Eng	Different	0	Correct
G12	175	95	bowp	bowp	Matching	0.9	Similar	Same	1	Correct
G12	176	114	fuf	fof	Mismatching	0.11	Dissimilar	Same	1	Incorrect
G12	177	144	durk	dook	Mismatching	0.99	Similar	Different	0	Correct
G12	178	188	faf	fof	Mismatching	0	Dissimilar	Different	0	Correct
G12	179	36	fof	fuf	Mismatching	0	Dissimilar	Same	1	Incorrect
G12	180	159	fuff	fuf	Mismatching	0	Dissimilar	Different	0	Correct
G12	181	339	dook	dake	Mismatching	S.Eng	S.Eng	Different	0	Correct
G12	182	319	fuff	fuf	Mismatching	0.11	Dissimilar	Different	0	Correct
G12	183	173	bope	bope	Matching	0.02	Dissimilar	Different	0	Incorrect
G12	184	253	bope	bope	Matching	0.02	Dissimilar	Different	0	Incorrect
G12	185	273	fif	fuf	Mismatching	0.59	Similar	Different	0	Correct
G12	186	78	fuf	fuf	Matching	0.59	Similar	Different	0	Incorrect
G12	187	167	bawp	bipe	Mismatching	0.85	Similar	Different	0	Correct
G12	188	364	bipe	barp	Mismatching	S.Eng	S.Eng	Different	0	Correct
G12	189	184	dook	durk	Mismatching	0.2	Dissimilar	Different	0	Correct
G12	190	400	fuff	fuff	Matching	S.Eng	S.Eng	Same	1	Correct
G12	191	314	fuf	fof	Mismatching	0.01	Dissimilar	Same	1	Incorrect
G12	192	288	bope	bawp	Mismatching	0.45	Dissimilar	Different	0	Correct
G12	193	348	fif	fif	Matching	S.Eng	S.Eng	Same	1	Correct
G12	194	398	fuff	fof	Mismatching	S.Eng	S.Eng	Different	0	Correct
G12	195	150	fof	fif	Mismatching	0.01	Dissimilar	Different	0	Correct
G12	196	357	fuff	fif	Mismatching	S.Eng	S.Eng	Same	1	Incorrect
G12	197	92	bowp	bawp	Mismatching	0.9	Similar	Different	0	Correct
G12	198	49	bawp	bowp	Mismatching	0.01	Dissimilar	Different	0	Correct
G12	199	128	bope	bawp	Mismatching	0	Dissimilar	Same	1	Incorrect
G12	200	265	durk	durk	Matching	0.2	Dissimilar	Different	0	Incorrect
G12	201	183	dook	dook	Matching	0.03	Dissimilar	Same	1	Correct
G12	202	335	bowp	bowp	Matching	S.Eng	S.Eng	Same	1	Correct
G12	203	14	bope	bowp	Mismatching	0.02	Dissimilar	Different	0	Correct
G12	204	213	bowp	bipe	Mismatching	1	Similar	Different	0	Correct
G12	205	243	barp	bipe	Mismatching	0.85	Similar	Different	0	Correct
G12	206	367	bope	barp	Mismatching	S.Eng	S.Eng	Different	0	Correct
G12	207	255	bowp	bowp	Matching	0.94	Similar	Same	1	Correct
G12	208	278	fuf	fuf	Matching	0.59	Similar	Different	0	Incorrect
G12	209	206	bipe	bipe	Matching	1	Similar	Same	1	Correct
G12	210	193	fif	fuf	Mismatching	0.59	Similar	Different	0	Correct
G12	211	168	bawp	bope	Mismatching	0.02	Dissimilar	Different	0	Correct
G12	212	149	fof	faf	Mismatching	0.01	Dissimilar	Same	1	Incorrect
G12	213	52	bipe	bowp	Mismatching	0.85	Similar	Different	0	Correct
G12	214	375	bowp	bowp	Matching	S.Eng	S.Eng	Same	1	Correct
G12	215	202	bawp	barp	Mismatching	0.9	Similar	Different	0	Correct
G12	216	100	dook	deek	Mismatching	0	Dissimilar	Different	0	Correct
G12	217	361	barp	barp	Matching	S.Eng	S.Eng	Same	1	Correct
G12	218	171	bipe	bope	Mismatching	0.02	Dissimilar	Different	0	Correct
G12	219	305	durk	durk	Matching	0.99	Similar	Same	1	Correct
G12	220	383	durk	deek	Mismatching	S.Eng	S.Eng	Different	0	Correct
G12	221	378	deek	deek	Matching	S.Eng	S.Eng	Same	1	Correct
G12	222	356	fuff	faf	Mismatching	S.Eng	S.Eng	Different	0	Correct
G12	223	67	faf	fif	Mismatching	0.83	Similar	Different	0	Correct
G12	224	15	bowp	bowp	Matching	0.94	Similar	Same	1	Correct
G12	225	174	bope	bowp	Mismatching	0.94	Similar	Different	0	Correct
G12	226	379	dook	dake	Mismatching	S.Eng	S.Eng	Different	0	Correct
G12	227	117	fuff	fif	Mismatching	0	Dissimilar	Different	0	Correct
G12	228	152	fuf	faf	Mismatching	0.11	Dissimilar	Different	0	Correct
G12	229	41	barp	barp	Matching	0.15	Dissimilar	Same	1	Correct
G12	230	359	fuff	fuf	Mismatching	S.Eng	S.Eng	Different	0	Correct
G12	231	277	fof	fuff	Mismatching	0	Dissimilar	Same	1	Incorrect
G12	232	334	bowp	bope	Mismatching	S.Eng	S.Eng	Different	0	Correct
G12	233	324	bipe	barp	Mismatching	S.Eng	S.Eng	Same	1	Incorrect
G12	234	108	fif	fif	Matching	0.97	Similar	Same	1	Correct
G12	235	194	fif	fuff	Mismatching	0	Dissimilar	Different	0	Correct
G12	236	169	bawp	bowp	Mismatching	0.94	Similar	Different	0	Correct
G12	237	320	fuff	fuff	Matching	0	Dissimilar	Same	1	Correct
G12	238	233	fuf	fif	Mismatching	0.97	Similar	Different	0	Correct
G12	239	256	dake	dake	Matching	1	Similar	Same	1	Correct
G12	240	32	fif	fof	Mismatching	0.89	Similar	Same	1	Incorrect
G12	241	322	bawp	barp	Mismatching	S.Eng	S.Eng	Different	0	Correct
G12	242	112	fuf	faf	Mismatching	0.11	Dissimilar	Different	0	Correct
G12	243	198	fuf	fuf	Matching	0.59	Similar	Different	0	Incorrect
G12	244	101	dook	dook	Matching	0	Dissimilar	Same	1	Correct
G12	245	154	fuf	fof	Mismatching	0.11	Dissimilar	Same	1	Incorrect
G12	246	135	bowp	bowp	Matching	0.9	Similar	Same	1	Correct
G12	247	26	faf	faf	Matching	0.83	Similar	Same	1	Correct
G12	248	177	dake	deek	Mismatching	0.93	Similar	Different	0	Correct
G12	249	165	barp	bowp	Mismatching	0.94	Similar	Different	0	Correct
G12	250	160	fuff	fuff	Matching	0	Dissimilar	Different	0	Incorrect
G12	251	57	dake	deek	Mismatching	1	Similar	Different	0	Correct
G12	252	56	dake	dake	Matching	1	Similar	Same	1	Correct
G12	253	355	fuf	fuf	Matching	S.Eng	S.Eng	Same	1	Correct
G12	254	59	dake	durk	Mismatching	1	Similar	Different	0	Correct
G12	255	351	fof	fof	Matching	S.Eng	S.Eng	Same	1	Correct
G12	256	102	durk	dake	Mismatching	0.99	Similar	Different	0	Correct
G12	257	61	deek	dook	Mismatching	0.93	Similar	Same	1	Incorrect
G12	258	384	durk	dook	Mismatching	S.Eng	S.Eng	Different	0	Correct
G12	259	373	bowp	bipe	Mismatching	S.Eng	S.Eng	Different	0	Correct
G12	260	344	durk	dook	Mismatching	S.Eng	S.Eng	Different	0	Correct
G12	261	70	faf	fuff	Mismatching	0.83	Similar	Same	1	Incorrect
G12	262	175	bowp	bowp	Matching	0.94	Similar	Same	1	Correct
G12	263	1	barp	barp	Matching	0.15	Dissimilar	Same	1	Correct
G12	264	2	barp	bawp	Mismatching	0.15	Dissimilar	Different	0	Correct
G12	265	332	bowp	bawp	Mismatching	S.Eng	S.Eng	Different	0	Correct
G12	266	63	dook	dook	Matching	0.03	Dissimilar	Same	1	Correct
G12	267	68	faf	fof	Mismatching	0.83	Similar	Same	1	Incorrect
G12	268	282	bawp	barp	Mismatching	0.9	Similar	Different	0	Correct
G12	269	399	fuff	fuf	Mismatching	S.Eng	S.Eng	Different	0	Correct
G12	270	151	fof	fof	Matching	0.01	Dissimilar	Same	1	Correct
G12	271	371	bowp	barp	Mismatching	S.Eng	S.Eng	Different	0	Correct
G12	272	248	bawp	bope	Mismatching	0.02	Dissimilar	Different	0	Correct
G12	273	196	fof	fuf	Mismatching	0.59	Similar	Same	1	Incorrect
G12	274	132	bowp	bawp	Mismatching	0.9	Similar	Different	0	Correct
G12	275	204	bipe	barp	Mismatching	0.9	Similar	Different	0	Correct
G12	276	23	dook	dook	Matching	0.03	Dissimilar	Same	1	Correct
G12	277	85	bipe	bawp	Mismatching	1	Similar	Different	0	Correct
G12	278	363	bawp	bawp	Matching	S.Eng	S.Eng	Same	1	Correct
G12	279	238	fuff	fof	Mismatching	0.01	Dissimilar	Same	1	Incorrect
G12	280	123	bawp	bawp	Matching	0.45	Dissimilar	Same	1	Correct
G12	281	126	bipe	bipe	Matching	1	Similar	Same	1	Correct
G12	282	75	fof	fof	Matching	0	Dissimilar	Same	1	Correct
G12	283	250	bipe	bipe	Matching	0.85	Similar	Same	1	Correct
G12	284	308	fif	fif	Matching	0.97	Similar	Same	1	Correct
G12	285	47	bawp	bipe	Mismatching	0.01	Dissimilar	Different	0	Correct
G12	286	349	fof	faf	Mismatching	S.Eng	S.Eng	Different	0	Correct
G12	287	232	fuf	faf	Mismatching	1	Similar	Same	1	Incorrect
G12	288	333	bowp	bipe	Mismatching	S.Eng	S.Eng	Different	0	Correct
G12	289	385	durk	durk	Matching	S.Eng	S.Eng	Same	1	Correct
G12	290	83	bawp	bawp	Matching	0.45	Dissimilar	Same	1	Correct
G12	291	50	bipe	bipe	Matching	0.85	Similar	Same	1	Correct
G12	292	245	barp	bowp	Mismatching	0.94	Similar	Same	1	Incorrect
G12	293	141	dook	dook	Matching	0	Dissimilar	Same	1	Correct
G12	294	189	faf	fuf	Mismatching	0.59	Similar	Different	0	Correct
G12	295	179	dake	durk	Mismatching	0.2	Dissimilar	Same	1	Incorrect
G12	296	247	bawp	bipe	Mismatching	0.85	Similar	Different	0	Correct
G12	297	224	durk	dook	Mismatching	0	Dissimilar	Different	0	Correct
G12	298	215	bowp	bowp	Matching	0.9	Similar	Same	1	Correct
G12	299	257	dake	deek	Mismatching	0.93	Similar	Different	0	Correct
G12	300	286	bipe	bipe	Matching	1	Similar	Same	1	Correct
G12	301	146	faf	faf	Matching	1	Similar	Same	1	Correct
G12	302	203	bawp	bawp	Matching	0.45	Dissimilar	Same	1	Correct
G12	303	209	bope	bipe	Mismatching	1	Similar	Different	0	Correct
G12	304	62	deek	durk	Mismatching	0.93	Similar	Different	0	Correct
G12	305	218	deek	deek	Matching	0.44	Dissimilar	Same	1	Correct
G12	306	269	faf	fuf	Mismatching	0.59	Similar	Different	0	Correct
G12	307	396	fuff	faf	Mismatching	S.Eng	S.Eng	Different	0	Correct
G12	308	71	fif	fif	Matching	0.89	Similar	Same	1	Correct
G12	309	18	dake	dook	Mismatching	1	Similar	Different	0	Correct
G12	310	229	fof	faf	Mismatching	1	Similar	Different	0	Correct
G12	311	309	fof	faf	Mismatching	1	Similar	Same	1	Incorrect
G12	312	296	dake	dake	Matching	0.99	Similar	Different	0	Incorrect
G12	313	225	durk	durk	Matching	0.99	Similar	Same	1	Correct
G12	314	40	fuff	fuff	Matching	0	Dissimilar	Different	0	Incorrect
G12	315	181	deek	dook	Mismatching	0.03	Dissimilar	Different	0	Correct
G12	316	366	bipe	bipe	Matching	S.Eng	S.Eng	Same	1	Correct
G12	317	336	dake	dake	Matching	S.Eng	S.Eng	Same	1	Correct
G12	318	103	durk	deek	Mismatching	0.99	Similar	Different	0	Correct
G12	319	124	bipe	barp	Mismatching	1	Similar	Different	0	Correct
G12	320	346	faf	faf	Matching	S.Eng	S.Eng	Same	1	Correct
G12	321	27	faf	fif	Mismatching	0.83	Similar	Different	0	Correct
G12	322	295	bowp	bowp	Matching	0.9	Similar	Same	1	Correct
G12	323	17	dake	deek	Mismatching	1	Similar	Different	0	Correct
G12	324	217	deek	dake	Mismatching	0.99	Similar	Different	0	Correct
G12	325	153	fuf	fif	Mismatching	0.11	Dissimilar	Same	1	Incorrect
G12	326	321	barp	barp	Matching	S.Eng	S.Eng	Same	1	Correct
G12	327	267	faf	fif	Mismatching	0.89	Similar	Different	0	Correct
G12	328	354	fuf	fof	Mismatching	S.Eng	S.Eng	Same	1	Incorrect
G12	329	65	durk	durk	Matching	0.2	Dissimilar	Different	0	Incorrect
G12	330	368	bope	bawp	Mismatching	S.Eng	S.Eng	Same	1	Incorrect
G12	331	326	bipe	bipe	Matching	S.Eng	S.Eng	Same	1	Correct
G12	332	201	barp	barp	Matching	0.9	Similar	Same	1	Correct
G12	333	251	bipe	bope	Mismatching	0.02	Dissimilar	Different	0	Correct
G12	334	200	fuff	fuff	Matching	0	Dissimilar	Different	0	Incorrect
G12	335	191	fif	fif	Matching	0.89	Similar	Same	1	Correct
G12	336	34	fif	fuff	Mismatching	0.89	Similar	Same	1	Incorrect
G12	337	317	fuff	fif	Mismatching	0.97	Similar	Same	1	Incorrect
G12	338	259	dake	durk	Mismatching	0.2	Dissimilar	Different	0	Correct
G12	339	387	fif	faf	Mismatching	S.Eng	S.Eng	Different	0	Correct
G12	340	347	fif	faf	Mismatching	S.Eng	S.Eng	Different	0	Correct
G12	341	77	fof	fuff	Mismatching	0	Dissimilar	Different	0	Correct
G12	342	81	barp	barp	Matching	0.9	Similar	Same	1	Correct
G12	343	331	bowp	barp	Mismatching	S.Eng	S.Eng	Different	0	Correct
G12	344	241	barp	barp	Matching	0.15	Dissimilar	Same	1	Correct
G12	345	54	bope	bowp	Mismatching	0.02	Dissimilar	Different	0	Correct
G12	346	382	durk	dake	Mismatching	S.Eng	S.Eng	Different	0	Correct
G12	347	12	bipe	bowp	Mismatching	0.85	Similar	Different	0	Correct
G12	348	236	fuff	faf	Mismatching	1	Similar	Different	0	Correct
G12	349	163	barp	bipe	Mismatching	0.85	Similar	Same	1	Incorrect
G12	350	161	barp	barp	Matching	0.15	Dissimilar	Same	1	Correct
G12	351	377	deek	dake	Mismatching	S.Eng	S.Eng	Different	0	Correct
G12	352	283	bawp	bawp	Matching	0.45	Dissimilar	Different	0	Incorrect
G12	353	64	dook	durk	Mismatching	0.03	Dissimilar	Different	0	Correct
G12	354	88	bope	bawp	Mismatching	0	Dissimilar	Same	1	Incorrect
G12	355	376	dake	dake	Matching	S.Eng	S.Eng	Same	1	Correct
G12	356	29	faf	fuf	Mismatching	0.83	Similar	Same	1	Incorrect
G12	357	323	bawp	bawp	Matching	S.Eng	S.Eng	Same	1	Correct
G12	358	97	deek	dake	Mismatching	0.44	Dissimilar	Different	0	Correct
G12	359	73	fif	fuf	Mismatching	0.89	Similar	Different	0	Correct
G12	360	69	faf	fuf	Mismatching	0.83	Similar	Same	1	Incorrect
G12	361	365	bipe	bawp	Mismatching	S.Eng	S.Eng	Different	0	Correct
G12	362	275	fof	fof	Matching	0	Dissimilar	Same	1	Correct
G12	363	394	fuf	fof	Mismatching	S.Eng	S.Eng	Different	0	Correct
G12	364	156	fuff	faf	Mismatching	0	Dissimilar	Different	0	Correct
G12	365	271	fif	fif	Matching	0.89	Similar	Same	1	Correct
G12	366	3	barp	bipe	Mismatching	0.15	Dissimilar	Different	0	Correct
G12	367	234	fuf	fof	Mismatching	0.01	Dissimilar	Same	1	Incorrect
G12	368	119	fuff	fuf	Mismatching	0	Dissimilar	Different	0	Correct
G12	369	185	durk	durk	Matching	0.2	Dissimilar	Different	0	Incorrect
G12	370	158	fuff	fof	Mismatching	0	Dissimilar	Same	1	Incorrect
G12	371	294	bowp	bope	Mismatching	0	Dissimilar	Different	0	Correct
G12	372	33	fif	fuf	Mismatching	0.89	Similar	Different	0	Correct
G12	373	290	bope	bope	Matching	0	Dissimilar	Different	0	Incorrect
G12	374	142	durk	dake	Mismatching	0.99	Similar	Different	0	Correct
G12	375	130	bope	bope	Matching	0	Dissimilar	Different	0	Incorrect
G12	376	341	dook	dook	Matching	S.Eng	S.Eng	Same	1	Correct
G12	377	327	bope	barp	Mismatching	S.Eng	S.Eng	Different	0	Correct
G12	378	263	dook	dook	Matching	0.03	Dissimilar	Same	1	Correct
G12	379	285	bipe	bawp	Mismatching	0.45	Dissimilar	Different	0	Correct
G12	380	39	fuf	fuff	Mismatching	0.59	Similar	Different	0	Correct
G12	381	350	fof	fif	Mismatching	S.Eng	S.Eng	Different	0	Correct
G12	382	239	fuff	fuf	Mismatching	0.11	Dissimilar	Different	0	Correct
G12	383	205	bipe	bawp	Mismatching	0.45	Dissimilar	Same	1	Incorrect
G12	384	301	dook	dook	Matching	0	Dissimilar	Same	1	Correct
G12	385	222	durk	dake	Mismatching	0.99	Similar	Different	0	Correct
G12	386	172	bipe	bowp	Mismatching	0.94	Similar	Different	0	Correct
G12	387	86	bipe	bipe	Matching	1	Similar	Same	1	Correct
G12	388	110	fof	fif	Mismatching	0.01	Dissimilar	Different	0	Correct
G12	389	302	durk	dake	Mismatching	0.99	Similar	Different	0	Correct
G12	390	207	bope	barp	Mismatching	0.9	Similar	Same	1	Incorrect
G12	391	395	fuf	fuf	Matching	S.Eng	S.Eng	Same	1	Correct
G12	392	28	faf	fof	Mismatching	0.83	Similar	Different	0	Correct
G12	393	44	barp	bope	Mismatching	0.15	Dissimilar	Same	1	Incorrect
G12	394	25	durk	durk	Matching	0.2	Dissimilar	Same	1	Correct
G12	395	53	bope	bope	Matching	0.02	Dissimilar	Same	1	Correct
G12	396	46	bawp	bawp	Matching	0.01	Dissimilar	Same	1	Correct
G12	397	182	deek	durk	Mismatching	0.2	Dissimilar	Different	0	Correct
G12	398	21	deek	dook	Mismatching	0.93	Similar	Different	0	Correct
G12	399	129	bope	bipe	Mismatching	0	Dissimilar	Different	0	Correct
G12	400	328	bope	bawp	Mismatching	S.Eng	S.Eng	Same	1	Incorrect
G13	1	58	dake	dook	Mismatching	1	Similar	Different	0	Correct
G13	2	259	dake	durk	Mismatching	0.2	Dissimilar	Same	1	Incorrect
G13	3	377	deek	dake	Mismatching	S.Eng	S.Eng	Different	0	Correct
G13	4	27	faf	fif	Mismatching	0.83	Similar	Different	0	Correct
G13	5	169	bawp	bowp	Mismatching	0.94	Similar	Same	1	Incorrect
G13	6	78	fuf	fuf	Matching	0.59	Similar	Same	1	Correct
G13	7	311	fof	fof	Matching	0.01	Dissimilar	Different	0	Incorrect
G13	8	329	bope	bipe	Mismatching	S.Eng	S.Eng	Different	0	Correct
G13	10	65	durk	durk	Matching	0.2	Dissimilar	Different	0	Incorrect
G13	11	43	barp	bipe	Mismatching	0.15	Dissimilar	Different	0	Correct
G13	12	40	fuff	fuff	Matching	0	Dissimilar	Same	1	Correct
G13	13	106	faf	faf	Matching	1	Similar	Same	1	Correct
G13	14	36	fof	fuf	Mismatching	0	Dissimilar	Same	1	Incorrect
G13	15	69	faf	fuf	Mismatching	0.83	Similar	Same	1	Incorrect
G13	16	55	bowp	bowp	Matching	0.94	Similar	Same	1	Correct
G13	21	289	bope	bipe	Mismatching	1	Similar	Same	1	Incorrect
G13	22	392	fuf	faf	Mismatching	S.Eng	S.Eng	Same	1	Incorrect
G13	23	243	barp	bipe	Mismatching	0.85	Similar	Different	0	Correct
G13	24	302	durk	dake	Mismatching	0.99	Similar	Same	1	Incorrect
G13	25	273	fif	fuf	Mismatching	0.59	Similar	Different	0	Correct
G13	26	62	deek	durk	Mismatching	0.93	Similar	Different	0	Correct
G13	27	283	bawp	bawp	Matching	0.45	Dissimilar	Same	1	Correct
G13	28	361	barp	barp	Matching	S.Eng	S.Eng	Same	1	Correct
G13	29	351	fof	fof	Matching	S.Eng	S.Eng	Same	1	Correct
G13	30	159	fuff	fuf	Mismatching	0	Dissimilar	Different	0	Correct
G13	31	382	durk	dake	Mismatching	S.Eng	S.Eng	Same	1	Incorrect
G13	32	261	deek	dook	Mismatching	0.03	Dissimilar	Different	0	Correct
G13	33	330	bope	bope	Matching	S.Eng	S.Eng	Same	1	Correct
G13	34	379	dook	dake	Mismatching	S.Eng	S.Eng	Different	0	Correct
G13	35	187	faf	fif	Mismatching	0.89	Similar	Same	1	Incorrect
G13	36	192	fif	fof	Mismatching	0	Dissimilar	Different	0	Correct
G13	37	139	dook	dake	Mismatching	0	Dissimilar	Different	0	Correct
G13	38	317	fuff	fif	Mismatching	0.97	Similar	Different	0	Correct
G13	39	264	dook	durk	Mismatching	0.2	Dissimilar	Different	0	Correct
G13	40	87	bope	barp	Mismatching	0	Dissimilar	Different	0	Correct
G13	41	107	fif	faf	Mismatching	0.97	Similar	Same	1	Incorrect
G13	42	54	bope	bowp	Mismatching	0.02	Dissimilar	Same	1	Incorrect
G13	43	11	bipe	bope	Mismatching	0.85	Similar	Different	0	Correct
G13	44	236	fuff	faf	Mismatching	1	Similar	Same	1	Incorrect
G13	45	179	dake	durk	Mismatching	0.2	Dissimilar	Same	1	Incorrect
G13	46	167	bawp	bipe	Mismatching	0.85	Similar	Different	0	Correct
G13	47	14	bope	bowp	Mismatching	0.02	Dissimilar	Different	0	Correct
G13	48	121	barp	barp	Matching	0.9	Similar	Same	1	Correct
G13	49	32	fif	fof	Mismatching	0.89	Similar	Different	0	Correct
G13	50	204	bipe	barp	Mismatching	0.9	Similar	Different	0	Correct
G13	51	41	barp	barp	Matching	0.15	Dissimilar	Same	1	Correct
G13	52	292	bowp	bawp	Mismatching	0.45	Dissimilar	Different	0	Correct
G13	53	355	fuf	fuf	Matching	S.Eng	S.Eng	Same	1	Correct
G13	54	386	faf	faf	Matching	S.Eng	S.Eng	Same	1	Correct
G13	56	102	durk	dake	Mismatching	0.99	Similar	Different	0	Correct
G13	57	359	fuff	fuf	Mismatching	S.Eng	S.Eng	Different	0	Correct
G13	58	341	dook	dook	Matching	S.Eng	S.Eng	Same	1	Correct
G13	59	20	deek	deek	Matching	0.93	Similar	Same	1	Correct
G13	60	363	bawp	bawp	Matching	S.Eng	S.Eng	Same	1	Correct
G13	61	278	fuf	fuf	Matching	0.59	Similar	Same	1	Correct
G13	62	12	bipe	bowp	Mismatching	0.85	Similar	Different	0	Correct
G13	63	387	fif	faf	Mismatching	S.Eng	S.Eng	Different	0	Correct
G13	64	116	fuff	faf	Mismatching	0	Dissimilar	Same	1	Incorrect
G13	66	61	deek	dook	Mismatching	0.93	Similar	Different	0	Correct
G13	67	13	bope	bope	Matching	0.02	Dissimilar	Different	0	Incorrect
G13	68	118	fuff	fof	Mismatching	0	Dissimilar	Same	1	Incorrect
G13	69	373	bowp	bipe	Mismatching	S.Eng	S.Eng	Different	0	Correct
G13	70	217	deek	dake	Mismatching	0.99	Similar	Different	0	Correct
G13	71	111	fof	fof	Matching	0.01	Dissimilar	Different	0	Incorrect
G13	72	220	dook	deek	Mismatching	0.44	Dissimilar	Different	0	Correct
G13	73	250	bipe	bipe	Matching	0.85	Similar	Different	0	Incorrect
G13	74	229	fof	faf	Mismatching	1	Similar	Different	0	Correct
G13	75	296	dake	dake	Matching	0.99	Similar	Same	1	Correct
G13	76	320	fuff	fuff	Matching	0	Dissimilar	Different	0	Incorrect
G13	77	64	dook	durk	Mismatching	0.03	Dissimilar	Different	0	Correct
G13	78	142	durk	dake	Mismatching	0.99	Similar	Different	0	Correct
G13	79	343	durk	deek	Mismatching	S.Eng	S.Eng	Different	0	Correct
G13	80	79	fuf	fuff	Mismatching	0.59	Similar	Different	0	Correct
G13	81	247	bawp	bipe	Mismatching	0.85	Similar	Different	0	Correct
G13	82	146	faf	faf	Matching	1	Similar	Same	1	Correct
G13	83	369	bope	bipe	Mismatching	S.Eng	S.Eng	Different	0	Correct
G13	84	374	bowp	bope	Mismatching	S.Eng	S.Eng	Different	0	Correct
G13	85	190	faf	fuff	Mismatching	0	Dissimilar	Different	0	Correct
G13	86	42	barp	bawp	Mismatching	0.15	Dissimilar	Different	0	Correct
G13	87	47	bawp	bipe	Mismatching	0.01	Dissimilar	Different	0	Correct
G13	88	393	fuf	fif	Mismatching	S.Eng	S.Eng	Different	0	Correct
G13	89	258	dake	dook	Mismatching	0.03	Dissimilar	Different	0	Correct
G13	90	46	bawp	bawp	Matching	0.01	Dissimilar	Different	0	Incorrect
G13	91	202	bawp	barp	Mismatching	0.9	Similar	Different	0	Correct
G13	92	209	bope	bipe	Mismatching	1	Similar	Different	0	Correct
G13	93	352	fuf	faf	Mismatching	S.Eng	S.Eng	Same	1	Incorrect
G13	94	328	bope	bawp	Mismatching	S.Eng	S.Eng	Different	0	Correct
G13	95	200	fuff	fuff	Matching	0	Dissimilar	Same	1	Correct
G13	97	120	fuff	fuff	Matching	0	Dissimilar	Same	1	Correct
G13	98	326	bipe	bipe	Matching	S.Eng	S.Eng	Same	1	Correct
G13	99	212	bowp	bawp	Mismatching	0.45	Dissimilar	Different	0	Correct
G13	100	272	fif	fof	Mismatching	0	Dissimilar	Different	0	Correct
G13	101	155	fuf	fuf	Matching	0.11	Dissimilar	Different	0	Incorrect
G13	102	350	fof	fif	Mismatching	S.Eng	S.Eng	Different	0	Correct
G13	103	184	dook	durk	Mismatching	0.2	Dissimilar	Different	0	Correct
G13	104	151	fof	fof	Matching	0.01	Dissimilar	Different	0	Incorrect
G13	105	114	fuf	fof	Mismatching	0.11	Dissimilar	Same	1	Incorrect
G13	106	257	dake	deek	Mismatching	0.93	Similar	Different	0	Correct
G13	107	287	bope	barp	Mismatching	0.9	Similar	Different	0	Correct
G13	108	176	dake	dake	Matching	1	Similar	Same	1	Correct
G13	109	268	faf	fof	Mismatching	0	Dissimilar	Same	1	Incorrect
G13	110	103	durk	deek	Mismatching	0.99	Similar	Different	0	Correct
G13	111	375	bowp	bowp	Matching	S.Eng	S.Eng	Same	1	Correct
G13	112	17	dake	deek	Mismatching	1	Similar	Different	0	Correct
G13	113	282	bawp	barp	Mismatching	0.9	Similar	Different	0	Correct
G13	114	74	fif	fuff	Mismatching	0.89	Similar	Same	1	Incorrect
G13	115	362	bawp	barp	Mismatching	S.Eng	S.Eng	Different	0	Correct
G13	116	349	fof	faf	Mismatching	S.Eng	S.Eng	Same	1	Incorrect
G13	117	168	bawp	bope	Mismatching	0.02	Dissimilar	Same	1	Incorrect
G13	118	293	bowp	bipe	Mismatching	1	Similar	Different	0	Correct
G13	119	254	bope	bowp	Mismatching	0.94	Similar	Different	0	Correct
G13	120	339	dook	dake	Mismatching	S.Eng	S.Eng	Different	0	Correct
G13	121	77	fof	fuff	Mismatching	0	Dissimilar	Different	0	Correct
G13	122	72	fif	fof	Mismatching	0.89	Similar	Different	0	Correct
G13	123	45	barp	bowp	Mismatching	0.15	Dissimilar	Different	0	Correct
G13	124	135	bowp	bowp	Matching	0.9	Similar	Same	1	Correct
G13	125	342	durk	dake	Mismatching	S.Eng	S.Eng	Different	0	Correct
G13	127	50	bipe	bipe	Matching	0.85	Similar	Same	1	Correct
G13	128	310	fof	fif	Mismatching	0.97	Similar	Same	1	Incorrect
G13	129	277	fof	fuff	Mismatching	0	Dissimilar	Same	1	Incorrect
G13	130	223	durk	deek	Mismatching	0.44	Dissimilar	Different	0	Correct
G13	131	5	barp	bowp	Mismatching	0.15	Dissimilar	Different	0	Correct
G13	132	237	fuff	fif	Mismatching	0.97	Similar	Same	1	Incorrect
G13	134	226	faf	faf	Matching	1	Similar	Same	1	Correct
G13	135	227	fif	faf	Mismatching	1	Similar	Different	0	Correct
G13	136	309	fof	faf	Mismatching	1	Similar	Different	0	Correct
G13	137	318	fuff	fof	Mismatching	0.01	Dissimilar	Different	0	Correct
G13	138	370	bope	bope	Matching	S.Eng	S.Eng	Same	1	Correct
G13	139	82	bawp	barp	Mismatching	0.45	Dissimilar	Different	0	Correct
G13	141	305	durk	durk	Matching	0.99	Similar	Same	1	Correct
G13	142	213	bowp	bipe	Mismatching	1	Similar	Different	0	Correct
G13	143	141	dook	dook	Matching	0	Dissimilar	Same	1	Correct
G13	144	113	fuf	fif	Mismatching	0.11	Dissimilar	Different	0	Correct
G13	145	9	bawp	bowp	Mismatching	0.01	Dissimilar	Same	1	Incorrect
G13	146	338	deek	deek	Matching	S.Eng	S.Eng	Different	0	Incorrect
G13	147	29	faf	fuf	Mismatching	0.83	Similar	Same	1	Incorrect
G13	148	33	fif	fuf	Mismatching	0.89	Similar	Different	0	Correct
G13	149	262	deek	durk	Mismatching	0.2	Dissimilar	Different	0	Correct
G13	150	37	fof	fuff	Mismatching	0	Dissimilar	Different	0	Correct
G13	151	7	bawp	bipe	Mismatching	0.01	Dissimilar	Different	0	Correct
G13	152	304	durk	dook	Mismatching	0	Dissimilar	Different	0	Correct
G13	153	180	deek	deek	Matching	0.93	Similar	Same	1	Correct
G13	154	240	fuff	fuff	Matching	0	Dissimilar	Same	1	Correct
G13	155	198	fuf	fuf	Matching	0.59	Similar	Different	0	Incorrect
G13	156	303	durk	deek	Mismatching	0.44	Dissimilar	Different	0	Correct
G13	157	76	fof	fuf	Mismatching	0	Dissimilar	Different	0	Correct
G13	158	51	bipe	bope	Mismatching	0.85	Similar	Different	0	Correct
G13	159	371	bowp	barp	Mismatching	S.Eng	S.Eng	Different	0	Correct
G13	160	91	bowp	barp	Mismatching	0.9	Similar	Same	1	Incorrect
G13	162	162	barp	bawp	Mismatching	0.01	Dissimilar	Same	1	Incorrect
G13	163	288	bope	bawp	Mismatching	0.45	Dissimilar	Same	1	Incorrect
G13	164	396	fuff	faf	Mismatching	S.Eng	S.Eng	Different	0	Correct
G13	165	88	bope	bawp	Mismatching	0	Dissimilar	Same	1	Incorrect
G13	166	308	fif	fif	Matching	0.97	Similar	Same	1	Correct
G13	167	334	bowp	bope	Mismatching	S.Eng	S.Eng	Different	0	Correct
G13	168	138	deek	deek	Matching	0.44	Dissimilar	Same	1	Correct
G13	169	222	durk	dake	Mismatching	0.99	Similar	Different	0	Correct
G13	171	128	bope	bawp	Mismatching	0	Dissimilar	Same	1	Incorrect
G13	172	115	fuf	fuf	Matching	0.11	Dissimilar	Different	0	Incorrect
G13	173	218	deek	deek	Matching	0.44	Dissimilar	Same	1	Correct
G13	174	231	fof	fof	Matching	0.01	Dissimilar	Different	0	Incorrect
G13	175	214	bowp	bope	Mismatching	0	Dissimilar	Same	1	Incorrect
G13	176	53	bope	bope	Matching	0.02	Dissimilar	Same	1	Correct
G13	177	44	barp	bope	Mismatching	0.15	Dissimilar	Different	0	Correct
G13	178	170	bipe	bipe	Matching	0.85	Similar	Same	1	Correct
G13	179	367	bope	barp	Mismatching	S.Eng	S.Eng	Different	0	Correct
G13	180	263	dook	dook	Matching	0.03	Dissimilar	Same	1	Correct
G13	181	206	bipe	bipe	Matching	1	Similar	Same	1	Correct
G13	182	201	barp	barp	Matching	0.9	Similar	Different	0	Incorrect
G13	183	219	dook	dake	Mismatching	0.99	Similar	Different	0	Correct
G13	185	154	fuf	fof	Mismatching	0.11	Dissimilar	Same	1	Incorrect
G13	186	239	fuff	fuf	Mismatching	0.11	Dissimilar	Same	1	Incorrect
G13	187	156	fuff	faf	Mismatching	0	Dissimilar	Different	0	Correct
G13	188	238	fuff	fof	Mismatching	0.01	Dissimilar	Different	0	Correct
G13	189	365	bipe	bawp	Mismatching	S.Eng	S.Eng	Different	0	Correct
G13	190	137	deek	dake	Mismatching	0.44	Dissimilar	Different	0	Correct
G13	191	279	fuf	fuff	Mismatching	0	Dissimilar	Different	0	Correct
G13	192	172	bipe	bowp	Mismatching	0.94	Similar	Different	0	Correct
G13	193	10	bipe	bipe	Matching	0.85	Similar	Different	0	Incorrect
G13	194	221	dook	dook	Matching	0	Dissimilar	Same	1	Correct
G13	195	276	fof	fuf	Mismatching	0.59	Similar	Same	1	Incorrect
G13	196	166	bawp	bawp	Matching	0.01	Dissimilar	Same	1	Correct
G13	197	66	faf	faf	Matching	0.83	Similar	Same	1	Correct
G13	198	325	bipe	bawp	Mismatching	S.Eng	S.Eng	Different	0	Correct
G13	199	86	bipe	bipe	Matching	1	Similar	Same	1	Correct
G13	200	353	fuf	fif	Mismatching	S.Eng	S.Eng	Different	0	Correct
G13	201	285	bipe	bawp	Mismatching	0.45	Dissimilar	Different	0	Correct
G13	202	400	fuff	fuff	Matching	S.Eng	S.Eng	Same	1	Correct
G13	203	191	fif	fif	Matching	0.89	Similar	Same	1	Correct
G13	204	340	dook	deek	Mismatching	S.Eng	S.Eng	Different	0	Correct
G13	206	131	bowp	barp	Mismatching	0.9	Similar	Same	1	Incorrect
G13	207	161	barp	barp	Matching	0.15	Dissimilar	Same	1	Correct
G13	208	253	bope	bope	Matching	0.02	Dissimilar	Same	1	Correct
G13	209	306	faf	faf	Matching	1	Similar	Same	1	Correct
G13	210	197	fof	fuff	Mismatching	0	Dissimilar	Same	1	Incorrect
G13	211	274	fif	fuff	Mismatching	0	Dissimilar	Same	1	Incorrect
G13	212	210	bope	bope	Matching	0	Dissimilar	Same	1	Correct
G13	213	164	barp	bope	Mismatching	0.02	Dissimilar	Different	0	Correct
G13	214	59	dake	durk	Mismatching	1	Similar	Same	1	Incorrect
G13	215	125	bipe	bawp	Mismatching	1	Similar	Different	0	Correct
G13	216	347	fif	faf	Mismatching	S.Eng	S.Eng	Different	0	Correct
G13	217	399	fuff	fuf	Mismatching	S.Eng	S.Eng	Different	0	Correct
G13	218	249	bawp	bowp	Mismatching	0.94	Similar	Same	1	Incorrect
G13	219	97	deek	dake	Mismatching	0.44	Dissimilar	Different	0	Correct
G13	220	189	faf	fuf	Mismatching	0.59	Similar	Different	0	Correct
G13	221	267	faf	fif	Mismatching	0.89	Similar	Different	0	Correct
G13	222	123	bawp	bawp	Matching	0.45	Dissimilar	Same	1	Correct
G13	223	335	bowp	bowp	Matching	S.Eng	S.Eng	Same	1	Correct
G13	224	49	bawp	bowp	Mismatching	0.01	Dissimilar	Same	1	Incorrect
G13	225	68	faf	fof	Mismatching	0.83	Similar	Different	0	Correct
G13	226	94	bowp	bope	Mismatching	0.9	Similar	Same	1	Incorrect
G13	227	224	durk	dook	Mismatching	0	Dissimilar	Different	0	Correct
G13	228	99	dook	dake	Mismatching	0	Dissimilar	Different	0	Correct
G13	229	129	bope	bipe	Mismatching	0	Dissimilar	Different	0	Correct
G13	230	398	fuff	fof	Mismatching	S.Eng	S.Eng	Different	0	Correct
G13	231	346	faf	faf	Matching	S.Eng	S.Eng	Same	1	Correct
G13	232	35	fof	fof	Matching	0	Dissimilar	Same	1	Correct
G13	233	256	dake	dake	Matching	1	Similar	Same	1	Correct
G13	234	25	durk	durk	Matching	0.2	Dissimilar	Same	1	Correct
G13	235	56	dake	dake	Matching	1	Similar	Same	1	Correct
G13	236	337	deek	dake	Mismatching	S.Eng	S.Eng	Different	0	Correct
G13	237	333	bowp	bipe	Mismatching	S.Eng	S.Eng	Different	0	Correct
G13	238	266	faf	faf	Matching	0.83	Similar	Same	1	Correct
G13	239	357	fuff	fif	Mismatching	S.Eng	S.Eng	Same	1	Incorrect
G13	240	316	fuff	faf	Mismatching	1	Similar	Different	0	Correct
G13	241	6	bawp	bawp	Matching	0.01	Dissimilar	Same	1	Correct
G13	242	323	bawp	bawp	Matching	S.Eng	S.Eng	Same	1	Correct
G13	243	126	bipe	bipe	Matching	1	Similar	Same	1	Correct
G13	244	22	deek	durk	Mismatching	0.93	Similar	Different	0	Correct
G13	245	244	barp	bope	Mismatching	0.02	Dissimilar	Different	0	Correct
G13	247	312	fuf	faf	Mismatching	1	Similar	Same	1	Incorrect
G13	248	205	bipe	bawp	Mismatching	0.45	Dissimilar	Different	0	Correct
G13	249	241	barp	barp	Matching	0.15	Dissimilar	Same	1	Correct
G13	250	52	bipe	bowp	Mismatching	0.85	Similar	Different	0	Correct
G13	251	301	dook	dook	Matching	0	Dissimilar	Different	0	Incorrect
G13	252	290	bope	bope	Matching	0	Dissimilar	Different	0	Incorrect
G13	253	322	bawp	barp	Mismatching	S.Eng	S.Eng	Same	1	Incorrect
G13	254	364	bipe	barp	Mismatching	S.Eng	S.Eng	Different	0	Correct
G13	255	378	deek	deek	Matching	S.Eng	S.Eng	Same	1	Correct
G13	256	127	bope	barp	Mismatching	0	Dissimilar	Different	0	Correct
G13	257	21	deek	dook	Mismatching	0.93	Similar	Different	0	Correct
G13	258	117	fuff	fif	Mismatching	0	Dissimilar	Different	0	Correct
G13	259	73	fif	fuf	Mismatching	0.89	Similar	Different	0	Correct
G13	260	281	barp	barp	Matching	0.9	Similar	Same	1	Correct
G13	261	195	fof	fof	Matching	0	Dissimilar	Same	1	Correct
G13	262	225	durk	durk	Matching	0.99	Similar	Same	1	Correct
G13	263	315	fuf	fuf	Matching	0.11	Dissimilar	Same	1	Correct
G13	264	313	fuf	fif	Mismatching	0.97	Similar	Different	0	Correct
G13	265	112	fuf	faf	Mismatching	0.11	Dissimilar	Different	0	Correct
G13	266	67	faf	fif	Mismatching	0.83	Similar	Different	0	Correct
G13	267	2	barp	bawp	Mismatching	0.15	Dissimilar	Different	0	Correct
G13	268	143	durk	deek	Mismatching	0.99	Similar	Different	0	Correct
G13	269	92	bowp	bawp	Mismatching	0.9	Similar	Same	1	Incorrect
G13	270	188	faf	fof	Mismatching	0	Dissimilar	Same	1	Incorrect
G13	271	207	bope	barp	Mismatching	0.9	Similar	Same	1	Incorrect
G13	272	96	dake	dake	Matching	0.99	Similar	Same	1	Correct
G13	273	360	fuff	fuff	Matching	S.Eng	S.Eng	Same	1	Correct
G13	274	307	fif	faf	Mismatching	1	Similar	Different	0	Correct
G13	275	124	bipe	barp	Mismatching	1	Similar	Different	0	Correct
G13	276	160	fuff	fuff	Matching	0	Dissimilar	Different	0	Incorrect
G13	277	260	deek	deek	Matching	0.93	Similar	Same	1	Correct
G13	278	366	bipe	bipe	Matching	S.Eng	S.Eng	Same	1	Correct
G13	279	147	fif	faf	Mismatching	0.97	Similar	Different	0	Correct
G13	280	211	bowp	barp	Mismatching	0.9	Similar	Same	1	Incorrect
G13	281	372	bowp	bawp	Mismatching	S.Eng	S.Eng	Different	0	Correct
G13	282	133	bowp	bipe	Mismatching	0.9	Similar	Different	0	Correct
G13	283	295	bowp	bowp	Matching	0.9	Similar	Same	1	Correct
G13	284	390	fof	fif	Mismatching	S.Eng	S.Eng	Different	0	Correct
G13	285	71	fif	fif	Matching	0.89	Similar	Same	1	Correct
G13	286	157	fuff	fif	Mismatching	0	Dissimilar	Different	0	Correct
G13	287	177	dake	deek	Mismatching	0.93	Similar	Different	0	Correct
G13	288	60	deek	deek	Matching	0.93	Similar	Same	1	Correct
G13	290	34	fif	fuff	Mismatching	0.89	Similar	Same	1	Incorrect
G13	291	280	fuff	fuff	Matching	0	Dissimilar	Different	0	Incorrect
G13	292	380	dook	deek	Mismatching	S.Eng	S.Eng	Different	0	Correct
G13	293	358	fuff	fof	Mismatching	S.Eng	S.Eng	Same	1	Incorrect
G13	294	38	fuf	fuf	Matching	0.59	Similar	Same	1	Correct
G13	295	81	barp	barp	Matching	0.9	Similar	Same	1	Correct
G13	296	252	bipe	bowp	Mismatching	0.94	Similar	Different	0	Correct
G13	297	31	fif	fif	Matching	0.89	Similar	Same	1	Correct
G13	298	16	dake	dake	Matching	1	Similar	Same	1	Correct
G13	299	298	deek	deek	Matching	0.44	Dissimilar	Same	1	Correct
G13	300	3	barp	bipe	Mismatching	0.15	Dissimilar	Same	1	Incorrect
G13	301	327	bope	barp	Mismatching	S.Eng	S.Eng	Different	0	Correct
G13	302	149	fof	faf	Mismatching	0.01	Dissimilar	Same	1	Incorrect
G13	303	345	durk	durk	Matching	S.Eng	S.Eng	Same	1	Correct
G13	304	175	bowp	bowp	Matching	0.94	Similar	Same	1	Correct
G13	305	216	dake	dake	Matching	0.99	Similar	Same	1	Correct
G13	306	242	barp	bawp	Mismatching	0.01	Dissimilar	Different	0	Correct
G13	307	109	fof	faf	Mismatching	0.01	Dissimilar	Same	1	Incorrect
G13	308	394	fuf	fof	Mismatching	S.Eng	S.Eng	Different	0	Correct
G13	309	208	bope	bawp	Mismatching	0.45	Dissimilar	Different	0	Correct
G13	310	297	deek	dake	Mismatching	0.99	Similar	Different	0	Correct
G13	311	336	dake	dake	Matching	S.Eng	S.Eng	Same	1	Correct
G13	312	134	bowp	bope	Mismatching	0.9	Similar	Same	1	Incorrect
G13	313	150	fof	fif	Mismatching	0.01	Dissimilar	Different	0	Correct
G13	314	314	fuf	fof	Mismatching	0.01	Dissimilar	Same	1	Incorrect
G13	315	391	fof	fof	Matching	S.Eng	S.Eng	Different	0	Incorrect
G13	316	186	faf	faf	Matching	0.83	Similar	Same	1	Correct
G13	317	104	durk	dook	Mismatching	0.99	Similar	Different	0	Correct
G13	318	98	deek	deek	Matching	0.44	Dissimilar	Same	1	Correct
G13	319	84	bipe	barp	Mismatching	1	Similar	Different	0	Correct
G13	320	100	dook	deek	Mismatching	0	Dissimilar	Different	0	Correct
G13	321	183	dook	dook	Matching	0.03	Dissimilar	Same	1	Correct
G13	322	70	faf	fuff	Mismatching	0.83	Similar	Different	0	Correct
G13	323	232	fuf	faf	Mismatching	1	Similar	Same	1	Incorrect
G13	324	173	bope	bope	Matching	0.02	Dissimilar	Same	1	Correct
G13	325	235	fuf	fuf	Matching	0.11	Dissimilar	Same	1	Correct
G13	326	194	fif	fuff	Mismatching	0	Dissimilar	Different	0	Correct
G13	327	196	fof	fuf	Mismatching	0.59	Similar	Same	1	Incorrect
G13	328	4	barp	bope	Mismatching	0.15	Dissimilar	Different	0	Correct
G13	329	24	dook	durk	Mismatching	0.03	Dissimilar	Different	0	Correct
G13	330	269	faf	fuf	Mismatching	0.59	Similar	Different	0	Correct
G13	331	193	fif	fuf	Mismatching	0.59	Similar	Different	0	Correct
G13	332	388	fif	fif	Matching	S.Eng	S.Eng	Different	0	Incorrect
G13	333	185	durk	durk	Matching	0.2	Dissimilar	Different	0	Incorrect
G13	334	110	fof	fif	Mismatching	0.01	Dissimilar	Different	0	Correct
G13	335	286	bipe	bipe	Matching	1	Similar	Same	1	Correct
G13	336	144	durk	dook	Mismatching	0.99	Similar	Different	0	Correct
G13	337	30	faf	fuff	Mismatching	0.83	Similar	Different	0	Correct
G13	338	294	bowp	bope	Mismatching	0	Dissimilar	Different	0	Correct
G13	339	136	dake	dake	Matching	0.99	Similar	Same	1	Correct
G13	340	8	bawp	bope	Mismatching	0.01	Dissimilar	Different	0	Correct
G13	341	299	dook	dake	Mismatching	0.99	Similar	Different	0	Correct
G13	342	83	bawp	bawp	Matching	0.45	Dissimilar	Same	1	Correct
G13	343	163	barp	bipe	Mismatching	0.85	Similar	Different	0	Correct
G13	344	348	fif	fif	Matching	S.Eng	S.Eng	Same	1	Correct
G13	345	105	durk	durk	Matching	0.99	Similar	Same	1	Correct
G13	346	389	fof	faf	Mismatching	S.Eng	S.Eng	Different	0	Correct
G13	347	251	bipe	bope	Mismatching	0.02	Dissimilar	Different	0	Correct
G13	348	284	bipe	barp	Mismatching	0.9	Similar	Different	0	Correct
G13	349	85	bipe	bawp	Mismatching	1	Similar	Different	0	Correct
G13	351	332	bowp	bawp	Mismatching	S.Eng	S.Eng	Same	1	Incorrect
G13	352	275	fof	fof	Matching	0	Dissimilar	Same	1	Correct
G13	353	18	dake	dook	Mismatching	1	Similar	Different	0	Correct
G13	354	181	deek	dook	Mismatching	0.03	Dissimilar	Different	0	Correct
G13	355	23	dook	dook	Matching	0.03	Dissimilar	Same	1	Correct
G13	356	153	fuf	fif	Mismatching	0.11	Dissimilar	Different	0	Correct
G13	357	145	durk	durk	Matching	0.99	Similar	Same	1	Correct
G13	358	203	bawp	bawp	Matching	0.45	Dissimilar	Same	1	Correct
G13	359	122	bawp	barp	Mismatching	0.45	Dissimilar	Different	0	Correct
G13	360	101	dook	dook	Matching	0	Dissimilar	Same	1	Correct
G13	361	108	fif	fif	Matching	0.97	Similar	Same	1	Correct
G13	362	246	bawp	bawp	Matching	0.01	Dissimilar	Same	1	Correct
G13	363	248	bawp	bope	Mismatching	0.02	Dissimilar	Different	0	Correct
G13	364	385	durk	durk	Matching	S.Eng	S.Eng	Same	1	Correct
G13	365	331	bowp	barp	Mismatching	S.Eng	S.Eng	Different	0	Correct
G13	367	383	durk	deek	Mismatching	S.Eng	S.Eng	Different	0	Correct
G13	368	15	bowp	bowp	Matching	0.94	Similar	Same	1	Correct
G13	369	158	fuff	fof	Mismatching	0	Dissimilar	Same	1	Incorrect
G13	370	165	barp	bowp	Mismatching	0.94	Similar	Different	0	Correct
G13	371	93	bowp	bipe	Mismatching	0.9	Similar	Different	0	Correct
G13	372	171	bipe	bope	Mismatching	0.02	Dissimilar	Same	1	Incorrect
G13	373	1	barp	barp	Matching	0.15	Dissimilar	Same	1	Correct
G13	374	95	bowp	bowp	Matching	0.9	Similar	Same	1	Correct
G13	375	119	fuff	fuf	Mismatching	0	Dissimilar	Same	1	Incorrect
G13	376	19	dake	durk	Mismatching	1	Similar	Different	0	Correct
G13	377	270	faf	fuff	Mismatching	0	Dissimilar	Same	1	Incorrect
G13	378	265	durk	durk	Matching	0.2	Dissimilar	Different	0	Incorrect
G13	379	48	bawp	bope	Mismatching	0.01	Dissimilar	Different	0	Correct
G13	380	381	dook	dook	Matching	S.Eng	S.Eng	Same	1	Correct
G13	381	234	fuf	fof	Mismatching	0.01	Dissimilar	Different	0	Correct
G13	382	75	fof	fof	Matching	0	Dissimilar	Same	1	Correct
G13	383	300	dook	deek	Mismatching	0.44	Dissimilar	Different	0	Correct
G13	385	63	dook	dook	Matching	0.03	Dissimilar	Different	0	Incorrect
G13	386	228	fif	fif	Matching	0.97	Similar	Different	0	Incorrect
G13	387	80	fuff	fuff	Matching	0	Dissimilar	Different	0	Incorrect
G13	389	324	bipe	barp	Mismatching	S.Eng	S.Eng	Different	0	Correct
G13	390	140	dook	deek	Mismatching	0	Dissimilar	Different	0	Correct
G13	391	26	faf	faf	Matching	0.83	Similar	Same	1	Correct
G13	392	178	dake	dook	Mismatching	0.03	Dissimilar	Different	0	Correct
G13	393	321	barp	barp	Matching	S.Eng	S.Eng	Same	1	Correct
G13	394	395	fuf	fuf	Matching	S.Eng	S.Eng	Same	1	Correct
G13	395	233	fuf	fif	Mismatching	0.97	Similar	Different	0	Correct
G13	396	354	fuf	fof	Mismatching	S.Eng	S.Eng	Different	0	Correct
G13	397	148	fif	fif	Matching	0.97	Similar	Same	1	Correct
G13	399	376	dake	dake	Matching	S.Eng	S.Eng	Same	1	Correct
G13	400	215	bowp	bowp	Matching	0.9	Similar	Same	1	Correct
G14	1	87	bope	barp	Mismatching	0	Dissimilar	Different	0	Correct
G14	2	88	bope	bawp	Mismatching	0	Dissimilar	Different	0	Correct
G14	3	175	bowp	bowp	Matching	0.94	Similar	Same	1	Correct
G14	4	279	fuf	fuff	Mismatching	0	Dissimilar	Same	1	Incorrect
G14	5	398	fuff	fof	Mismatching	S.Eng	S.Eng	Different	0	Correct
G14	6	158	fuff	fof	Mismatching	0	Dissimilar	Same	1	Incorrect
G14	7	7	bawp	bipe	Mismatching	0.01	Dissimilar	Different	0	Correct
G14	8	248	bawp	bope	Mismatching	0.02	Dissimilar	Same	1	Incorrect
G14	9	64	dook	durk	Mismatching	0.03	Dissimilar	Same	1	Incorrect
G14	11	188	faf	fof	Mismatching	0	Dissimilar	Same	1	Incorrect
G14	12	228	fif	fif	Matching	0.97	Similar	Same	1	Correct
G14	13	36	fof	fuf	Mismatching	0	Dissimilar	Same	1	Incorrect
G14	14	86	bipe	bipe	Matching	1	Similar	Same	1	Correct
G14	15	194	fif	fuff	Mismatching	0	Dissimilar	Different	0	Correct
G14	16	256	dake	dake	Matching	1	Similar	Same	1	Correct
G14	17	309	fof	faf	Mismatching	1	Similar	Same	1	Incorrect
G14	18	4	barp	bope	Mismatching	0.15	Dissimilar	Different	0	Correct
G14	19	203	bawp	bawp	Matching	0.45	Dissimilar	Same	1	Correct
G14	20	370	bope	bope	Matching	S.Eng	S.Eng	Different	0	Incorrect
G14	21	393	fuf	fif	Mismatching	S.Eng	S.Eng	Different	0	Correct
G14	22	316	fuff	faf	Mismatching	1	Similar	Different	0	Correct
G14	23	155	fuf	fuf	Matching	0.11	Dissimilar	Different	0	Incorrect
G14	24	54	bope	bowp	Mismatching	0.02	Dissimilar	Different	0	Correct
[truncated: 6,760 more rows]
