# Supplementary material for: Acoustic Similarity Predicts Vowel Phoneme Detection in an Unfamiliar Regional Accent: Evidence from Monolinguals, Bilinguals and Second-Language Learners
Source: MDPI journal article supplement (doi:10.3390/languages9020062), 2024-02-14
Supplement: s1 [file s1 › 7. Experiment 2 Trial Data.csv]

Participant	Group	Trial	Item	Syllable1	Syllable2	ItemType	AcousticSimilarity	Similarity	Response	Sameness	Accuracy
M1	Monolingual	1	140	bope	bipe	Mismatching	0.64	Similar	Different	0	Correct
M1	Monolingual	2	199	durk	deek	Mismatching	0.95	Similar	Same	1	Incorrect
M1	Monolingual	3	169	fuff	fif	Mismatching	0.95	Similar	Different	0	Correct
M1	Monolingual	4	147	fif	fof	Mismatching	0	Dissimilar	Different	0	Correct
M1	Monolingual	5	256	bipe	barp	Mismatching	0.63	Similar	Different	0	Correct
M1	Monolingual	6	88	fuff	fuff	Matching	0.95	Similar	Same	1	Correct
M1	Monolingual	7	107	fuf	fuf	Matching	0.01	Dissimilar	Different	0	Incorrect
M1	Monolingual	8	121	faf	fuff	Mismatching	0.95	Similar	Same	1	Incorrect
M1	Monolingual	9	313	fuf	fif	Mismatching	1	Similar	Different	0	Correct
M1	Monolingual	10	69	bawp	bawp	Matching	0.92	Similar	Same	1	Correct
M1	Monolingual	11	103	dook	dook	Matching	0.01	Dissimilar	Same	1	Correct
M1	Monolingual	12	211	fuff	faf	Mismatching	0.9	Similar	Same	1	Incorrect
M1	Monolingual	13	128	fuff	fuf	Mismatching	0	Dissimilar	Same	1	Incorrect
M1	Monolingual	14	4	dook	dook	Matching	0.01	Dissimilar	Same	1	Correct
M1	Monolingual	15	162	bawp	bipe	Mismatching	1	Similar	Different	0	Correct
M1	Monolingual	16	146	barp	bope	Mismatching	0.63	Similar	Same	1	Incorrect
M1	Monolingual	17	257	fuff	fof	Mismatching	0.95	Similar	Same	1	Incorrect
M1	Monolingual	18	243	fuf	faf	Mismatching	0	Dissimilar	Different	0	Correct
M1	Monolingual	19	187	fif	fuf	Mismatching	0.99	Similar	Same	1	Incorrect
M1	Monolingual	20	125	bope	bawp	Mismatching	0.92	Similar	Different	0	Correct
M1	Monolingual	21	80	faf	faf	Matching	0.85	Similar	Same	1	Correct
M1	Monolingual	22	258	bawp	bope	Mismatching	1	Similar	Different	0	Correct
M1	Monolingual	23	48	bipe	bipe	Matching	0.99	Similar	Same	1	Correct
M1	Monolingual	24	268	faf	fuf	Mismatching	0.47	Dissimilar	Same	1	Incorrect
M1	Monolingual	25	45	bawp	bawp	Matching	0.92	Similar	Same	1	Correct
M1	Monolingual	26	212	dook	durk	Mismatching	0.95	Similar	Same	1	Incorrect
M1	Monolingual	27	6	fif	fif	Matching	1	Similar	Same	1	Correct
M1	Monolingual	28	29	dook	dook	Matching	0.02	Dissimilar	Different	0	Incorrect
M1	Monolingual	29	126	dake	dook	Mismatching	0.02	Dissimilar	Different	0	Correct
M1	Monolingual	30	283	barp	bawp	Mismatching	0.63	Similar	Different	0	Correct
M1	Monolingual	31	307	fif	faf	Mismatching	0.47	Dissimilar	Different	0	Correct
M1	Monolingual	32	179	faf	fof	Mismatching	0	Dissimilar	Different	0	Correct
M1	Monolingual	33	242	faf	fuf	Mismatching	0.01	Dissimilar	Different	0	Correct
M1	Monolingual	34	61	durk	durk	Matching	0.97	Similar	Same	1	Correct
M1	Monolingual	35	304	fuff	fuf	Mismatching	0.9	Similar	Different	0	Correct
M1	Monolingual	36	267	deek	dook	Mismatching	0.01	Dissimilar	Different	0	Correct
M1	Monolingual	37	185	fif	fuff	Mismatching	1	Similar	Same	1	Incorrect
M1	Monolingual	38	225	dake	deek	Mismatching	1	Similar	Same	1	Incorrect
M1	Monolingual	39	266	fof	fuf	Mismatching	0.01	Dissimilar	Same	1	Incorrect
M1	Monolingual	40	141	faf	fif	Mismatching	0.85	Similar	Same	1	Incorrect
M1	Monolingual	41	19	dake	dake	Matching	0.25	Dissimilar	Same	1	Correct
M1	Monolingual	42	178	bowp	bipe	Mismatching	1	Similar	Different	0	Correct
M1	Monolingual	43	277	bope	bowp	Mismatching	0.11	Dissimilar	Different	0	Correct
M1	Monolingual	44	135	faf	fof	Mismatching	0.01	Dissimilar	Different	0	Correct
M1	Monolingual	45	87	fof	fof	Matching	0	Dissimilar	Same	1	Correct
M1	Monolingual	46	47	faf	faf	Matching	0.85	Similar	Same	1	Correct
M1	Monolingual	47	228	deek	dook	Mismatching	1	Similar	Same	1	Incorrect
M1	Monolingual	48	291	dake	deek	Mismatching	1	Similar	Same	1	Incorrect
M1	Monolingual	49	65	dook	dook	Matching	0.01	Dissimilar	Same	1	Correct
M1	Monolingual	50	7	bawp	bawp	Matching	1	Similar	Same	1	Correct
M1	Monolingual	51	131	bope	barp	Mismatching	0.01	Dissimilar	Different	0	Correct
M1	Monolingual	52	293	fof	fif	Mismatching	0.99	Similar	Different	0	Correct
M1	Monolingual	53	180	fif	faf	Mismatching	0.99	Similar	Same	1	Incorrect
M1	Monolingual	54	85	bowp	bowp	Matching	0.21	Dissimilar	Same	1	Correct
M1	Monolingual	55	120	bope	bowp	Mismatching	0.11	Dissimilar	Different	0	Correct
M1	Monolingual	56	53	durk	durk	Matching	0.95	Similar	Same	1	Correct
M1	Monolingual	57	155	bawp	bowp	Mismatching	0.11	Dissimilar	Different	0	Correct
M1	Monolingual	58	239	dook	deek	Mismatching	1	Similar	Different	0	Correct
M1	Monolingual	59	70	bawp	bawp	Matching	0.92	Similar	Same	1	Correct
M1	Monolingual	60	260	dook	durk	Mismatching	0.01	Dissimilar	Different	0	Correct
M1	Monolingual	61	274	barp	bawp	Mismatching	0.92	Similar	Different	0	Correct
M1	Monolingual	62	220	bowp	bope	Mismatching	0.01	Dissimilar	Same	1	Incorrect
M1	Monolingual	63	109	fif	fif	Matching	0.99	Similar	Same	1	Correct
M1	Monolingual	64	66	fif	fif	Matching	1	Similar	Same	1	Correct
M1	Monolingual	65	284	bowp	bipe	Mismatching	0.99	Similar	Same	1	Incorrect
M1	Monolingual	66	139	fif	fuff	Mismatching	0.95	Similar	Same	1	Incorrect
M1	Monolingual	67	108	durk	durk	Matching	0.95	Similar	Same	1	Correct
M1	Monolingual	68	209	dook	dake	Mismatching	0.25	Dissimilar	Same	1	Incorrect
M1	Monolingual	69	17	bope	bope	Matching	0.01	Dissimilar	Same	1	Correct
M1	Monolingual	70	73	dake	dake	Matching	0.88	Similar	Same	1	Correct
M1	Monolingual	71	182	bipe	barp	Mismatching	0.63	Similar	Different	0	Correct
M1	Monolingual	72	173	bipe	bowp	Mismatching	0.21	Dissimilar	Different	0	Correct
M1	Monolingual	73	275	bipe	barp	Mismatching	0.99	Similar	Different	0	Correct
M1	Monolingual	74	245	dake	durk	Mismatching	0.25	Dissimilar	Different	0	Correct
M1	Monolingual	75	177	dake	deek	Mismatching	0.88	Similar	Same	1	Incorrect
M1	Monolingual	76	81	durk	durk	Matching	0.97	Similar	Same	1	Correct
M1	Monolingual	77	310	faf	fuff	Mismatching	0.85	Similar	Different	0	Correct
M1	Monolingual	78	154	bope	bowp	Mismatching	0.64	Similar	Same	1	Incorrect
M1	Monolingual	79	197	fuf	fof	Mismatching	0.01	Dissimilar	Same	1	Incorrect
M1	Monolingual	80	127	dook	deek	Mismatching	0.02	Dissimilar	Same	1	Incorrect
M1	Monolingual	81	54	bope	bope	Matching	0.64	Similar	Same	1	Correct
M1	Monolingual	82	181	bawp	bipe	Mismatching	1	Similar	Different	0	Correct
M1	Monolingual	83	22	bipe	bipe	Matching	0.99	Similar	Same	1	Correct
M1	Monolingual	84	259	bope	bipe	Mismatching	0.99	Similar	Different	0	Correct
M1	Monolingual	85	89	bawp	bawp	Matching	1	Similar	Same	1	Correct
M1	Monolingual	86	226	barp	bowp	Mismatching	1	Similar	Different	0	Correct
M1	Monolingual	87	74	fif	fif	Matching	0.99	Similar	Same	1	Correct
M1	Monolingual	88	299	dake	durk	Mismatching	0.97	Similar	Same	1	Incorrect
M1	Monolingual	89	104	durk	durk	Matching	0.95	Similar	Same	1	Correct
M1	Monolingual	90	117	deek	dake	Mismatching	1	Similar	Same	1	Incorrect
M1	Monolingual	91	168	bipe	bope	Mismatching	0.64	Similar	Different	0	Correct
M1	Monolingual	92	33	dake	dake	Matching	0.25	Dissimilar	Same	1	Correct
M1	Monolingual	93	39	deek	deek	Matching	1	Similar	Same	1	Correct
M1	Monolingual	94	273	bawp	bope	Mismatching	0.01	Dissimilar	Same	1	Incorrect
M1	Monolingual	95	51	deek	deek	Matching	1	Similar	Same	1	Correct
M1	Monolingual	96	28	bipe	bipe	Matching	0.99	Similar	Same	1	Correct
M1	Monolingual	97	161	bope	barp	Mismatching	1	Similar	Same	1	Incorrect
M1	Monolingual	98	295	deek	dake	Mismatching	0.88	Similar	Different	0	Correct
M1	Monolingual	99	191	bawp	barp	Mismatching	1	Similar	Different	0	Correct
M1	Monolingual	100	206	fuf	fuff	Mismatching	0.01	Dissimilar	Different	0	Correct
M1	Monolingual	101	31	dake	dake	Matching	0.88	Similar	Same	1	Correct
M1	Monolingual	102	282	deek	dook	Mismatching	1	Similar	Different	0	Correct
M1	Monolingual	103	280	bipe	barp	Mismatching	0.99	Similar	Different	0	Correct
M1	Monolingual	104	262	fif	faf	Mismatching	0.47	Dissimilar	Different	0	Correct
M1	Monolingual	105	111	bope	bope	Matching	0.01	Dissimilar	Same	1	Correct
M1	Monolingual	106	265	bowp	bawp	Mismatching	0.11	Dissimilar	Different	0	Correct
M1	Monolingual	107	150	dake	durk	Mismatching	0.88	Similar	Different	0	Correct
M1	Monolingual	108	320	fof	fuff	Mismatching	0.9	Similar	Different	0	Correct
M1	Monolingual	109	72	deek	deek	Matching	1	Similar	Same	1	Correct
M1	Monolingual	110	79	bope	bope	Matching	0.64	Similar	Same	1	Correct
M1	Monolingual	111	302	barp	bipe	Mismatching	0.63	Similar	Different	0	Correct
M1	Monolingual	112	271	fof	faf	Mismatching	0.85	Similar	Different	0	Correct
M1	Monolingual	113	316	bowp	bope	Mismatching	0.21	Dissimilar	Different	0	Correct
M1	Monolingual	114	10	fuff	fuff	Matching	0.9	Similar	Same	1	Correct
M1	Monolingual	115	219	barp	bawp	Mismatching	0.63	Similar	Different	0	Correct
M1	Monolingual	116	52	bowp	bowp	Matching	0.21	Dissimilar	Same	1	Correct
M1	Monolingual	117	261	dake	dook	Mismatching	0.88	Similar	Different	0	Correct
M1	Monolingual	118	201	bowp	barp	Mismatching	1	Similar	Different	0	Correct
M1	Monolingual	119	71	fuff	fuff	Matching	0.95	Similar	Same	1	Correct
M1	Monolingual	120	114	durk	dake	Mismatching	0.97	Similar	Same	1	Incorrect
M1	Monolingual	121	37	fuf	fuf	Matching	0.01	Dissimilar	Same	1	Correct
M1	Monolingual	122	244	faf	fif	Mismatching	1	Similar	Same	1	Incorrect
M1	Monolingual	123	235	bawp	barp	Mismatching	1	Similar	Same	1	Incorrect
M1	Monolingual	124	188	fuff	fif	Mismatching	0.9	Similar	Same	1	Incorrect
M1	Monolingual	125	251	barp	bope	Mismatching	0.64	Similar	Different	0	Correct
M1	Monolingual	126	8	faf	faf	Matching	0.47	Dissimilar	Same	1	Correct
M1	Monolingual	127	98	fof	fof	Matching	0.01	Dissimilar	Same	1	Correct
M1	Monolingual	128	285	fof	fuf	Mismatching	0.01	Dissimilar	Same	1	Incorrect
M1	Monolingual	129	50	deek	deek	Matching	1	Similar	Same	1	Correct
M1	Monolingual	130	240	fif	fuff	Mismatching	1	Similar	Different	0	Correct
M1	Monolingual	131	134	dook	durk	Mismatching	0.95	Similar	Different	0	Correct
M1	Monolingual	132	77	bawp	bawp	Matching	1	Similar	Same	1	Correct
M1	Monolingual	133	123	fuf	fif	Mismatching	0.01	Dissimilar	Different	0	Correct
M1	Monolingual	134	264	dook	deek	Mismatching	1	Similar	Different	0	Correct
M1	Monolingual	135	130	fuff	fuf	Mismatching	0	Dissimilar	Same	1	Incorrect
M1	Monolingual	136	253	fuf	fof	Mismatching	0.01	Dissimilar	Same	1	Incorrect
M1	Monolingual	137	157	fof	fif	Mismatching	0.99	Similar	Different	0	Correct
M1	Monolingual	138	96	fuf	fuf	Matching	0	Dissimilar	Different	0	Incorrect
M1	Monolingual	139	59	fuf	fuf	Matching	0	Dissimilar	Different	0	Incorrect
M1	Monolingual	140	93	bawp	bawp	Matching	1	Similar	Different	0	Incorrect
M1	Monolingual	141	86	bowp	bowp	Matching	0.21	Dissimilar	Same	1	Correct
M1	Monolingual	142	21	fof	fof	Matching	0	Dissimilar	Same	1	Correct
M1	Monolingual	143	143	fuff	faf	Mismatching	0.95	Similar	Different	0	Correct
M1	Monolingual	144	84	dake	dake	Matching	0.25	Dissimilar	Same	1	Correct
M1	Monolingual	145	246	fuff	faf	Mismatching	0.85	Similar	Different	0	Correct
M1	Monolingual	146	115	fuff	fof	Mismatching	0.01	Dissimilar	Different	0	Correct
M1	Monolingual	147	238	bipe	bawp	Mismatching	1	Similar	Different	0	Correct
M1	Monolingual	148	298	bawp	bope	Mismatching	1	Similar	Different	0	Correct
M1	Monolingual	149	100	bipe	bipe	Matching	1	Similar	Same	1	Correct
M1	Monolingual	150	166	bope	bipe	Mismatching	0.99	Similar	Different	0	Correct
M1	Monolingual	151	56	fof	fof	Matching	0	Dissimilar	Same	1	Correct
M1	Monolingual	152	223	fof	faf	Mismatching	0.01	Dissimilar	Different	0	Correct
M1	Monolingual	153	247	durk	deek	Mismatching	0.95	Similar	Different	0	Correct
M1	Monolingual	154	175	durk	dake	Mismatching	0.88	Similar	Different	0	Correct
M1	Monolingual	155	55	fuff	fuff	Matching	0.9	Similar	Same	1	Correct
M1	Monolingual	156	172	fuf	fif	Mismatching	1	Similar	Different	0	Correct
M1	Monolingual	157	305	bipe	bowp	Mismatching	0.21	Dissimilar	Different	0	Correct
M1	Monolingual	158	216	barp	bipe	Mismatching	0.99	Similar	Different	0	Correct
M1	Monolingual	159	214	deek	dook	Mismatching	0.01	Dissimilar	Different	0	Correct
M1	Monolingual	160	18	barp	barp	Matching	0.63	Similar	Same	1	Correct
M1	Monolingual	161	11	barp	barp	Matching	1	Similar	Same	1	Correct
M1	Monolingual	162	36	fuf	fuf	Matching	0.01	Dissimilar	Different	0	Incorrect
M1	Monolingual	163	156	bope	barp	Mismatching	1	Similar	Different	0	Correct
M1	Monolingual	164	153	bawp	barp	Mismatching	1	Similar	Different	0	Correct
M1	Monolingual	165	32	bowp	bowp	Matching	0.11	Dissimilar	Same	1	Correct
M1	Monolingual	166	186	bawp	barp	Mismatching	1	Similar	Different	0	Correct
M1	Monolingual	167	300	barp	bope	Mismatching	1	Similar	Different	0	Correct
M1	Monolingual	168	315	bipe	bope	Mismatching	0.99	Similar	Different	0	Correct
M1	Monolingual	169	105	dook	dook	Matching	0.02	Dissimilar	Same	1	Correct
M1	Monolingual	170	133	bipe	bawp	Mismatching	1	Similar	Different	0	Correct
M1	Monolingual	171	12	fif	fif	Matching	0.99	Similar	Same	1	Correct
M1	Monolingual	172	193	dake	dook	Mismatching	0.02	Dissimilar	Different	0	Correct
M1	Monolingual	173	16	fof	fof	Matching	0.01	Dissimilar	Same	1	Correct
M1	Monolingual	174	248	bowp	bope	Mismatching	0.01	Dissimilar	Different	0	Correct
M1	Monolingual	175	158	fof	faf	Mismatching	0.85	Similar	Different	0	Correct
M1	Monolingual	176	101	bowp	bowp	Matching	0.11	Dissimilar	Same	1	Correct
M1	Monolingual	177	276	deek	dake	Mismatching	1	Similar	Different	0	Correct
M1	Monolingual	178	194	barp	bipe	Mismatching	1	Similar	Same	1	Incorrect
M1	Monolingual	179	41	faf	faf	Matching	0.85	Similar	Same	1	Correct
M1	Monolingual	180	25	bipe	bipe	Matching	1	Similar	Same	1	Correct
M1	Monolingual	181	231	fuf	fif	Mismatching	0.01	Dissimilar	Different	0	Correct
M1	Monolingual	182	95	faf	faf	Matching	0.47	Dissimilar	Different	0	Incorrect
M1	Monolingual	183	160	bawp	bowp	Mismatching	0.92	Similar	Different	0	Correct
M1	Monolingual	184	279	fif	fof	Mismatching	0.99	Similar	Different	0	Correct
M1	Monolingual	185	294	bowp	barp	Mismatching	0.63	Similar	Different	0	Correct
M1	Monolingual	186	151	dook	dake	Mismatching	0.25	Dissimilar	Different	0	Correct
M1	Monolingual	187	204	bawp	bipe	Mismatching	1	Similar	Different	0	Correct
M1	Monolingual	188	232	fuff	fif	Mismatching	0.99	Similar	Different	0	Correct
M1	Monolingual	189	34	fuf	fuf	Matching	0	Dissimilar	Same	1	Correct
M1	Monolingual	190	198	deek	durk	Mismatching	0.97	Similar	Different	0	Correct
M1	Monolingual	191	190	durk	dake	Mismatching	0.25	Dissimilar	Same	1	Incorrect
M1	Monolingual	192	213	deek	durk	Mismatching	0.97	Similar	Different	0	Correct
M1	Monolingual	193	94	bowp	bowp	Matching	0.11	Dissimilar	Same	1	Correct
M1	Monolingual	194	118	durk	dook	Mismatching	0.02	Dissimilar	Different	0	Correct
M1	Monolingual	195	129	barp	bipe	Mismatching	1	Similar	Different	0	Correct
M1	Monolingual	196	306	fif	faf	Mismatching	0.99	Similar	Different	0	Correct
M1	Monolingual	197	159	fif	fuf	Mismatching	0.99	Similar	Different	0	Correct
M1	Monolingual	198	210	bope	bawp	Mismatching	0.64	Similar	Different	0	Correct
M1	Monolingual	199	137	fif	fuf	Mismatching	0	Dissimilar	Different	0	Correct
M1	Monolingual	200	49	barp	barp	Matching	1	Similar	Same	1	Correct
M1	Monolingual	201	145	faf	fif	Mismatching	1	Similar	Different	0	Correct
M1	Monolingual	202	63	fof	fof	Matching	0.01	Dissimilar	Same	1	Correct
M1	Monolingual	203	122	faf	fuff	Mismatching	0.47	Dissimilar	Different	0	Correct
M1	Monolingual	204	233	fuf	fuff	Mismatching	0.01	Dissimilar	Same	1	Incorrect
M1	Monolingual	205	234	dook	dake	Mismatching	0.01	Dissimilar	Different	0	Correct
M1	Monolingual	206	224	bowp	bawp	Mismatching	0.21	Dissimilar	Different	0	Correct
M1	Monolingual	207	218	fof	fif	Mismatching	0	Dissimilar	Different	0	Correct
M1	Monolingual	208	203	bowp	bope	Mismatching	0.21	Dissimilar	Different	0	Correct
M1	Monolingual	209	241	dake	durk	Mismatching	0.95	Similar	Different	0	Correct
M1	Monolingual	210	249	bawp	bowp	Mismatching	0.92	Similar	Same	1	Incorrect
M1	Monolingual	211	222	deek	dake	Mismatching	0.88	Similar	Same	1	Incorrect
M1	Monolingual	212	82	bipe	bipe	Matching	1	Similar	Same	1	Correct
M1	Monolingual	213	76	barp	barp	Matching	1	Similar	Same	1	Correct
M1	Monolingual	214	311	fuff	fuf	Mismatching	0.9	Similar	Different	0	Correct
M1	Monolingual	215	35	fuff	fuff	Matching	0.95	Similar	Same	1	Correct
M1	Monolingual	216	217	deek	durk	Mismatching	1	Similar	Different	0	Correct
M1	Monolingual	217	221	fuf	fof	Mismatching	0.01	Dissimilar	Same	1	Incorrect
M1	Monolingual	218	208	faf	fuf	Mismatching	0.85	Similar	Different	0	Correct
M1	Monolingual	219	46	bope	bope	Matching	0.64	Similar	Same	1	Correct
M1	Monolingual	220	255	fuf	faf	Mismatching	0	Dissimilar	Different	0	Correct
M1	Monolingual	221	301	bope	bawp	Mismatching	0.92	Similar	Different	0	Correct
M1	Monolingual	222	144	fif	fuf	Mismatching	0	Dissimilar	Different	0	Correct
M1	Monolingual	223	44	deek	deek	Matching	1	Similar	Same	1	Correct
M1	Monolingual	224	288	fof	fuff	Mismatching	0.9	Similar	Different	0	Correct
M1	Monolingual	225	20	dook	dook	Matching	0.02	Dissimilar	Same	1	Correct
M1	Monolingual	226	170	dook	durk	Mismatching	0.01	Dissimilar	Different	0	Correct
M1	Monolingual	227	272	durk	deek	Mismatching	1	Similar	Different	0	Correct
M1	Monolingual	228	303	durk	deek	Mismatching	1	Similar	Different	0	Correct
M1	Monolingual	229	78	bowp	bowp	Matching	0.11	Dissimilar	Same	1	Correct
M1	Monolingual	230	152	dake	dook	Mismatching	0.88	Similar	Different	0	Correct
M1	Monolingual	231	164	dake	deek	Mismatching	0.25	Dissimilar	Same	1	Incorrect
M1	Monolingual	232	149	bipe	bope	Mismatching	0.99	Similar	Different	0	Correct
M1	Monolingual	233	67	fuff	fuff	Matching	0.95	Similar	Different	0	Incorrect
M1	Monolingual	234	176	faf	fuff	Mismatching	0.9	Similar	Different	0	Correct
M1	Monolingual	235	113	bawp	bope	Mismatching	0.01	Dissimilar	Different	0	Correct
M1	Monolingual	236	91	fif	fif	Matching	1	Similar	Same	1	Correct
M1	Monolingual	237	1	deek	deek	Matching	1	Similar	Same	1	Correct
M1	Monolingual	238	229	barp	bowp	Mismatching	0.11	Dissimilar	Different	0	Correct
M1	Monolingual	239	312	fuf	fuff	Mismatching	0.95	Similar	Same	1	Incorrect
M1	Monolingual	240	83	fif	fif	Matching	0.99	Similar	Same	1	Correct
M1	Monolingual	241	287	bope	bipe	Mismatching	0.64	Similar	Different	0	Correct
M1	Monolingual	242	252	dook	dake	Mismatching	0.01	Dissimilar	Same	1	Incorrect
M1	Monolingual	243	319	bipe	bowp	Mismatching	1	Similar	Different	0	Correct
M1	Monolingual	244	269	bawp	bowp	Mismatching	0.11	Dissimilar	Same	1	Incorrect
M1	Monolingual	245	263	fif	fof	Mismatching	0	Dissimilar	Different	0	Correct
M1	Monolingual	246	112	fuff	fuff	Matching	0.9	Similar	Different	0	Incorrect
M1	Monolingual	247	26	faf	faf	Matching	0.47	Dissimilar	Same	1	Correct
M1	Monolingual	248	309	bipe	bawp	Mismatching	1	Similar	Different	0	Correct
M1	Monolingual	249	5	fof	fof	Matching	0.01	Dissimilar	Same	1	Correct
M1	Monolingual	250	292	dook	deek	Mismatching	0.02	Dissimilar	Different	0	Correct
M1	Monolingual	251	68	durk	durk	Matching	0.95	Similar	Same	1	Correct
M1	Monolingual	252	42	bope	bope	Matching	0.64	Similar	Same	1	Correct
M1	Monolingual	253	308	bope	bowp	Mismatching	0.64	Similar	Different	0	Correct
M1	Monolingual	254	227	fif	fuff	Mismatching	0.95	Similar	Same	1	Incorrect
M1	Monolingual	255	192	bowp	bipe	Mismatching	0.11	Dissimilar	Different	0	Correct
M1	Monolingual	256	64	fuf	fuf	Matching	0.01	Dissimilar	Different	0	Incorrect
M1	Monolingual	257	163	fuff	faf	Mismatching	0.47	Dissimilar	Different	0	Correct
M1	Monolingual	258	57	bope	bope	Matching	0.01	Dissimilar	Same	1	Correct
M1	Monolingual	259	23	durk	durk	Matching	0.97	Similar	Same	1	Correct
M1	Monolingual	260	200	faf	fuf	Mismatching	0	Dissimilar	Different	0	Correct
M1	Monolingual	261	15	bowp	bowp	Matching	0.21	Dissimilar	Same	1	Correct
M1	Monolingual	262	14	bipe	bipe	Matching	0.99	Similar	Same	1	Correct
M1	Monolingual	263	196	bipe	bowp	Mismatching	1	Similar	Different	0	Correct
M1	Monolingual	264	289	bowp	bawp	Mismatching	1	Similar	Different	0	Correct
M1	Monolingual	265	290	fuff	fif	Mismatching	1	Similar	Different	0	Correct
M1	Monolingual	266	13	barp	barp	Matching	0.63	Similar	Same	1	Correct
M1	Monolingual	267	254	bope	bawp	Mismatching	0.64	Similar	Different	0	Correct
M1	Monolingual	268	278	faf	fof	Mismatching	0.47	Dissimilar	Different	0	Correct
M1	Monolingual	269	297	faf	fif	Mismatching	0.85	Similar	Different	0	Correct
M1	Monolingual	270	38	dook	dook	Matching	0.01	Dissimilar	Different	0	Incorrect
M1	Monolingual	271	110	barp	barp	Matching	1	Similar	Same	1	Correct
M1	Monolingual	272	27	durk	durk	Matching	0.97	Similar	Same	1	Correct
M1	Monolingual	273	174	bipe	bawp	Mismatching	1	Similar	Different	0	Correct
M1	Monolingual	274	202	fuf	fuff	Mismatching	0.95	Similar	Different	0	Correct
M1	Monolingual	275	136	durk	dake	Mismatching	0.95	Similar	Different	0	Correct
M1	Monolingual	276	207	bawp	bipe	Mismatching	1	Similar	Different	0	Correct
M1	Monolingual	277	75	deek	deek	Matching	1	Similar	Same	1	Correct
M1	Monolingual	278	30	dook	dook	Matching	0.02	Dissimilar	Same	1	Correct
M1	Monolingual	279	314	fof	fuff	Mismatching	0	Dissimilar	Different	0	Correct
M1	Monolingual	280	148	fuff	fof	Mismatching	0	Dissimilar	Same	1	Incorrect
M1	Monolingual	281	165	bipe	bope	Mismatching	0.64	Similar	Different	0	Correct
M1	Monolingual	282	167	barp	bawp	Mismatching	0.92	Similar	Same	1	Incorrect
M1	Monolingual	283	215	faf	fof	Mismatching	0.85	Similar	Different	0	Correct
M1	Monolingual	284	236	fuf	faf	Mismatching	0.47	Dissimilar	Same	1	Incorrect
M1	Monolingual	285	102	dake	dake	Matching	0.88	Similar	Same	1	Correct
M1	Monolingual	286	184	barp	bowp	Mismatching	0.21	Dissimilar	Same	1	Incorrect
M1	Monolingual	287	142	fof	fuff	Mismatching	0	Dissimilar	Different	0	Correct
M1	Monolingual	288	124	durk	dook	Mismatching	0.97	Similar	Different	0	Correct
M1	Monolingual	289	116	bowp	barp	Mismatching	0.11	Dissimilar	Different	0	Correct
M1	Monolingual	290	138	deek	durk	Mismatching	1	Similar	Different	0	Correct
M1	Monolingual	291	270	durk	dook	Mismatching	0.95	Similar	Different	0	Correct
M1	Monolingual	292	3	dake	dake	Matching	0.25	Dissimilar	Same	1	Correct
M1	Monolingual	293	195	bowp	bawp	Mismatching	0.92	Similar	Different	0	Correct
M1	Monolingual	294	99	fuf	fuf	Matching	0	Dissimilar	Different	0	Incorrect
M1	Monolingual	295	237	fuf	faf	Mismatching	0.47	Dissimilar	Same	1	Incorrect
M1	Monolingual	296	62	faf	faf	Matching	0.47	Dissimilar	Same	1	Correct
M1	Monolingual	297	250	fof	fuf	Mismatching	0.01	Dissimilar	Same	1	Incorrect
M1	Monolingual	298	106	faf	faf	Matching	0.85	Similar	Same	1	Correct
M1	Monolingual	299	24	bawp	bawp	Matching	0.92	Similar	Same	1	Correct
M1	Monolingual	300	92	dake	dake	Matching	0.88	Similar	Same	1	Correct
M1	Monolingual	301	230	barp	bope	Mismatching	0.01	Dissimilar	Different	0	Correct
M1	Monolingual	302	43	fif	fif	Matching	1	Similar	Same	1	Correct
M1	Monolingual	303	90	barp	barp	Matching	0.63	Similar	Same	1	Correct
M1	Monolingual	304	58	barp	barp	Matching	0.63	Similar	Same	1	Correct
M1	Monolingual	305	183	fof	faf	Mismatching	0.01	Dissimilar	Different	0	Correct
M1	Monolingual	306	171	fuff	fof	Mismatching	0.9	Similar	Same	1	Incorrect
M1	Monolingual	307	119	fof	fif	Mismatching	0	Dissimilar	Different	0	Correct
M1	Monolingual	308	286	fif	fof	Mismatching	0.99	Similar	Different	0	Correct
M1	Monolingual	309	60	fuff	fuff	Matching	0.9	Similar	Same	1	Correct
M1	Monolingual	310	132	durk	dook	Mismatching	0.01	Dissimilar	Different	0	Correct
M1	Monolingual	311	205	fuf	fof	Mismatching	0.01	Dissimilar	Same	1	Incorrect
M1	Monolingual	312	40	deek	deek	Matching	1	Similar	Same	1	Correct
M1	Monolingual	313	318	bowp	bipe	Mismatching	0.21	Dissimilar	Different	0	Correct
M1	Monolingual	314	189	fof	fuf	Mismatching	0.01	Dissimilar	Different	0	Correct
M1	Monolingual	315	281	bope	barp	Mismatching	0.01	Dissimilar	Different	0	Correct
M1	Monolingual	316	9	bope	bope	Matching	0.01	Dissimilar	Same	1	Correct
M1	Monolingual	317	2	fof	fof	Matching	0	Dissimilar	Same	1	Correct
M1	Monolingual	318	317	bowp	barp	Mismatching	0.21	Dissimilar	Same	1	Incorrect
M1	Monolingual	319	97	bipe	bipe	Matching	1	Similar	Same	1	Correct
M1	Monolingual	320	296	barp	bowp	Mismatching	0.63	Similar	Different	0	Correct
M10	Monolingual	1	134	dook	durk	Mismatching	0.95	Similar	Different	0	Correct
M10	Monolingual	2	152	dake	dook	Mismatching	0.88	Similar	Different	0	Correct
M10	Monolingual	3	280	bipe	barp	Mismatching	0.99	Similar	Different	0	Correct
M10	Monolingual	4	250	fof	fuf	Mismatching	0.01	Dissimilar	Different	0	Correct
M10	Monolingual	5	198	deek	durk	Mismatching	0.97	Similar	Different	0	Correct
M10	Monolingual	6	154	bope	bowp	Mismatching	0.64	Similar	Different	0	Correct
M10	Monolingual	7	217	deek	durk	Mismatching	1	Similar	Different	0	Correct
M10	Monolingual	8	172	fuf	fif	Mismatching	1	Similar	Different	0	Correct
M10	Monolingual	9	267	deek	dook	Mismatching	0.01	Dissimilar	Different	0	Correct
M10	Monolingual	10	249	bawp	bowp	Mismatching	0.92	Similar	Different	0	Correct
M10	Monolingual	11	315	bipe	bope	Mismatching	0.99	Similar	Same	1	Incorrect
M10	Monolingual	12	316	bowp	bope	Mismatching	0.21	Dissimilar	Different	0	Correct
M10	Monolingual	13	203	bowp	bope	Mismatching	0.21	Dissimilar	Different	0	Correct
M10	Monolingual	14	26	faf	faf	Matching	0.47	Dissimilar	Different	0	Incorrect
M10	Monolingual	15	274	barp	bawp	Mismatching	0.92	Similar	Different	0	Correct
M10	Monolingual	16	113	bawp	bope	Mismatching	0.01	Dissimilar	Different	0	Correct
M10	Monolingual	17	166	bope	bipe	Mismatching	0.99	Similar	Different	0	Correct
M10	Monolingual	18	201	bowp	barp	Mismatching	1	Similar	Different	0	Correct
M10	Monolingual	19	248	bowp	bope	Mismatching	0.01	Dissimilar	Same	1	Incorrect
M10	Monolingual	20	204	bawp	bipe	Mismatching	1	Similar	Different	0	Correct
M10	Monolingual	21	229	barp	bowp	Mismatching	0.11	Dissimilar	Same	1	Incorrect
M10	Monolingual	22	317	bowp	barp	Mismatching	0.21	Dissimilar	Different	0	Correct
M10	Monolingual	23	67	fuff	fuff	Matching	0.95	Similar	Same	1	Correct
M10	Monolingual	24	117	deek	dake	Mismatching	1	Similar	Different	0	Correct
M10	Monolingual	25	115	fuff	fof	Mismatching	0.01	Dissimilar	Different	0	Correct
M10	Monolingual	26	239	dook	deek	Mismatching	1	Similar	Different	0	Correct
M10	Monolingual	27	146	barp	bope	Mismatching	0.63	Similar	Different	0	Correct
M10	Monolingual	28	289	bowp	bawp	Mismatching	1	Similar	Same	1	Incorrect
M10	Monolingual	29	79	bope	bope	Matching	0.64	Similar	Same	1	Correct
M10	Monolingual	30	11	barp	barp	Matching	1	Similar	Same	1	Correct
M10	Monolingual	31	131	bope	barp	Mismatching	0.01	Dissimilar	Different	0	Correct
M10	Monolingual	32	118	durk	dook	Mismatching	0.02	Dissimilar	Different	0	Correct
M10	Monolingual	33	161	bope	barp	Mismatching	1	Similar	Different	0	Correct
M10	Monolingual	34	5	fof	fof	Matching	0.01	Dissimilar	Different	0	Incorrect
M10	Monolingual	35	99	fuf	fuf	Matching	0	Dissimilar	Different	0	Incorrect
M10	Monolingual	36	301	bope	bawp	Mismatching	0.92	Similar	Different	0	Correct
M10	Monolingual	37	200	faf	fuf	Mismatching	0	Dissimilar	Different	0	Correct
M10	Monolingual	38	54	bope	bope	Matching	0.64	Similar	Same	1	Correct
M10	Monolingual	39	70	bawp	bawp	Matching	0.92	Similar	Different	0	Incorrect
M10	Monolingual	40	100	bipe	bipe	Matching	1	Similar	Same	1	Correct
M10	Monolingual	41	57	bope	bope	Matching	0.01	Dissimilar	Same	1	Correct
M10	Monolingual	42	218	fof	fif	Mismatching	0	Dissimilar	Different	0	Correct
M10	Monolingual	43	6	fif	fif	Matching	1	Similar	Same	1	Correct
M10	Monolingual	44	303	durk	deek	Mismatching	1	Similar	Different	0	Correct
M10	Monolingual	45	122	faf	fuff	Mismatching	0.47	Dissimilar	Different	0	Correct
M10	Monolingual	46	320	fof	fuff	Mismatching	0.9	Similar	Different	0	Correct
M10	Monolingual	47	293	fof	fif	Mismatching	0.99	Similar	Different	0	Correct
M10	Monolingual	48	107	fuf	fuf	Matching	0.01	Dissimilar	Different	0	Incorrect
M10	Monolingual	49	40	deek	deek	Matching	1	Similar	Same	1	Correct
M10	Monolingual	50	97	bipe	bipe	Matching	1	Similar	Same	1	Correct
M10	Monolingual	51	85	bowp	bowp	Matching	0.21	Dissimilar	Same	1	Correct
M10	Monolingual	52	141	faf	fif	Mismatching	0.85	Similar	Different	0	Correct
M10	Monolingual	53	314	fof	fuff	Mismatching	0	Dissimilar	Different	0	Correct
M10	Monolingual	54	94	bowp	bowp	Matching	0.11	Dissimilar	Same	1	Correct
M10	Monolingual	55	237	fuf	faf	Mismatching	0.47	Dissimilar	Same	1	Incorrect
M10	Monolingual	56	319	bipe	bowp	Mismatching	1	Similar	Different	0	Correct
M10	Monolingual	57	121	faf	fuff	Mismatching	0.95	Similar	Different	0	Correct
M10	Monolingual	58	109	fif	fif	Matching	0.99	Similar	Same	1	Correct
M10	Monolingual	59	270	durk	dook	Mismatching	0.95	Similar	Different	0	Correct
M10	Monolingual	60	157	fof	fif	Mismatching	0.99	Similar	Different	0	Correct
M10	Monolingual	61	48	bipe	bipe	Matching	0.99	Similar	Same	1	Correct
M10	Monolingual	62	286	fif	fof	Mismatching	0.99	Similar	Different	0	Correct
M10	Monolingual	63	275	bipe	barp	Mismatching	0.99	Similar	Different	0	Correct
M10	Monolingual	64	77	bawp	bawp	Matching	1	Similar	Same	1	Correct
M10	Monolingual	65	291	dake	deek	Mismatching	1	Similar	Different	0	Correct
M10	Monolingual	66	255	fuf	faf	Mismatching	0	Dissimilar	Different	0	Correct
M10	Monolingual	67	287	bope	bipe	Mismatching	0.64	Similar	Different	0	Correct
M10	Monolingual	68	277	bope	bowp	Mismatching	0.11	Dissimilar	Same	1	Incorrect
M10	Monolingual	69	307	fif	faf	Mismatching	0.47	Dissimilar	Different	0	Correct
M10	Monolingual	70	196	bipe	bowp	Mismatching	1	Similar	Different	0	Correct
M10	Monolingual	71	262	fif	faf	Mismatching	0.47	Dissimilar	Different	0	Correct
M10	Monolingual	72	13	barp	barp	Matching	0.63	Similar	Same	1	Correct
M10	Monolingual	73	207	bawp	bipe	Mismatching	1	Similar	Different	0	Correct
M10	Monolingual	74	14	bipe	bipe	Matching	0.99	Similar	Same	1	Correct
M10	Monolingual	75	212	dook	durk	Mismatching	0.95	Similar	Different	0	Correct
M10	Monolingual	76	278	faf	fof	Mismatching	0.47	Dissimilar	Different	0	Correct
M10	Monolingual	77	72	deek	deek	Matching	1	Similar	Same	1	Correct
M10	Monolingual	78	4	dook	dook	Matching	0.01	Dissimilar	Same	1	Correct
M10	Monolingual	79	119	fof	fif	Mismatching	0	Dissimilar	Different	0	Correct
M10	Monolingual	80	156	bope	barp	Mismatching	1	Similar	Different	0	Correct
M10	Monolingual	81	124	durk	dook	Mismatching	0.97	Similar	Different	0	Correct
M10	Monolingual	82	123	fuf	fif	Mismatching	0.01	Dissimilar	Different	0	Correct
M10	Monolingual	83	68	durk	durk	Matching	0.95	Similar	Same	1	Correct
M10	Monolingual	84	175	durk	dake	Mismatching	0.88	Similar	Different	0	Correct
M10	Monolingual	85	53	durk	durk	Matching	0.95	Similar	Same	1	Correct
M10	Monolingual	86	312	fuf	fuff	Mismatching	0.95	Similar	Different	0	Correct
M10	Monolingual	87	2	fof	fof	Matching	0	Dissimilar	Same	1	Correct
M10	Monolingual	88	56	fof	fof	Matching	0	Dissimilar	Same	1	Correct
M10	Monolingual	89	281	bope	barp	Mismatching	0.01	Dissimilar	Different	0	Correct
M10	Monolingual	90	103	dook	dook	Matching	0.01	Dissimilar	Same	1	Correct
M10	Monolingual	91	133	bipe	bawp	Mismatching	1	Similar	Different	0	Correct
M10	Monolingual	92	16	fof	fof	Matching	0.01	Dissimilar	Different	0	Incorrect
M10	Monolingual	93	21	fof	fof	Matching	0	Dissimilar	Same	1	Correct
M10	Monolingual	94	143	fuff	faf	Mismatching	0.95	Similar	Same	1	Incorrect
M10	Monolingual	95	185	fif	fuff	Mismatching	1	Similar	Different	0	Correct
M10	Monolingual	96	1	deek	deek	Matching	1	Similar	Same	1	Correct
M10	Monolingual	97	236	fuf	faf	Mismatching	0.47	Dissimilar	Same	1	Incorrect
M10	Monolingual	98	101	bowp	bowp	Matching	0.11	Dissimilar	Same	1	Correct
M10	Monolingual	99	310	faf	fuff	Mismatching	0.85	Similar	Different	0	Correct
M10	Monolingual	100	271	fof	faf	Mismatching	0.85	Similar	Different	0	Correct
M10	Monolingual	101	90	barp	barp	Matching	0.63	Similar	Same	1	Correct
M10	Monolingual	102	167	barp	bawp	Mismatching	0.92	Similar	Different	0	Correct
M10	Monolingual	103	257	fuff	fof	Mismatching	0.95	Similar	Different	0	Correct
M10	Monolingual	104	38	dook	dook	Matching	0.01	Dissimilar	Same	1	Correct
M10	Monolingual	105	20	dook	dook	Matching	0.02	Dissimilar	Same	1	Correct
M10	Monolingual	106	302	barp	bipe	Mismatching	0.63	Similar	Different	0	Correct
M10	Monolingual	107	39	deek	deek	Matching	1	Similar	Same	1	Correct
M10	Monolingual	108	158	fof	faf	Mismatching	0.85	Similar	Different	0	Correct
M10	Monolingual	109	214	deek	dook	Mismatching	0.01	Dissimilar	Different	0	Correct
M10	Monolingual	110	19	dake	dake	Matching	0.25	Dissimilar	Same	1	Correct
M10	Monolingual	111	192	bowp	bipe	Mismatching	0.11	Dissimilar	Different	0	Correct
M10	Monolingual	112	269	bawp	bowp	Mismatching	0.11	Dissimilar	Same	1	Incorrect
M10	Monolingual	113	242	faf	fuf	Mismatching	0.01	Dissimilar	Different	0	Correct
M10	Monolingual	114	105	dook	dook	Matching	0.02	Dissimilar	Same	1	Correct
M10	Monolingual	115	228	deek	dook	Mismatching	1	Similar	Different	0	Correct
M10	Monolingual	116	272	durk	deek	Mismatching	1	Similar	Different	0	Correct
M10	Monolingual	117	224	bowp	bawp	Mismatching	0.21	Dissimilar	Different	0	Correct
M10	Monolingual	118	194	barp	bipe	Mismatching	1	Similar	Different	0	Correct
M10	Monolingual	119	102	dake	dake	Matching	0.88	Similar	Same	1	Correct
M10	Monolingual	120	193	dake	dook	Mismatching	0.02	Dissimilar	Different	0	Correct
M10	Monolingual	121	129	barp	bipe	Mismatching	1	Similar	Different	0	Correct
M10	Monolingual	122	282	deek	dook	Mismatching	1	Similar	Different	0	Correct
M10	Monolingual	123	231	fuf	fif	Mismatching	0.01	Dissimilar	Different	0	Correct
M10	Monolingual	124	114	durk	dake	Mismatching	0.97	Similar	Different	0	Correct
M10	Monolingual	125	140	bope	bipe	Mismatching	0.64	Similar	Different	0	Correct
M10	Monolingual	126	135	faf	fof	Mismatching	0.01	Dissimilar	Different	0	Correct
M10	Monolingual	127	69	bawp	bawp	Matching	0.92	Similar	Same	1	Correct
M10	Monolingual	128	220	bowp	bope	Mismatching	0.01	Dissimilar	Same	1	Incorrect
M10	Monolingual	129	37	fuf	fuf	Matching	0.01	Dissimilar	Different	0	Incorrect
M10	Monolingual	130	98	fof	fof	Matching	0.01	Dissimilar	Same	1	Correct
M10	Monolingual	131	285	fof	fuf	Mismatching	0.01	Dissimilar	Same	1	Incorrect
M10	Monolingual	132	168	bipe	bope	Mismatching	0.64	Similar	Different	0	Correct
M10	Monolingual	133	93	bawp	bawp	Matching	1	Similar	Same	1	Correct
M10	Monolingual	134	266	fof	fuf	Mismatching	0.01	Dissimilar	Same	1	Incorrect
M10	Monolingual	135	304	fuff	fuf	Mismatching	0.9	Similar	Same	1	Incorrect
M10	Monolingual	136	148	fuff	fof	Mismatching	0	Dissimilar	Same	1	Incorrect
M10	Monolingual	137	219	barp	bawp	Mismatching	0.63	Similar	Same	1	Incorrect
M10	Monolingual	138	87	fof	fof	Matching	0	Dissimilar	Same	1	Correct
M10	Monolingual	139	112	fuff	fuff	Matching	0.9	Similar	Same	1	Correct
M10	Monolingual	140	182	bipe	barp	Mismatching	0.63	Similar	Different	0	Correct
M10	Monolingual	141	241	dake	durk	Mismatching	0.95	Similar	Same	1	Incorrect
M10	Monolingual	142	245	dake	durk	Mismatching	0.25	Dissimilar	Different	0	Correct
M10	Monolingual	143	256	bipe	barp	Mismatching	0.63	Similar	Different	0	Correct
M10	Monolingual	144	89	bawp	bawp	Matching	1	Similar	Same	1	Correct
M10	Monolingual	145	138	deek	durk	Mismatching	1	Similar	Different	0	Correct
M10	Monolingual	146	247	durk	deek	Mismatching	0.95	Similar	Different	0	Correct
M10	Monolingual	147	151	dook	dake	Mismatching	0.25	Dissimilar	Different	0	Correct
M10	Monolingual	148	155	bawp	bowp	Mismatching	0.11	Dissimilar	Different	0	Correct
M10	Monolingual	149	164	dake	deek	Mismatching	0.25	Dissimilar	Same	1	Incorrect
M10	Monolingual	150	61	durk	durk	Matching	0.97	Similar	Same	1	Correct
M10	Monolingual	151	206	fuf	fuff	Mismatching	0.01	Dissimilar	Same	1	Incorrect
M10	Monolingual	152	28	bipe	bipe	Matching	0.99	Similar	Different	0	Incorrect
M10	Monolingual	153	116	bowp	barp	Mismatching	0.11	Dissimilar	Same	1	Incorrect
M10	Monolingual	154	125	bope	bawp	Mismatching	0.92	Similar	Same	1	Incorrect
M10	Monolingual	155	8	faf	faf	Matching	0.47	Dissimilar	Same	1	Correct
M10	Monolingual	156	96	fuf	fuf	Matching	0	Dissimilar	Different	0	Incorrect
M10	Monolingual	157	142	fof	fuff	Mismatching	0	Dissimilar	Same	1	Incorrect
M10	Monolingual	158	132	durk	dook	Mismatching	0.01	Dissimilar	Different	0	Correct
M10	Monolingual	159	187	fif	fuf	Mismatching	0.99	Similar	Different	0	Correct
M10	Monolingual	160	136	durk	dake	Mismatching	0.95	Similar	Different	0	Correct
M10	Monolingual	161	253	fuf	fof	Mismatching	0.01	Dissimilar	Same	1	Incorrect
M10	Monolingual	162	71	fuff	fuff	Matching	0.95	Similar	Same	1	Correct
M10	Monolingual	163	169	fuff	fif	Mismatching	0.95	Similar	Different	0	Correct
M10	Monolingual	164	313	fuf	fif	Mismatching	1	Similar	Different	0	Correct
M10	Monolingual	165	27	durk	durk	Matching	0.97	Similar	Same	1	Correct
M10	Monolingual	166	23	durk	durk	Matching	0.97	Similar	Same	1	Correct
M10	Monolingual	167	294	bowp	barp	Mismatching	0.63	Similar	Same	1	Incorrect
M10	Monolingual	168	42	bope	bope	Matching	0.64	Similar	Same	1	Correct
M10	Monolingual	169	309	bipe	bawp	Mismatching	1	Similar	Different	0	Correct
M10	Monolingual	170	297	faf	fif	Mismatching	0.85	Similar	Different	0	Correct
M10	Monolingual	171	159	fif	fuf	Mismatching	0.99	Similar	Different	0	Correct
M10	Monolingual	172	240	fif	fuff	Mismatching	1	Similar	Different	0	Correct
M10	Monolingual	173	111	bope	bope	Matching	0.01	Dissimilar	Same	1	Correct
M10	Monolingual	174	139	fif	fuff	Mismatching	0.95	Similar	Different	0	Correct
M10	Monolingual	175	288	fof	fuff	Mismatching	0.9	Similar	Same	1	Incorrect
M10	Monolingual	176	268	faf	fuf	Mismatching	0.47	Dissimilar	Same	1	Incorrect
M10	Monolingual	177	222	deek	dake	Mismatching	0.88	Similar	Same	1	Incorrect
M10	Monolingual	178	276	deek	dake	Mismatching	1	Similar	Different	0	Correct
M10	Monolingual	179	273	bawp	bope	Mismatching	0.01	Dissimilar	Same	1	Incorrect
M10	Monolingual	180	22	bipe	bipe	Matching	0.99	Similar	Same	1	Correct
M10	Monolingual	181	127	dook	deek	Mismatching	0.02	Dissimilar	Different	0	Correct
M10	Monolingual	182	171	fuff	fof	Mismatching	0.9	Similar	Same	1	Incorrect
M10	Monolingual	183	130	fuff	fuf	Mismatching	0	Dissimilar	Different	0	Correct
M10	Monolingual	184	50	deek	deek	Matching	1	Similar	Same	1	Correct
M10	Monolingual	185	80	faf	faf	Matching	0.85	Similar	Same	1	Correct
M10	Monolingual	186	215	faf	fof	Mismatching	0.85	Similar	Different	0	Correct
M10	Monolingual	187	92	dake	dake	Matching	0.88	Similar	Same	1	Correct
M10	Monolingual	188	32	bowp	bowp	Matching	0.11	Dissimilar	Same	1	Correct
M10	Monolingual	189	47	faf	faf	Matching	0.85	Similar	Same	1	Correct
M10	Monolingual	190	180	fif	faf	Mismatching	0.99	Similar	Same	1	Incorrect
M10	Monolingual	191	35	fuff	fuff	Matching	0.95	Similar	Same	1	Correct
M10	Monolingual	192	199	durk	deek	Mismatching	0.95	Similar	Different	0	Correct
M10	Monolingual	193	12	fif	fif	Matching	0.99	Similar	Same	1	Correct
M10	Monolingual	194	95	faf	faf	Matching	0.47	Dissimilar	Same	1	Correct
M10	Monolingual	195	76	barp	barp	Matching	1	Similar	Same	1	Correct
M10	Monolingual	196	181	bawp	bipe	Mismatching	1	Similar	Different	0	Correct
M10	Monolingual	197	305	bipe	bowp	Mismatching	0.21	Dissimilar	Different	0	Correct
M10	Monolingual	198	211	fuff	faf	Mismatching	0.9	Similar	Different	0	Correct
M10	Monolingual	199	208	faf	fuf	Mismatching	0.85	Similar	Same	1	Incorrect
M10	Monolingual	200	62	faf	faf	Matching	0.47	Dissimilar	Same	1	Correct
M10	Monolingual	201	292	dook	deek	Mismatching	0.02	Dissimilar	Different	0	Correct
M10	Monolingual	202	52	bowp	bowp	Matching	0.21	Dissimilar	Same	1	Correct
M10	Monolingual	203	106	faf	faf	Matching	0.85	Similar	Same	1	Correct
M10	Monolingual	204	232	fuff	fif	Mismatching	0.99	Similar	Different	0	Correct
M10	Monolingual	205	176	faf	fuff	Mismatching	0.9	Similar	Different	0	Correct
M10	Monolingual	206	264	dook	deek	Mismatching	1	Similar	Different	0	Correct
M10	Monolingual	207	9	bope	bope	Matching	0.01	Dissimilar	Same	1	Correct
M10	Monolingual	208	51	deek	deek	Matching	1	Similar	Different	0	Incorrect
M10	Monolingual	209	145	faf	fif	Mismatching	1	Similar	Same	1	Incorrect
M10	Monolingual	210	295	deek	dake	Mismatching	0.88	Similar	Different	0	Correct
M10	Monolingual	211	279	fif	fof	Mismatching	0.99	Similar	Different	0	Correct
M10	Monolingual	212	30	dook	dook	Matching	0.02	Dissimilar	Same	1	Correct
M10	Monolingual	213	3	dake	dake	Matching	0.25	Dissimilar	Same	1	Correct
M10	Monolingual	214	202	fuf	fuff	Mismatching	0.95	Similar	Different	0	Correct
M10	Monolingual	215	165	bipe	bope	Mismatching	0.64	Similar	Different	0	Correct
M10	Monolingual	216	82	bipe	bipe	Matching	1	Similar	Same	1	Correct
M10	Monolingual	217	173	bipe	bowp	Mismatching	0.21	Dissimilar	Different	0	Correct
M10	Monolingual	218	210	bope	bawp	Mismatching	0.64	Similar	Same	1	Incorrect
M10	Monolingual	219	265	bowp	bawp	Mismatching	0.11	Dissimilar	Same	1	Incorrect
M10	Monolingual	220	251	barp	bope	Mismatching	0.64	Similar	Different	0	Correct
M10	Monolingual	221	64	fuf	fuf	Matching	0.01	Dissimilar	Different	0	Incorrect
M10	Monolingual	222	318	bowp	bipe	Mismatching	0.21	Dissimilar	Different	0	Correct
M10	Monolingual	223	108	durk	durk	Matching	0.95	Similar	Same	1	Correct
M10	Monolingual	224	258	bawp	bope	Mismatching	1	Similar	Same	1	Incorrect
M10	Monolingual	225	179	faf	fof	Mismatching	0	Dissimilar	Different	0	Correct
M10	Monolingual	226	259	bope	bipe	Mismatching	0.99	Similar	Different	0	Correct
M10	Monolingual	227	128	fuff	fuf	Mismatching	0	Dissimilar	Different	0	Correct
M10	Monolingual	228	308	bope	bowp	Mismatching	0.64	Similar	Different	0	Correct
M10	Monolingual	229	195	bowp	bawp	Mismatching	0.92	Similar	Different	0	Correct
M10	Monolingual	230	238	bipe	bawp	Mismatching	1	Similar	Different	0	Correct
M10	Monolingual	231	283	barp	bawp	Mismatching	0.63	Similar	Different	0	Correct
M10	Monolingual	232	86	bowp	bowp	Matching	0.21	Dissimilar	Same	1	Correct
M10	Monolingual	233	83	fif	fif	Matching	0.99	Similar	Same	1	Correct
M10	Monolingual	234	15	bowp	bowp	Matching	0.21	Dissimilar	Same	1	Correct
M10	Monolingual	235	216	barp	bipe	Mismatching	0.99	Similar	Different	0	Correct
M10	Monolingual	236	49	barp	barp	Matching	1	Similar	Same	1	Correct
M10	Monolingual	237	298	bawp	bope	Mismatching	1	Similar	Different	0	Correct
M10	Monolingual	238	209	dook	dake	Mismatching	0.25	Dissimilar	Different	0	Correct
M10	Monolingual	239	178	bowp	bipe	Mismatching	1	Similar	Different	0	Correct
M10	Monolingual	240	233	fuf	fuff	Mismatching	0.01	Dissimilar	Same	1	Incorrect
M10	Monolingual	241	306	fif	faf	Mismatching	0.99	Similar	Same	1	Incorrect
M10	Monolingual	242	43	fif	fif	Matching	1	Similar	Same	1	Correct
M10	Monolingual	243	189	fof	fuf	Mismatching	0.01	Dissimilar	Different	0	Correct
M10	Monolingual	244	75	deek	deek	Matching	1	Similar	Same	1	Correct
M10	Monolingual	245	44	deek	deek	Matching	1	Similar	Same	1	Correct
M10	Monolingual	246	234	dook	dake	Mismatching	0.01	Dissimilar	Different	0	Correct
M10	Monolingual	247	45	bawp	bawp	Matching	0.92	Similar	Different	0	Incorrect
M10	Monolingual	248	126	dake	dook	Mismatching	0.02	Dissimilar	Different	0	Correct
M10	Monolingual	249	60	fuff	fuff	Matching	0.9	Similar	Different	0	Incorrect
M10	Monolingual	250	24	bawp	bawp	Matching	0.92	Similar	Different	0	Incorrect
M10	Monolingual	251	17	bope	bope	Matching	0.01	Dissimilar	Same	1	Correct
M10	Monolingual	252	55	fuff	fuff	Matching	0.9	Similar	Same	1	Correct
M10	Monolingual	253	252	dook	dake	Mismatching	0.01	Dissimilar	Different	0	Correct
M10	Monolingual	254	223	fof	faf	Mismatching	0.01	Dissimilar	Different	0	Correct
M10	Monolingual	255	78	bowp	bowp	Matching	0.11	Dissimilar	Same	1	Correct
M10	Monolingual	256	263	fif	fof	Mismatching	0	Dissimilar	Different	0	Correct
M10	Monolingual	257	66	fif	fif	Matching	1	Similar	Same	1	Correct
M10	Monolingual	258	296	barp	bowp	Mismatching	0.63	Similar	Different	0	Correct
M10	Monolingual	259	36	fuf	fuf	Matching	0.01	Dissimilar	Different	0	Incorrect
M10	Monolingual	260	147	fif	fof	Mismatching	0	Dissimilar	Different	0	Correct
M10	Monolingual	261	290	fuff	fif	Mismatching	1	Similar	Different	0	Correct
M10	Monolingual	262	235	bawp	barp	Mismatching	1	Similar	Different	0	Correct
M10	Monolingual	263	74	fif	fif	Matching	0.99	Similar	Same	1	Correct
M10	Monolingual	264	170	dook	durk	Mismatching	0.01	Dissimilar	Different	0	Correct
M10	Monolingual	265	230	barp	bope	Mismatching	0.01	Dissimilar	Different	0	Correct
M10	Monolingual	266	261	dake	dook	Mismatching	0.88	Similar	Different	0	Correct
M10	Monolingual	267	205	fuf	fof	Mismatching	0.01	Dissimilar	Same	1	Incorrect
M10	Monolingual	268	183	fof	faf	Mismatching	0.01	Dissimilar	Different	0	Correct
M10	Monolingual	269	18	barp	barp	Matching	0.63	Similar	Same	1	Correct
M10	Monolingual	270	311	fuff	fuf	Mismatching	0.9	Similar	Same	1	Incorrect
M10	Monolingual	271	190	durk	dake	Mismatching	0.25	Dissimilar	Different	0	Correct
M10	Monolingual	272	10	fuff	fuff	Matching	0.9	Similar	Same	1	Correct
M10	Monolingual	273	299	dake	durk	Mismatching	0.97	Similar	Different	0	Correct
M10	Monolingual	274	213	deek	durk	Mismatching	0.97	Similar	Different	0	Correct
M10	Monolingual	275	221	fuf	fof	Mismatching	0.01	Dissimilar	Same	1	Incorrect
M10	Monolingual	276	177	dake	deek	Mismatching	0.88	Similar	Different	0	Correct
M10	Monolingual	277	284	bowp	bipe	Mismatching	0.99	Similar	Different	0	Correct
M10	Monolingual	278	7	bawp	bawp	Matching	1	Similar	Same	1	Correct
M10	Monolingual	279	33	dake	dake	Matching	0.25	Dissimilar	Same	1	Correct
M10	Monolingual	280	162	bawp	bipe	Mismatching	1	Similar	Different	0	Correct
M10	Monolingual	281	150	dake	durk	Mismatching	0.88	Similar	Different	0	Correct
M10	Monolingual	282	149	bipe	bope	Mismatching	0.99	Similar	Different	0	Correct
M10	Monolingual	283	59	fuf	fuf	Matching	0	Dissimilar	Same	1	Correct
M10	Monolingual	284	197	fuf	fof	Mismatching	0.01	Dissimilar	Same	1	Incorrect
M10	Monolingual	285	186	bawp	barp	Mismatching	1	Similar	Same	1	Incorrect
M10	Monolingual	286	244	faf	fif	Mismatching	1	Similar	Different	0	Correct
M10	Monolingual	287	243	fuf	faf	Mismatching	0	Dissimilar	Same	1	Incorrect
M10	Monolingual	288	225	dake	deek	Mismatching	1	Similar	Different	0	Correct
M10	Monolingual	289	73	dake	dake	Matching	0.88	Similar	Same	1	Correct
M10	Monolingual	290	160	bawp	bowp	Mismatching	0.92	Similar	Different	0	Correct
M10	Monolingual	291	227	fif	fuff	Mismatching	0.95	Similar	Same	1	Incorrect
M10	Monolingual	292	84	dake	dake	Matching	0.25	Dissimilar	Same	1	Correct
M10	Monolingual	293	31	dake	dake	Matching	0.88	Similar	Same	1	Correct
M10	Monolingual	294	104	durk	durk	Matching	0.95	Similar	Same	1	Correct
M10	Monolingual	295	153	bawp	barp	Mismatching	1	Similar	Different	0	Correct
M10	Monolingual	296	254	bope	bawp	Mismatching	0.64	Similar	Same	1	Incorrect
M10	Monolingual	297	81	durk	durk	Matching	0.97	Similar	Same	1	Correct
M10	Monolingual	298	191	bawp	barp	Mismatching	1	Similar	Different	0	Correct
M10	Monolingual	299	34	fuf	fuf	Matching	0	Dissimilar	Same	1	Correct
M10	Monolingual	300	120	bope	bowp	Mismatching	0.11	Dissimilar	Same	1	Incorrect
M10	Monolingual	301	260	dook	durk	Mismatching	0.01	Dissimilar	Different	0	Correct
M10	Monolingual	302	29	dook	dook	Matching	0.02	Dissimilar	Same	1	Correct
M10	Monolingual	303	46	bope	bope	Matching	0.64	Similar	Same	1	Correct
M10	Monolingual	304	25	bipe	bipe	Matching	1	Similar	Different	0	Incorrect
M10	Monolingual	305	226	barp	bowp	Mismatching	1	Similar	Different	0	Correct
M10	Monolingual	306	144	fif	fuf	Mismatching	0	Dissimilar	Same	1	Incorrect
M10	Monolingual	307	63	fof	fof	Matching	0.01	Dissimilar	Same	1	Correct
M10	Monolingual	308	41	faf	faf	Matching	0.85	Similar	Same	1	Correct
M10	Monolingual	309	300	barp	bope	Mismatching	1	Similar	Different	0	Correct
M10	Monolingual	310	88	fuff	fuff	Matching	0.95	Similar	Same	1	Correct
M10	Monolingual	311	188	fuff	fif	Mismatching	0.9	Similar	Different	0	Correct
M10	Monolingual	312	137	fif	fuf	Mismatching	0	Dissimilar	Same	1	Incorrect
M10	Monolingual	313	174	bipe	bawp	Mismatching	1	Similar	Different	0	Correct
M10	Monolingual	314	65	dook	dook	Matching	0.01	Dissimilar	Same	1	Correct
M10	Monolingual	315	246	fuff	faf	Mismatching	0.85	Similar	Different	0	Correct
M10	Monolingual	316	58	barp	barp	Matching	0.63	Similar	Different	0	Incorrect
M10	Monolingual	317	184	barp	bowp	Mismatching	0.21	Dissimilar	Different	0	Correct
M10	Monolingual	318	110	barp	barp	Matching	1	Similar	Same	1	Correct
M10	Monolingual	319	163	fuff	faf	Mismatching	0.47	Dissimilar	Different	0	Correct
M10	Monolingual	320	91	fif	fif	Matching	1	Similar	Same	1	Correct
M11	Monolingual	1	1	deek	deek	Matching	1	Similar	Same	1	Correct
M11	Monolingual	2	113	bawp	bope	Mismatching	0.01	Dissimilar	Different	0	Correct
M11	Monolingual	3	114	durk	dake	Mismatching	0.97	Similar	Different	0	Correct
M11	Monolingual	4	115	fuff	fof	Mismatching	0.01	Dissimilar	Different	0	Correct
M11	Monolingual	5	2	fof	fof	Matching	0	Dissimilar	Same	1	Correct
M11	Monolingual	6	3	dake	dake	Matching	0.25	Dissimilar	Same	1	Correct
M11	Monolingual	7	4	dook	dook	Matching	0.01	Dissimilar	Same	1	Correct
M11	Monolingual	8	5	fof	fof	Matching	0.01	Dissimilar	Different	0	Incorrect
M11	Monolingual	9	6	fif	fif	Matching	1	Similar	Same	1	Correct
M11	Monolingual	10	116	bowp	barp	Mismatching	0.11	Dissimilar	Different	0	Correct
M11	Monolingual	11	7	bawp	bawp	Matching	1	Similar	Same	1	Correct
M11	Monolingual	12	8	faf	faf	Matching	0.47	Dissimilar	Same	1	Correct
M11	Monolingual	13	9	bope	bope	Matching	0.01	Dissimilar	Same	1	Correct
M11	Monolingual	14	117	deek	dake	Mismatching	1	Similar	Different	0	Correct
M11	Monolingual	15	10	fuff	fuff	Matching	0.9	Similar	Same	1	Correct
M11	Monolingual	16	11	barp	barp	Matching	1	Similar	Same	1	Correct
M11	Monolingual	17	12	fif	fif	Matching	0.99	Similar	Same	1	Correct
M11	Monolingual	18	118	durk	dook	Mismatching	0.02	Dissimilar	Different	0	Correct
M11	Monolingual	19	119	fof	fif	Mismatching	0	Dissimilar	Different	0	Correct
M11	Monolingual	20	120	bope	bowp	Mismatching	0.11	Dissimilar	Different	0	Correct
M11	Monolingual	21	121	faf	fuff	Mismatching	0.95	Similar	Different	0	Correct
M11	Monolingual	22	13	barp	barp	Matching	0.63	Similar	Same	1	Correct
M11	Monolingual	23	122	faf	fuff	Mismatching	0.47	Dissimilar	Different	0	Correct
M11	Monolingual	24	123	fuf	fif	Mismatching	0.01	Dissimilar	Different	0	Correct
M11	Monolingual	25	124	durk	dook	Mismatching	0.97	Similar	Different	0	Correct
M11	Monolingual	26	125	bope	bawp	Mismatching	0.92	Similar	Same	1	Incorrect
M11	Monolingual	27	14	bipe	bipe	Matching	0.99	Similar	Same	1	Correct
M11	Monolingual	28	15	bowp	bowp	Matching	0.21	Dissimilar	Same	1	Correct
M11	Monolingual	29	16	fof	fof	Matching	0.01	Dissimilar	Same	1	Correct
M11	Monolingual	30	126	dake	dook	Mismatching	0.02	Dissimilar	Different	0	Correct
M11	Monolingual	31	127	dook	deek	Mismatching	0.02	Dissimilar	Different	0	Correct
M11	Monolingual	32	128	fuff	fuf	Mismatching	0	Dissimilar	Same	1	Incorrect
M11	Monolingual	33	129	barp	bipe	Mismatching	1	Similar	Different	0	Correct
M11	Monolingual	34	130	fuff	fuf	Mismatching	0	Dissimilar	Same	1	Incorrect
M11	Monolingual	35	131	bope	barp	Mismatching	0.01	Dissimilar	Different	0	Correct
M11	Monolingual	36	17	bope	bope	Matching	0.01	Dissimilar	Same	1	Correct
M11	Monolingual	37	132	durk	dook	Mismatching	0.01	Dissimilar	Different	0	Correct
M11	Monolingual	38	133	bipe	bawp	Mismatching	1	Similar	Different	0	Correct
M11	Monolingual	39	134	dook	durk	Mismatching	0.95	Similar	Different	0	Correct
M11	Monolingual	40	135	faf	fof	Mismatching	0.01	Dissimilar	Different	0	Correct
M11	Monolingual	41	136	durk	dake	Mismatching	0.95	Similar	Different	0	Correct
M11	Monolingual	42	137	fif	fuf	Mismatching	0	Dissimilar	Different	0	Correct
M11	Monolingual	43	138	deek	durk	Mismatching	1	Similar	Different	0	Correct
M11	Monolingual	44	139	fif	fuff	Mismatching	0.95	Similar	Different	0	Correct
M11	Monolingual	45	140	bope	bipe	Mismatching	0.64	Similar	Different	0	Correct
M11	Monolingual	46	18	barp	barp	Matching	0.63	Similar	Same	1	Correct
M11	Monolingual	47	19	dake	dake	Matching	0.25	Dissimilar	Different	0	Incorrect
M11	Monolingual	48	20	dook	dook	Matching	0.02	Dissimilar	Same	1	Correct
M11	Monolingual	49	21	fof	fof	Matching	0	Dissimilar	Same	1	Correct
M11	Monolingual	50	22	bipe	bipe	Matching	0.99	Similar	Same	1	Correct
M11	Monolingual	51	141	faf	fif	Mismatching	0.85	Similar	Different	0	Correct
M11	Monolingual	52	142	fof	fuff	Mismatching	0	Dissimilar	Different	0	Correct
M11	Monolingual	53	143	fuff	faf	Mismatching	0.95	Similar	Different	0	Correct
M11	Monolingual	54	23	durk	durk	Matching	0.97	Similar	Same	1	Correct
M11	Monolingual	55	24	bawp	bawp	Matching	0.92	Similar	Same	1	Correct
M11	Monolingual	56	144	fif	fuf	Mismatching	0	Dissimilar	Different	0	Correct
M11	Monolingual	57	25	bipe	bipe	Matching	1	Similar	Same	1	Correct
M11	Monolingual	58	145	faf	fif	Mismatching	1	Similar	Different	0	Correct
M11	Monolingual	59	146	barp	bope	Mismatching	0.63	Similar	Different	0	Correct
M11	Monolingual	60	147	fif	fof	Mismatching	0	Dissimilar	Different	0	Correct
M11	Monolingual	61	148	fuff	fof	Mismatching	0	Dissimilar	Different	0	Correct
M11	Monolingual	62	26	faf	faf	Matching	0.47	Dissimilar	Same	1	Correct
M11	Monolingual	63	149	bipe	bope	Mismatching	0.99	Similar	Different	0	Correct
M11	Monolingual	64	27	durk	durk	Matching	0.97	Similar	Same	1	Correct
M11	Monolingual	65	28	bipe	bipe	Matching	0.99	Similar	Same	1	Correct
M11	Monolingual	66	150	dake	durk	Mismatching	0.88	Similar	Different	0	Correct
M11	Monolingual	67	151	dook	dake	Mismatching	0.25	Dissimilar	Different	0	Correct
M11	Monolingual	68	152	dake	dook	Mismatching	0.88	Similar	Different	0	Correct
M11	Monolingual	69	153	bawp	barp	Mismatching	1	Similar	Different	0	Correct
M11	Monolingual	70	154	bope	bowp	Mismatching	0.64	Similar	Same	1	Incorrect
M11	Monolingual	71	155	bawp	bowp	Mismatching	0.11	Dissimilar	Different	0	Correct
M11	Monolingual	72	156	bope	barp	Mismatching	1	Similar	Different	0	Correct
M11	Monolingual	73	157	fof	fif	Mismatching	0.99	Similar	Different	0	Correct
M11	Monolingual	74	158	fof	faf	Mismatching	0.85	Similar	Different	0	Correct
M11	Monolingual	75	29	dook	dook	Matching	0.02	Dissimilar	Same	1	Correct
M11	Monolingual	76	159	fif	fuf	Mismatching	0.99	Similar	Different	0	Correct
M11	Monolingual	77	160	bawp	bowp	Mismatching	0.92	Similar	Different	0	Correct
M11	Monolingual	78	161	bope	barp	Mismatching	1	Similar	Different	0	Correct
M11	Monolingual	79	162	bawp	bipe	Mismatching	1	Similar	Different	0	Correct
M11	Monolingual	80	30	dook	dook	Matching	0.02	Dissimilar	Same	1	Correct
M11	Monolingual	81	31	dake	dake	Matching	0.88	Similar	Same	1	Correct
M11	Monolingual	82	163	fuff	faf	Mismatching	0.47	Dissimilar	Different	0	Correct
M11	Monolingual	83	32	bowp	bowp	Matching	0.11	Dissimilar	Same	1	Correct
M11	Monolingual	84	164	dake	deek	Mismatching	0.25	Dissimilar	Different	0	Correct
M11	Monolingual	85	33	dake	dake	Matching	0.25	Dissimilar	Same	1	Correct
M11	Monolingual	86	165	bipe	bope	Mismatching	0.64	Similar	Different	0	Correct
M11	Monolingual	87	166	bope	bipe	Mismatching	0.99	Similar	Different	0	Correct
M11	Monolingual	88	34	fuf	fuf	Matching	0	Dissimilar	Different	0	Incorrect
M11	Monolingual	89	167	barp	bawp	Mismatching	0.92	Similar	Different	0	Correct
M11	Monolingual	90	168	bipe	bope	Mismatching	0.64	Similar	Different	0	Correct
M11	Monolingual	91	169	fuff	fif	Mismatching	0.95	Similar	Different	0	Correct
M11	Monolingual	92	170	dook	durk	Mismatching	0.01	Dissimilar	Different	0	Correct
M11	Monolingual	93	171	fuff	fof	Mismatching	0.9	Similar	Same	1	Incorrect
M11	Monolingual	94	172	fuf	fif	Mismatching	1	Similar	Different	0	Correct
M11	Monolingual	95	173	bipe	bowp	Mismatching	0.21	Dissimilar	Different	0	Correct
M11	Monolingual	96	174	bipe	bawp	Mismatching	1	Similar	Different	0	Correct
M11	Monolingual	97	175	durk	dake	Mismatching	0.88	Similar	Different	0	Correct
M11	Monolingual	98	176	faf	fuff	Mismatching	0.9	Similar	Different	0	Correct
M11	Monolingual	99	35	fuff	fuff	Matching	0.95	Similar	Same	1	Correct
M11	Monolingual	100	177	dake	deek	Mismatching	0.88	Similar	Different	0	Correct
M11	Monolingual	101	178	bowp	bipe	Mismatching	1	Similar	Different	0	Correct
M11	Monolingual	102	179	faf	fof	Mismatching	0	Dissimilar	Different	0	Correct
M11	Monolingual	103	36	fuf	fuf	Matching	0.01	Dissimilar	Same	1	Correct
M11	Monolingual	104	180	fif	faf	Mismatching	0.99	Similar	Different	0	Correct
M11	Monolingual	105	37	fuf	fuf	Matching	0.01	Dissimilar	Different	0	Incorrect
M11	Monolingual	106	38	dook	dook	Matching	0.01	Dissimilar	Same	1	Correct
M11	Monolingual	107	181	bawp	bipe	Mismatching	1	Similar	Different	0	Correct
M11	Monolingual	108	182	bipe	barp	Mismatching	0.63	Similar	Different	0	Correct
M11	Monolingual	109	183	fof	faf	Mismatching	0.01	Dissimilar	Different	0	Correct
M11	Monolingual	110	184	barp	bowp	Mismatching	0.21	Dissimilar	Same	1	Incorrect
M11	Monolingual	111	185	fif	fuff	Mismatching	1	Similar	Different	0	Correct
M11	Monolingual	112	186	bawp	barp	Mismatching	1	Similar	Different	0	Correct
M11	Monolingual	113	39	deek	deek	Matching	1	Similar	Same	1	Correct
M11	Monolingual	114	187	fif	fuf	Mismatching	0.99	Similar	Different	0	Correct
M11	Monolingual	115	188	fuff	fif	Mismatching	0.9	Similar	Different	0	Correct
M11	Monolingual	116	189	fof	fuf	Mismatching	0.01	Dissimilar	Same	1	Incorrect
M11	Monolingual	117	40	deek	deek	Matching	1	Similar	Same	1	Correct
M11	Monolingual	118	41	faf	faf	Matching	0.85	Similar	Same	1	Correct
M11	Monolingual	119	190	durk	dake	Mismatching	0.25	Dissimilar	Different	0	Correct
M11	Monolingual	120	191	bawp	barp	Mismatching	1	Similar	Different	0	Correct
M11	Monolingual	121	42	bope	bope	Matching	0.64	Similar	Same	1	Correct
M11	Monolingual	122	43	fif	fif	Matching	1	Similar	Same	1	Correct
M11	Monolingual	123	44	deek	deek	Matching	1	Similar	Same	1	Correct
M11	Monolingual	124	192	bowp	bipe	Mismatching	0.11	Dissimilar	Different	0	Correct
M11	Monolingual	125	193	dake	dook	Mismatching	0.02	Dissimilar	Different	0	Correct
M11	Monolingual	126	194	barp	bipe	Mismatching	1	Similar	Different	0	Correct
M11	Monolingual	127	195	bowp	bawp	Mismatching	0.92	Similar	Different	0	Correct
M11	Monolingual	128	196	bipe	bowp	Mismatching	1	Similar	Different	0	Correct
M11	Monolingual	129	197	fuf	fof	Mismatching	0.01	Dissimilar	Same	1	Incorrect
M11	Monolingual	130	198	deek	durk	Mismatching	0.97	Similar	Different	0	Correct
M11	Monolingual	131	199	durk	deek	Mismatching	0.95	Similar	Different	0	Correct
M11	Monolingual	132	45	bawp	bawp	Matching	0.92	Similar	Same	1	Correct
M11	Monolingual	133	200	faf	fuf	Mismatching	0	Dissimilar	Different	0	Correct
M11	Monolingual	134	201	bowp	barp	Mismatching	1	Similar	Different	0	Correct
M11	Monolingual	135	46	bope	bope	Matching	0.64	Similar	Same	1	Correct
M11	Monolingual	136	47	faf	faf	Matching	0.85	Similar	Same	1	Correct
M11	Monolingual	137	202	fuf	fuff	Mismatching	0.95	Similar	Same	1	Incorrect
M11	Monolingual	138	48	bipe	bipe	Matching	0.99	Similar	Same	1	Correct
M11	Monolingual	139	49	barp	barp	Matching	1	Similar	Same	1	Correct
M11	Monolingual	140	203	bowp	bope	Mismatching	0.21	Dissimilar	Different	0	Correct
M11	Monolingual	141	204	bawp	bipe	Mismatching	1	Similar	Different	0	Correct
M11	Monolingual	142	50	deek	deek	Matching	1	Similar	Same	1	Correct
M11	Monolingual	143	51	deek	deek	Matching	1	Similar	Different	0	Incorrect
M11	Monolingual	144	205	fuf	fof	Mismatching	0.01	Dissimilar	Same	1	Incorrect
M11	Monolingual	145	52	bowp	bowp	Matching	0.21	Dissimilar	Same	1	Correct
M11	Monolingual	146	206	fuf	fuff	Mismatching	0.01	Dissimilar	Same	1	Incorrect
M11	Monolingual	147	207	bawp	bipe	Mismatching	1	Similar	Different	0	Correct
M11	Monolingual	148	53	durk	durk	Matching	0.95	Similar	Same	1	Correct
M11	Monolingual	149	208	faf	fuf	Mismatching	0.85	Similar	Same	1	Incorrect
M11	Monolingual	150	54	bope	bope	Matching	0.64	Similar	Same	1	Correct
M11	Monolingual	151	55	fuff	fuff	Matching	0.9	Similar	Same	1	Correct
M11	Monolingual	152	209	dook	dake	Mismatching	0.25	Dissimilar	Different	0	Correct
M11	Monolingual	153	56	fof	fof	Matching	0	Dissimilar	Same	1	Correct
M11	Monolingual	154	57	bope	bope	Matching	0.01	Dissimilar	Same	1	Correct
M11	Monolingual	155	210	bope	bawp	Mismatching	0.64	Similar	Different	0	Correct
M11	Monolingual	156	211	fuff	faf	Mismatching	0.9	Similar	Different	0	Correct
M11	Monolingual	157	58	barp	barp	Matching	0.63	Similar	Same	1	Correct
M11	Monolingual	158	212	dook	durk	Mismatching	0.95	Similar	Different	0	Correct
M11	Monolingual	159	59	fuf	fuf	Matching	0	Dissimilar	Different	0	Incorrect
M11	Monolingual	160	213	deek	durk	Mismatching	0.97	Similar	Different	0	Correct
M11	Monolingual	161	60	fuff	fuff	Matching	0.9	Similar	Same	1	Correct
M11	Monolingual	162	61	durk	durk	Matching	0.97	Similar	Same	1	Correct
M11	Monolingual	163	62	faf	faf	Matching	0.47	Dissimilar	Same	1	Correct
M11	Monolingual	164	214	deek	dook	Mismatching	0.01	Dissimilar	Same	1	Incorrect
M11	Monolingual	165	63	fof	fof	Matching	0.01	Dissimilar	Same	1	Correct
M11	Monolingual	166	215	faf	fof	Mismatching	0.85	Similar	Different	0	Correct
M11	Monolingual	167	216	barp	bipe	Mismatching	0.99	Similar	Different	0	Correct
M11	Monolingual	168	217	deek	durk	Mismatching	1	Similar	Different	0	Correct
M11	Monolingual	169	64	fuf	fuf	Matching	0.01	Dissimilar	Different	0	Incorrect
M11	Monolingual	170	65	dook	dook	Matching	0.01	Dissimilar	Same	1	Correct
M11	Monolingual	171	218	fof	fif	Mismatching	0	Dissimilar	Different	0	Correct
M11	Monolingual	172	219	barp	bawp	Mismatching	0.63	Similar	Different	0	Correct
M11	Monolingual	173	220	bowp	bope	Mismatching	0.01	Dissimilar	Different	0	Correct
M11	Monolingual	174	66	fif	fif	Matching	1	Similar	Same	1	Correct
M11	Monolingual	175	221	fuf	fof	Mismatching	0.01	Dissimilar	Same	1	Incorrect
M11	Monolingual	176	67	fuff	fuff	Matching	0.95	Similar	Same	1	Correct
M11	Monolingual	177	222	deek	dake	Mismatching	0.88	Similar	Different	0	Correct
M11	Monolingual	178	68	durk	durk	Matching	0.95	Similar	Same	1	Correct
M11	Monolingual	179	223	fof	faf	Mismatching	0.01	Dissimilar	Different	0	Correct
M11	Monolingual	180	224	bowp	bawp	Mismatching	0.21	Dissimilar	Same	1	Incorrect
M11	Monolingual	181	225	dake	deek	Mismatching	1	Similar	Different	0	Correct
M11	Monolingual	182	226	barp	bowp	Mismatching	1	Similar	Different	0	Correct
M11	Monolingual	183	69	bawp	bawp	Matching	0.92	Similar	Same	1	Correct
M11	Monolingual	184	70	bawp	bawp	Matching	0.92	Similar	Same	1	Correct
M11	Monolingual	185	227	fif	fuff	Mismatching	0.95	Similar	Different	0	Correct
M11	Monolingual	186	71	fuff	fuff	Matching	0.95	Similar	Same	1	Correct
M11	Monolingual	187	72	deek	deek	Matching	1	Similar	Same	1	Correct
M11	Monolingual	188	228	deek	dook	Mismatching	1	Similar	Different	0	Correct
M11	Monolingual	189	73	dake	dake	Matching	0.88	Similar	Same	1	Correct
M11	Monolingual	190	229	barp	bowp	Mismatching	0.11	Dissimilar	Different	0	Correct
M11	Monolingual	191	74	fif	fif	Matching	0.99	Similar	Same	1	Correct
M11	Monolingual	192	230	barp	bope	Mismatching	0.01	Dissimilar	Different	0	Correct
M11	Monolingual	193	231	fuf	fif	Mismatching	0.01	Dissimilar	Different	0	Correct
M11	Monolingual	194	232	fuff	fif	Mismatching	0.99	Similar	Different	0	Correct
M11	Monolingual	195	75	deek	deek	Matching	1	Similar	Same	1	Correct
M11	Monolingual	196	233	fuf	fuff	Mismatching	0.01	Dissimilar	Same	1	Incorrect
M11	Monolingual	197	76	barp	barp	Matching	1	Similar	Same	1	Correct
M11	Monolingual	198	234	dook	dake	Mismatching	0.01	Dissimilar	Different	0	Correct
M11	Monolingual	199	235	bawp	barp	Mismatching	1	Similar	Different	0	Correct
M11	Monolingual	200	236	fuf	faf	Mismatching	0.47	Dissimilar	Same	1	Incorrect
M11	Monolingual	201	77	bawp	bawp	Matching	1	Similar	Same	1	Correct
M11	Monolingual	202	78	bowp	bowp	Matching	0.11	Dissimilar	Same	1	Correct
M11	Monolingual	203	237	fuf	faf	Mismatching	0.47	Dissimilar	Same	1	Incorrect
M11	Monolingual	204	238	bipe	bawp	Mismatching	1	Similar	Different	0	Correct
M11	Monolingual	205	79	bope	bope	Matching	0.64	Similar	Same	1	Correct
M11	Monolingual	206	80	faf	faf	Matching	0.85	Similar	Same	1	Correct
M11	Monolingual	207	81	durk	durk	Matching	0.97	Similar	Same	1	Correct
M11	Monolingual	208	239	dook	deek	Mismatching	1	Similar	Different	0	Correct
M11	Monolingual	209	82	bipe	bipe	Matching	1	Similar	Same	1	Correct
M11	Monolingual	210	83	fif	fif	Matching	0.99	Similar	Same	1	Correct
M11	Monolingual	211	84	dake	dake	Matching	0.25	Dissimilar	Same	1	Correct
M11	Monolingual	212	240	fif	fuff	Mismatching	1	Similar	Different	0	Correct
M11	Monolingual	213	241	dake	durk	Mismatching	0.95	Similar	Different	0	Correct
M11	Monolingual	214	242	faf	fuf	Mismatching	0.01	Dissimilar	Different	0	Correct
M11	Monolingual	215	243	fuf	faf	Mismatching	0	Dissimilar	Different	0	Correct
M11	Monolingual	216	244	faf	fif	Mismatching	1	Similar	Different	0	Correct
M11	Monolingual	217	85	bowp	bowp	Matching	0.21	Dissimilar	Same	1	Correct
M11	Monolingual	218	245	dake	durk	Mismatching	0.25	Dissimilar	Different	0	Correct
M11	Monolingual	219	246	fuff	faf	Mismatching	0.85	Similar	Different	0	Correct
M11	Monolingual	220	86	bowp	bowp	Matching	0.21	Dissimilar	Same	1	Correct
M11	Monolingual	221	247	durk	deek	Mismatching	0.95	Similar	Different	0	Correct
M11	Monolingual	222	248	bowp	bope	Mismatching	0.01	Dissimilar	Different	0	Correct
M11	Monolingual	223	87	fof	fof	Matching	0	Dissimilar	Same	1	Correct
M11	Monolingual	224	249	bawp	bowp	Mismatching	0.92	Similar	Same	1	Incorrect
M11	Monolingual	225	88	fuff	fuff	Matching	0.95	Similar	Same	1	Correct
M11	Monolingual	226	89	bawp	bawp	Matching	1	Similar	Same	1	Correct
M11	Monolingual	227	250	fof	fuf	Mismatching	0.01	Dissimilar	Same	1	Incorrect
M11	Monolingual	228	251	barp	bope	Mismatching	0.64	Similar	Different	0	Correct
M11	Monolingual	229	90	barp	barp	Matching	0.63	Similar	Same	1	Correct
M11	Monolingual	230	91	fif	fif	Matching	1	Similar	Same	1	Correct
M11	Monolingual	231	252	dook	dake	Mismatching	0.01	Dissimilar	Different	0	Correct
M11	Monolingual	232	253	fuf	fof	Mismatching	0.01	Dissimilar	Same	1	Incorrect
M11	Monolingual	233	254	bope	bawp	Mismatching	0.64	Similar	Different	0	Correct
M11	Monolingual	234	255	fuf	faf	Mismatching	0	Dissimilar	Different	0	Correct
M11	Monolingual	235	256	bipe	barp	Mismatching	0.63	Similar	Different	0	Correct
M11	Monolingual	236	92	dake	dake	Matching	0.88	Similar	Same	1	Correct
M11	Monolingual	237	93	bawp	bawp	Matching	1	Similar	Same	1	Correct
M11	Monolingual	238	94	bowp	bowp	Matching	0.11	Dissimilar	Same	1	Correct
M11	Monolingual	239	257	fuff	fof	Mismatching	0.95	Similar	Same	1	Incorrect
M11	Monolingual	240	258	bawp	bope	Mismatching	1	Similar	Same	1	Incorrect
M11	Monolingual	241	259	bope	bipe	Mismatching	0.99	Similar	Different	0	Correct
M11	Monolingual	242	95	faf	faf	Matching	0.47	Dissimilar	Same	1	Correct
M11	Monolingual	243	260	dook	durk	Mismatching	0.01	Dissimilar	Different	0	Correct
M11	Monolingual	244	261	dake	dook	Mismatching	0.88	Similar	Different	0	Correct
M11	Monolingual	245	262	fif	faf	Mismatching	0.47	Dissimilar	Different	0	Correct
M11	Monolingual	246	263	fif	fof	Mismatching	0	Dissimilar	Different	0	Correct
M11	Monolingual	247	264	dook	deek	Mismatching	1	Similar	Different	0	Correct
M11	Monolingual	248	265	bowp	bawp	Mismatching	0.11	Dissimilar	Different	0	Correct
M11	Monolingual	249	266	fof	fuf	Mismatching	0.01	Dissimilar	Same	1	Incorrect
M11	Monolingual	250	267	deek	dook	Mismatching	0.01	Dissimilar	Different	0	Correct
M11	Monolingual	251	268	faf	fuf	Mismatching	0.47	Dissimilar	Same	1	Incorrect
M11	Monolingual	252	269	bawp	bowp	Mismatching	0.11	Dissimilar	Same	1	Incorrect
M11	Monolingual	253	270	durk	dook	Mismatching	0.95	Similar	Different	0	Correct
M11	Monolingual	254	271	fof	faf	Mismatching	0.85	Similar	Different	0	Correct
M11	Monolingual	255	272	durk	deek	Mismatching	1	Similar	Different	0	Correct
M11	Monolingual	256	96	fuf	fuf	Matching	0	Dissimilar	Different	0	Incorrect
M11	Monolingual	257	97	bipe	bipe	Matching	1	Similar	Same	1	Correct
M11	Monolingual	258	273	bawp	bope	Mismatching	0.01	Dissimilar	Same	1	Incorrect
M11	Monolingual	259	98	fof	fof	Matching	0.01	Dissimilar	Same	1	Correct
M11	Monolingual	260	274	barp	bawp	Mismatching	0.92	Similar	Different	0	Correct
M11	Monolingual	261	275	bipe	barp	Mismatching	0.99	Similar	Different	0	Correct
M11	Monolingual	262	99	fuf	fuf	Matching	0	Dissimilar	Different	0	Incorrect
M11	Monolingual	263	276	deek	dake	Mismatching	1	Similar	Different	0	Correct
M11	Monolingual	264	100	bipe	bipe	Matching	1	Similar	Same	1	Correct
M11	Monolingual	265	277	bope	bowp	Mismatching	0.11	Dissimilar	Different	0	Correct
M11	Monolingual	266	278	faf	fof	Mismatching	0.47	Dissimilar	Different	0	Correct
M11	Monolingual	267	101	bowp	bowp	Matching	0.11	Dissimilar	Same	1	Correct
M11	Monolingual	268	102	dake	dake	Matching	0.88	Similar	Same	1	Correct
M11	Monolingual	269	279	fif	fof	Mismatching	0.99	Similar	Different	0	Correct
M11	Monolingual	270	280	bipe	barp	Mismatching	0.99	Similar	Different	0	Correct
M11	Monolingual	271	103	dook	dook	Matching	0.01	Dissimilar	Same	1	Correct
M11	Monolingual	272	104	durk	durk	Matching	0.95	Similar	Same	1	Correct
M11	Monolingual	273	281	bope	barp	Mismatching	0.01	Dissimilar	Different	0	Correct
M11	Monolingual	274	282	deek	dook	Mismatching	1	Similar	Different	0	Correct
M11	Monolingual	275	283	barp	bawp	Mismatching	0.63	Similar	Different	0	Correct
M11	Monolingual	276	105	dook	dook	Matching	0.02	Dissimilar	Same	1	Correct
M11	Monolingual	277	284	bowp	bipe	Mismatching	0.99	Similar	Different	0	Correct
M11	Monolingual	278	106	faf	faf	Matching	0.85	Similar	Same	1	Correct
M11	Monolingual	279	285	fof	fuf	Mismatching	0.01	Dissimilar	Same	1	Incorrect
M11	Monolingual	280	286	fif	fof	Mismatching	0.99	Similar	Different	0	Correct
M11	Monolingual	281	287	bope	bipe	Mismatching	0.64	Similar	Different	0	Correct
M11	Monolingual	282	288	fof	fuff	Mismatching	0.9	Similar	Same	1	Incorrect
M11	Monolingual	283	289	bowp	bawp	Mismatching	1	Similar	Different	0	Correct
M11	Monolingual	284	290	fuff	fif	Mismatching	1	Similar	Different	0	Correct
M11	Monolingual	285	107	fuf	fuf	Matching	0.01	Dissimilar	Different	0	Incorrect
M11	Monolingual	286	291	dake	deek	Mismatching	1	Similar	Different	0	Correct
M11	Monolingual	287	292	dook	deek	Mismatching	0.02	Dissimilar	Different	0	Correct
M11	Monolingual	288	293	fof	fif	Mismatching	0.99	Similar	Different	0	Correct
M11	Monolingual	289	294	bowp	barp	Mismatching	0.63	Similar	Different	0	Correct
M11	Monolingual	290	295	deek	dake	Mismatching	0.88	Similar	Different	0	Correct
M11	Monolingual	291	296	barp	bowp	Mismatching	0.63	Similar	Different	0	Correct
M11	Monolingual	292	297	faf	fif	Mismatching	0.85	Similar	Different	0	Correct
M11	Monolingual	293	108	durk	durk	Matching	0.95	Similar	Same	1	Correct
M11	Monolingual	294	109	fif	fif	Matching	0.99	Similar	Same	1	Correct
M11	Monolingual	295	298	bawp	bope	Mismatching	1	Similar	Same	1	Incorrect
M11	Monolingual	296	299	dake	durk	Mismatching	0.97	Similar	Different	0	Correct
M11	Monolingual	297	300	barp	bope	Mismatching	1	Similar	Different	0	Correct
M11	Monolingual	298	301	bope	bawp	Mismatching	0.92	Similar	Same	1	Incorrect
M11	Monolingual	299	110	barp	barp	Matching	1	Similar	Same	1	Correct
M11	Monolingual	300	302	barp	bipe	Mismatching	0.63	Similar	Different	0	Correct
M11	Monolingual	301	303	durk	deek	Mismatching	1	Similar	Different	0	Correct
M11	Monolingual	302	304	fuff	fuf	Mismatching	0.9	Similar	Different	0	Correct
M11	Monolingual	303	305	bipe	bowp	Mismatching	0.21	Dissimilar	Different	0	Correct
M11	Monolingual	304	306	fif	faf	Mismatching	0.99	Similar	Different	0	Correct
M11	Monolingual	305	307	fif	faf	Mismatching	0.47	Dissimilar	Different	0	Correct
M11	Monolingual	306	308	bope	bowp	Mismatching	0.64	Similar	Different	0	Correct
M11	Monolingual	307	309	bipe	bawp	Mismatching	1	Similar	Different	0	Correct
M11	Monolingual	308	111	bope	bope	Matching	0.01	Dissimilar	Same	1	Correct
M11	Monolingual	309	310	faf	fuff	Mismatching	0.85	Similar	Different	0	Correct
M11	Monolingual	310	311	fuff	fuf	Mismatching	0.9	Similar	Same	1	Incorrect
M11	Monolingual	311	312	fuf	fuff	Mismatching	0.95	Similar	Same	1	Incorrect
M11	Monolingual	312	313	fuf	fif	Mismatching	1	Similar	Different	0	Correct
M11	Monolingual	313	314	fof	fuff	Mismatching	0	Dissimilar	Same	1	Incorrect
M11	Monolingual	314	112	fuff	fuff	Matching	0.9	Similar	Same	1	Correct
M11	Monolingual	315	315	bipe	bope	Mismatching	0.99	Similar	Different	0	Correct
M11	Monolingual	316	316	bowp	bope	Mismatching	0.21	Dissimilar	Different	0	Correct
M11	Monolingual	317	317	bowp	barp	Mismatching	0.21	Dissimilar	Different	0	Correct
M11	Monolingual	318	318	bowp	bipe	Mismatching	0.21	Dissimilar	Different	0	Correct
M11	Monolingual	319	319	bipe	bowp	Mismatching	1	Similar	Different	0	Correct
M11	Monolingual	320	320	fof	fuff	Mismatching	0.9	Similar	Same	1	Incorrect
M12	Monolingual	1	134	dook	durk	Mismatching	0.95	Similar	Different	0	Correct
M12	Monolingual	2	214	deek	dook	Mismatching	0.01	Dissimilar	Different	0	Correct
M12	Monolingual	3	40	deek	deek	Matching	1	Similar	Same	1	Correct
M12	Monolingual	4	39	deek	deek	Matching	1	Similar	Same	1	Correct
M12	Monolingual	5	309	bipe	bawp	Mismatching	1	Similar	Different	0	Correct
M12	Monolingual	6	20	dook	dook	Matching	0.02	Dissimilar	Different	0	Incorrect
M12	Monolingual	7	317	bowp	barp	Mismatching	0.21	Dissimilar	Same	1	Incorrect
M12	Monolingual	8	197	fuf	fof	Mismatching	0.01	Dissimilar	Same	1	Incorrect
M12	Monolingual	9	141	faf	fif	Mismatching	0.85	Similar	Different	0	Correct
M12	Monolingual	10	76	barp	barp	Matching	1	Similar	Same	1	Correct
M12	Monolingual	11	208	faf	fuf	Mismatching	0.85	Similar	Same	1	Incorrect
M12	Monolingual	12	245	dake	durk	Mismatching	0.25	Dissimilar	Different	0	Correct
M12	Monolingual	13	167	barp	bawp	Mismatching	0.92	Similar	Same	1	Incorrect
M12	Monolingual	14	133	bipe	bawp	Mismatching	1	Similar	Same	1	Incorrect
M12	Monolingual	15	80	faf	faf	Matching	0.85	Similar	Same	1	Correct
M12	Monolingual	16	286	fif	fof	Mismatching	0.99	Similar	Different	0	Correct
M12	Monolingual	17	147	fif	fof	Mismatching	0	Dissimilar	Same	1	Incorrect
M12	Monolingual	18	120	bope	bowp	Mismatching	0.11	Dissimilar	Different	0	Correct
M12	Monolingual	19	74	fif	fif	Matching	0.99	Similar	Different	0	Incorrect
M12	Monolingual	20	31	dake	dake	Matching	0.88	Similar	Same	1	Correct
M12	Monolingual	21	115	fuff	fof	Mismatching	0.01	Dissimilar	Different	0	Correct
M12	Monolingual	22	121	faf	fuff	Mismatching	0.95	Similar	Different	0	Correct
M12	Monolingual	23	246	fuff	faf	Mismatching	0.85	Similar	Different	0	Correct
M12	Monolingual	24	95	faf	faf	Matching	0.47	Dissimilar	Same	1	Correct
M12	Monolingual	25	209	dook	dake	Mismatching	0.25	Dissimilar	Different	0	Correct
M12	Monolingual	26	257	fuff	fof	Mismatching	0.95	Similar	Same	1	Incorrect
M12	Monolingual	27	46	bope	bope	Matching	0.64	Similar	Same	1	Correct
M12	Monolingual	28	281	bope	barp	Mismatching	0.01	Dissimilar	Different	0	Correct
M12	Monolingual	29	300	barp	bope	Mismatching	1	Similar	Different	0	Correct
M12	Monolingual	30	30	dook	dook	Matching	0.02	Dissimilar	Same	1	Correct
M12	Monolingual	31	205	fuf	fof	Mismatching	0.01	Dissimilar	Same	1	Incorrect
M12	Monolingual	32	146	barp	bope	Mismatching	0.63	Similar	Different	0	Correct
M12	Monolingual	33	284	bowp	bipe	Mismatching	0.99	Similar	Different	0	Correct
M12	Monolingual	34	234	dook	dake	Mismatching	0.01	Dissimilar	Different	0	Correct
M12	Monolingual	35	243	fuf	faf	Mismatching	0	Dissimilar	Different	0	Correct
M12	Monolingual	36	199	durk	deek	Mismatching	0.95	Similar	Different	0	Correct
M12	Monolingual	37	59	fuf	fuf	Matching	0	Dissimilar	Same	1	Correct
M12	Monolingual	38	177	dake	deek	Mismatching	0.88	Similar	Same	1	Incorrect
M12	Monolingual	39	102	dake	dake	Matching	0.88	Similar	Same	1	Correct
M12	Monolingual	40	36	fuf	fuf	Matching	0.01	Dissimilar	Different	0	Incorrect
M12	Monolingual	41	195	bowp	bawp	Mismatching	0.92	Similar	Same	1	Incorrect
M12	Monolingual	42	263	fif	fof	Mismatching	0	Dissimilar	Different	0	Correct
M12	Monolingual	43	130	fuff	fuf	Mismatching	0	Dissimilar	Same	1	Incorrect
M12	Monolingual	44	159	fif	fuf	Mismatching	0.99	Similar	Different	0	Correct
M12	Monolingual	45	126	dake	dook	Mismatching	0.02	Dissimilar	Different	0	Correct
M12	Monolingual	46	216	barp	bipe	Mismatching	0.99	Similar	Different	0	Correct
M12	Monolingual	47	204	bawp	bipe	Mismatching	1	Similar	Different	0	Correct
M12	Monolingual	48	285	fof	fuf	Mismatching	0.01	Dissimilar	Same	1	Incorrect
M12	Monolingual	49	8	faf	faf	Matching	0.47	Dissimilar	Same	1	Correct
M12	Monolingual	50	163	fuff	faf	Mismatching	0.47	Dissimilar	Different	0	Correct
M12	Monolingual	51	84	dake	dake	Matching	0.25	Dissimilar	Same	1	Correct
M12	Monolingual	52	288	fof	fuff	Mismatching	0.9	Similar	Same	1	Incorrect
M12	Monolingual	53	6	fif	fif	Matching	1	Similar	Same	1	Correct
M12	Monolingual	54	3	dake	dake	Matching	0.25	Dissimilar	Same	1	Correct
M12	Monolingual	55	173	bipe	bowp	Mismatching	0.21	Dissimilar	Different	0	Correct
M12	Monolingual	56	151	dook	dake	Mismatching	0.25	Dissimilar	Different	0	Correct
M12	Monolingual	57	175	durk	dake	Mismatching	0.88	Similar	Different	0	Correct
M12	Monolingual	58	105	dook	dook	Matching	0.02	Dissimilar	Same	1	Correct
M12	Monolingual	59	290	fuff	fif	Mismatching	1	Similar	Different	0	Correct
M12	Monolingual	60	255	fuf	faf	Mismatching	0	Dissimilar	Different	0	Correct
M12	Monolingual	61	258	bawp	bope	Mismatching	1	Similar	Different	0	Correct
M12	Monolingual	62	225	dake	deek	Mismatching	1	Similar	Different	0	Correct
M12	Monolingual	63	213	deek	durk	Mismatching	0.97	Similar	Different	0	Correct
M12	Monolingual	64	99	fuf	fuf	Matching	0	Dissimilar	Same	1	Correct
M12	Monolingual	65	305	bipe	bowp	Mismatching	0.21	Dissimilar	Different	0	Correct
M12	Monolingual	66	169	fuff	fif	Mismatching	0.95	Similar	Different	0	Correct
M12	Monolingual	67	304	fuff	fuf	Mismatching	0.9	Similar	Same	1	Incorrect
M12	Monolingual	68	129	barp	bipe	Mismatching	1	Similar	Different	0	Correct
M12	Monolingual	69	124	durk	dook	Mismatching	0.97	Similar	Different	0	Correct
M12	Monolingual	70	219	barp	bawp	Mismatching	0.63	Similar	Different	0	Correct
M12	Monolingual	71	210	bope	bawp	Mismatching	0.64	Similar	Different	0	Correct
M12	Monolingual	72	296	barp	bowp	Mismatching	0.63	Similar	Different	0	Correct
M12	Monolingual	73	123	fuf	fif	Mismatching	0.01	Dissimilar	Different	0	Correct
M12	Monolingual	74	303	durk	deek	Mismatching	1	Similar	Same	1	Incorrect
M12	Monolingual	75	292	dook	deek	Mismatching	0.02	Dissimilar	Different	0	Correct
M12	Monolingual	76	186	bawp	barp	Mismatching	1	Similar	Different	0	Correct
M12	Monolingual	77	157	fof	fif	Mismatching	0.99	Similar	Different	0	Correct
M12	Monolingual	78	291	dake	deek	Mismatching	1	Similar	Same	1	Incorrect
M12	Monolingual	79	282	deek	dook	Mismatching	1	Similar	Different	0	Correct
M12	Monolingual	80	180	fif	faf	Mismatching	0.99	Similar	Different	0	Correct
M12	Monolingual	81	23	durk	durk	Matching	0.97	Similar	Same	1	Correct
M12	Monolingual	82	271	fof	faf	Mismatching	0.85	Similar	Same	1	Incorrect
M12	Monolingual	83	86	bowp	bowp	Matching	0.21	Dissimilar	Different	0	Incorrect
M12	Monolingual	84	158	fof	faf	Mismatching	0.85	Similar	Different	0	Correct
M12	Monolingual	85	254	bope	bawp	Mismatching	0.64	Similar	Same	1	Incorrect
M12	Monolingual	86	194	barp	bipe	Mismatching	1	Similar	Different	0	Correct
M12	Monolingual	87	41	faf	faf	Matching	0.85	Similar	Same	1	Correct
M12	Monolingual	88	135	faf	fof	Mismatching	0.01	Dissimilar	Different	0	Correct
M12	Monolingual	89	13	barp	barp	Matching	0.63	Similar	Same	1	Correct
M12	Monolingual	90	262	fif	faf	Mismatching	0.47	Dissimilar	Different	0	Correct
M12	Monolingual	91	179	faf	fof	Mismatching	0	Dissimilar	Different	0	Correct
M12	Monolingual	92	287	bope	bipe	Mismatching	0.64	Similar	Different	0	Correct
M12	Monolingual	93	150	dake	durk	Mismatching	0.88	Similar	Same	1	Incorrect
M12	Monolingual	94	145	faf	fif	Mismatching	1	Similar	Different	0	Correct
M12	Monolingual	95	250	fof	fuf	Mismatching	0.01	Dissimilar	Different	0	Correct
M12	Monolingual	96	220	bowp	bope	Mismatching	0.01	Dissimilar	Same	1	Incorrect
M12	Monolingual	97	181	bawp	bipe	Mismatching	1	Similar	Different	0	Correct
M12	Monolingual	98	78	bowp	bowp	Matching	0.11	Dissimilar	Same	1	Correct
M12	Monolingual	99	260	dook	durk	Mismatching	0.01	Dissimilar	Different	0	Correct
M12	Monolingual	100	269	bawp	bowp	Mismatching	0.11	Dissimilar	Different	0	Correct
M12	Monolingual	101	182	bipe	barp	Mismatching	0.63	Similar	Different	0	Correct
M12	Monolingual	102	103	dook	dook	Matching	0.01	Dissimilar	Same	1	Correct
M12	Monolingual	103	1	deek	deek	Matching	1	Similar	Same	1	Correct
M12	Monolingual	104	16	fof	fof	Matching	0.01	Dissimilar	Same	1	Correct
M12	Monolingual	105	277	bope	bowp	Mismatching	0.11	Dissimilar	Different	0	Correct
M12	Monolingual	106	227	fif	fuff	Mismatching	0.95	Similar	Different	0	Correct
M12	Monolingual	107	222	deek	dake	Mismatching	0.88	Similar	Same	1	Incorrect
M12	Monolingual	108	161	bope	barp	Mismatching	1	Similar	Different	0	Correct
M12	Monolingual	109	184	barp	bowp	Mismatching	0.21	Dissimilar	Same	1	Incorrect
M12	Monolingual	110	28	bipe	bipe	Matching	0.99	Similar	Same	1	Correct
M12	Monolingual	111	187	fif	fuf	Mismatching	0.99	Similar	Different	0	Correct
M12	Monolingual	112	89	bawp	bawp	Matching	1	Similar	Same	1	Correct
M12	Monolingual	113	12	fif	fif	Matching	0.99	Similar	Same	1	Correct
M12	Monolingual	114	24	bawp	bawp	Matching	0.92	Similar	Same	1	Correct
M12	Monolingual	115	178	bowp	bipe	Mismatching	1	Similar	Different	0	Correct
M12	Monolingual	116	168	bipe	bope	Mismatching	0.64	Similar	Different	0	Correct
M12	Monolingual	117	267	deek	dook	Mismatching	0.01	Dissimilar	Same	1	Incorrect
M12	Monolingual	118	19	dake	dake	Matching	0.25	Dissimilar	Same	1	Correct
M12	Monolingual	119	17	bope	bope	Matching	0.01	Dissimilar	Same	1	Correct
M12	Monolingual	120	283	barp	bawp	Mismatching	0.63	Similar	Different	0	Correct
M12	Monolingual	121	93	bawp	bawp	Matching	1	Similar	Same	1	Correct
M12	Monolingual	122	217	deek	durk	Mismatching	1	Similar	Different	0	Correct
M12	Monolingual	123	66	fif	fif	Matching	1	Similar	Same	1	Correct
M12	Monolingual	124	70	bawp	bawp	Matching	0.92	Similar	Different	0	Incorrect
M12	Monolingual	125	211	fuff	faf	Mismatching	0.9	Similar	Same	1	Incorrect
M12	Monolingual	126	270	durk	dook	Mismatching	0.95	Similar	Different	0	Correct
M12	Monolingual	127	109	fif	fif	Matching	0.99	Similar	Same	1	Correct
M12	Monolingual	128	289	bowp	bawp	Mismatching	1	Similar	Same	1	Incorrect
M12	Monolingual	129	26	faf	faf	Matching	0.47	Dissimilar	Same	1	Correct
M12	Monolingual	130	238	bipe	bawp	Mismatching	1	Similar	Different	0	Correct
M12	Monolingual	131	160	bawp	bowp	Mismatching	0.92	Similar	Different	0	Correct
M12	Monolingual	132	316	bowp	bope	Mismatching	0.21	Dissimilar	Different	0	Correct
M12	Monolingual	133	14	bipe	bipe	Matching	0.99	Similar	Different	0	Incorrect
M12	Monolingual	134	249	bawp	bowp	Mismatching	0.92	Similar	Different	0	Correct
M12	Monolingual	135	107	fuf	fuf	Matching	0.01	Dissimilar	Same	1	Correct
M12	Monolingual	136	202	fuf	fuff	Mismatching	0.95	Similar	Same	1	Incorrect
M12	Monolingual	137	98	fof	fof	Matching	0.01	Dissimilar	Same	1	Correct
M12	Monolingual	138	154	bope	bowp	Mismatching	0.64	Similar	Different	0	Correct
M12	Monolingual	139	108	durk	durk	Matching	0.95	Similar	Same	1	Correct
M12	Monolingual	140	57	bope	bope	Matching	0.01	Dissimilar	Same	1	Correct
M12	Monolingual	141	252	dook	dake	Mismatching	0.01	Dissimilar	Different	0	Correct
M12	Monolingual	142	230	barp	bope	Mismatching	0.01	Dissimilar	Different	0	Correct
M12	Monolingual	143	297	faf	fif	Mismatching	0.85	Similar	Same	1	Incorrect
M12	Monolingual	144	63	fof	fof	Matching	0.01	Dissimilar	Same	1	Correct
M12	Monolingual	145	215	faf	fof	Mismatching	0.85	Similar	Different	0	Correct
M12	Monolingual	146	306	fif	faf	Mismatching	0.99	Similar	Different	0	Correct
M12	Monolingual	147	116	bowp	barp	Mismatching	0.11	Dissimilar	Same	1	Incorrect
M12	Monolingual	148	226	barp	bowp	Mismatching	1	Similar	Different	0	Correct
M12	Monolingual	149	279	fif	fof	Mismatching	0.99	Similar	Different	0	Correct
M12	Monolingual	150	239	dook	deek	Mismatching	1	Similar	Different	0	Correct
M12	Monolingual	151	100	bipe	bipe	Matching	1	Similar	Same	1	Correct
M12	Monolingual	152	79	bope	bope	Matching	0.64	Similar	Same	1	Correct
M12	Monolingual	153	228	deek	dook	Mismatching	1	Similar	Different	0	Correct
M12	Monolingual	154	312	fuf	fuff	Mismatching	0.95	Similar	Same	1	Incorrect
M12	Monolingual	155	242	faf	fuf	Mismatching	0.01	Dissimilar	Different	0	Correct
M12	Monolingual	156	106	faf	faf	Matching	0.85	Similar	Same	1	Correct
M12	Monolingual	157	294	bowp	barp	Mismatching	0.63	Similar	Different	0	Correct
M12	Monolingual	158	203	bowp	bope	Mismatching	0.21	Dissimilar	Different	0	Correct
M12	Monolingual	159	318	bowp	bipe	Mismatching	0.21	Dissimilar	Same	1	Incorrect
M12	Monolingual	160	241	dake	durk	Mismatching	0.95	Similar	Different	0	Correct
M12	Monolingual	161	244	faf	fif	Mismatching	1	Similar	Different	0	Correct
M12	Monolingual	162	2	fof	fof	Matching	0	Dissimilar	Same	1	Correct
M12	Monolingual	163	96	fuf	fuf	Matching	0	Dissimilar	Different	0	Incorrect
M12	Monolingual	164	97	bipe	bipe	Matching	1	Similar	Same	1	Correct
M12	Monolingual	165	191	bawp	barp	Mismatching	1	Similar	Different	0	Correct
M12	Monolingual	166	131	bope	barp	Mismatching	0.01	Dissimilar	Different	0	Correct
M12	Monolingual	167	91	fif	fif	Matching	1	Similar	Same	1	Correct
M12	Monolingual	168	87	fof	fof	Matching	0	Dissimilar	Same	1	Correct
M12	Monolingual	169	172	fuf	fif	Mismatching	1	Similar	Different	0	Correct
M12	Monolingual	170	65	dook	dook	Matching	0.01	Dissimilar	Same	1	Correct
M12	Monolingual	171	190	durk	dake	Mismatching	0.25	Dissimilar	Different	0	Correct
M12	Monolingual	172	71	fuff	fuff	Matching	0.95	Similar	Same	1	Correct
M12	Monolingual	173	233	fuf	fuff	Mismatching	0.01	Dissimilar	Same	1	Incorrect
M12	Monolingual	174	101	bowp	bowp	Matching	0.11	Dissimilar	Same	1	Correct
M12	Monolingual	175	67	fuff	fuff	Matching	0.95	Similar	Same	1	Correct
M12	Monolingual	176	10	fuff	fuff	Matching	0.9	Similar	Same	1	Correct
M12	Monolingual	177	143	fuff	faf	Mismatching	0.95	Similar	Different	0	Correct
M12	Monolingual	178	144	fif	fuf	Mismatching	0	Dissimilar	Different	0	Correct
M12	Monolingual	179	104	durk	durk	Matching	0.95	Similar	Same	1	Correct
M12	Monolingual	180	138	deek	durk	Mismatching	1	Similar	Different	0	Correct
M12	Monolingual	181	110	barp	barp	Matching	1	Similar	Different	0	Incorrect
M12	Monolingual	182	34	fuf	fuf	Matching	0	Dissimilar	Same	1	Correct
M12	Monolingual	183	311	fuff	fuf	Mismatching	0.9	Similar	Different	0	Correct
M12	Monolingual	184	293	fof	fif	Mismatching	0.99	Similar	Different	0	Correct
M12	Monolingual	185	196	bipe	bowp	Mismatching	1	Similar	Different	0	Correct
M12	Monolingual	186	295	deek	dake	Mismatching	0.88	Similar	Same	1	Incorrect
M12	Monolingual	187	128	fuff	fuf	Mismatching	0	Dissimilar	Same	1	Incorrect
M12	Monolingual	188	251	barp	bope	Mismatching	0.64	Similar	Different	0	Correct
M12	Monolingual	189	52	bowp	bowp	Matching	0.21	Dissimilar	Same	1	Correct
M12	Monolingual	190	83	fif	fif	Matching	0.99	Similar	Same	1	Correct
M12	Monolingual	191	272	durk	deek	Mismatching	1	Similar	Different	0	Correct
M12	Monolingual	192	302	barp	bipe	Mismatching	0.63	Similar	Same	1	Incorrect
M12	Monolingual	193	232	fuff	fif	Mismatching	0.99	Similar	Same	1	Incorrect
M12	Monolingual	194	314	fof	fuff	Mismatching	0	Dissimilar	Different	0	Correct
M12	Monolingual	195	176	faf	fuff	Mismatching	0.9	Similar	Different	0	Correct
M12	Monolingual	196	261	dake	dook	Mismatching	0.88	Similar	Different	0	Correct
M12	Monolingual	197	315	bipe	bope	Mismatching	0.99	Similar	Different	0	Correct
M12	Monolingual	198	114	durk	dake	Mismatching	0.97	Similar	Different	0	Correct
M12	Monolingual	199	117	deek	dake	Mismatching	1	Similar	Same	1	Incorrect
M12	Monolingual	200	72	deek	deek	Matching	1	Similar	Same	1	Correct
M12	Monolingual	201	265	bowp	bawp	Mismatching	0.11	Dissimilar	Different	0	Correct
M12	Monolingual	202	307	fif	faf	Mismatching	0.47	Dissimilar	Same	1	Incorrect
M12	Monolingual	203	155	bawp	bowp	Mismatching	0.11	Dissimilar	Different	0	Correct
M12	Monolingual	204	278	faf	fof	Mismatching	0.47	Dissimilar	Different	0	Correct
M12	Monolingual	205	268	faf	fuf	Mismatching	0.47	Dissimilar	Same	1	Incorrect
M12	Monolingual	206	174	bipe	bawp	Mismatching	1	Similar	Different	0	Correct
M12	Monolingual	207	320	fof	fuff	Mismatching	0.9	Similar	Same	1	Incorrect
M12	Monolingual	208	125	bope	bawp	Mismatching	0.92	Similar	Different	0	Correct
M12	Monolingual	209	50	deek	deek	Matching	1	Similar	Different	0	Incorrect
M12	Monolingual	210	310	faf	fuff	Mismatching	0.85	Similar	Different	0	Correct
M12	Monolingual	211	75	deek	deek	Matching	1	Similar	Same	1	Correct
M12	Monolingual	212	218	fof	fif	Mismatching	0	Dissimilar	Different	0	Correct
M12	Monolingual	213	188	fuff	fif	Mismatching	0.9	Similar	Different	0	Correct
M12	Monolingual	214	62	faf	faf	Matching	0.47	Dissimilar	Same	1	Correct
M12	Monolingual	215	56	fof	fof	Matching	0	Dissimilar	Same	1	Correct
M12	Monolingual	216	136	durk	dake	Mismatching	0.95	Similar	Different	0	Correct
M12	Monolingual	217	25	bipe	bipe	Matching	1	Similar	Same	1	Correct
M12	Monolingual	218	7	bawp	bawp	Matching	1	Similar	Same	1	Correct
M12	Monolingual	219	319	bipe	bowp	Mismatching	1	Similar	Different	0	Correct
M12	Monolingual	220	119	fof	fif	Mismatching	0	Dissimilar	Different	0	Correct
M12	Monolingual	221	229	barp	bowp	Mismatching	0.11	Dissimilar	Different	0	Correct
M12	Monolingual	222	149	bipe	bope	Mismatching	0.99	Similar	Different	0	Correct
M12	Monolingual	223	35	fuff	fuff	Matching	0.95	Similar	Same	1	Correct
M12	Monolingual	224	236	fuf	faf	Mismatching	0.47	Dissimilar	Same	1	Incorrect
M12	Monolingual	225	112	fuff	fuff	Matching	0.9	Similar	Same	1	Correct
M12	Monolingual	226	240	fif	fuff	Mismatching	1	Similar	Different	0	Correct
M12	Monolingual	227	231	fuf	fif	Mismatching	0.01	Dissimilar	Different	0	Correct
M12	Monolingual	228	85	bowp	bowp	Matching	0.21	Dissimilar	Same	1	Correct
M12	Monolingual	229	37	fuf	fuf	Matching	0.01	Dissimilar	Different	0	Incorrect
M12	Monolingual	230	32	bowp	bowp	Matching	0.11	Dissimilar	Same	1	Correct
M12	Monolingual	231	237	fuf	faf	Mismatching	0.47	Dissimilar	Same	1	Incorrect
M12	Monolingual	232	33	dake	dake	Matching	0.25	Dissimilar	Same	1	Correct
M12	Monolingual	233	118	durk	dook	Mismatching	0.02	Dissimilar	Different	0	Correct
M12	Monolingual	234	148	fuff	fof	Mismatching	0	Dissimilar	Different	0	Correct
M12	Monolingual	235	247	durk	deek	Mismatching	0.95	Similar	Different	0	Correct
M12	Monolingual	236	51	deek	deek	Matching	1	Similar	Same	1	Correct
M12	Monolingual	237	156	bope	barp	Mismatching	1	Similar	Different	0	Correct
M12	Monolingual	238	5	fof	fof	Matching	0.01	Dissimilar	Same	1	Correct
M12	Monolingual	239	29	dook	dook	Matching	0.02	Dissimilar	Different	0	Incorrect
M12	Monolingual	240	82	bipe	bipe	Matching	1	Similar	Same	1	Correct
M12	Monolingual	241	201	bowp	barp	Mismatching	1	Similar	Different	0	Correct
M12	Monolingual	242	256	bipe	barp	Mismatching	0.63	Similar	Same	1	Incorrect
M12	Monolingual	243	152	dake	dook	Mismatching	0.88	Similar	Different	0	Correct
M12	Monolingual	244	313	fuf	fif	Mismatching	1	Similar	Different	0	Correct
M12	Monolingual	245	18	barp	barp	Matching	0.63	Similar	Same	1	Correct
M12	Monolingual	246	275	bipe	barp	Mismatching	0.99	Similar	Same	1	Incorrect
M12	Monolingual	247	273	bawp	bope	Mismatching	0.01	Dissimilar	Different	0	Correct
M12	Monolingual	248	192	bowp	bipe	Mismatching	0.11	Dissimilar	Different	0	Correct
M12	Monolingual	249	68	durk	durk	Matching	0.95	Similar	Same	1	Correct
M12	Monolingual	250	259	bope	bipe	Mismatching	0.99	Similar	Different	0	Correct
M12	Monolingual	251	308	bope	bowp	Mismatching	0.64	Similar	Different	0	Correct
M12	Monolingual	252	153	bawp	barp	Mismatching	1	Similar	Same	1	Incorrect
M12	Monolingual	253	200	faf	fuf	Mismatching	0	Dissimilar	Different	0	Correct
M12	Monolingual	254	61	durk	durk	Matching	0.97	Similar	Same	1	Correct
M12	Monolingual	255	127	dook	deek	Mismatching	0.02	Dissimilar	Different	0	Correct
M12	Monolingual	256	42	bope	bope	Matching	0.64	Similar	Same	1	Correct
M12	Monolingual	257	92	dake	dake	Matching	0.88	Similar	Same	1	Correct
M12	Monolingual	258	185	fif	fuff	Mismatching	1	Similar	Different	0	Correct
M12	Monolingual	259	132	durk	dook	Mismatching	0.01	Dissimilar	Same	1	Incorrect
M12	Monolingual	260	11	barp	barp	Matching	1	Similar	Same	1	Correct
M12	Monolingual	261	21	fof	fof	Matching	0	Dissimilar	Same	1	Correct
M12	Monolingual	262	88	fuff	fuff	Matching	0.95	Similar	Same	1	Correct
M12	Monolingual	263	15	bowp	bowp	Matching	0.21	Dissimilar	Different	0	Incorrect
M12	Monolingual	264	207	bawp	bipe	Mismatching	1	Similar	Different	0	Correct
M12	Monolingual	265	165	bipe	bope	Mismatching	0.64	Similar	Different	0	Correct
M12	Monolingual	266	22	bipe	bipe	Matching	0.99	Similar	Same	1	Correct
M12	Monolingual	267	90	barp	barp	Matching	0.63	Similar	Different	0	Incorrect
M12	Monolingual	268	139	fif	fuff	Mismatching	0.95	Similar	Different	0	Correct
M12	Monolingual	269	48	bipe	bipe	Matching	0.99	Similar	Same	1	Correct
M12	Monolingual	270	142	fof	fuff	Mismatching	0	Dissimilar	Same	1	Incorrect
M12	Monolingual	271	264	dook	deek	Mismatching	1	Similar	Different	0	Correct
M12	Monolingual	272	38	dook	dook	Matching	0.01	Dissimilar	Different	0	Incorrect
M12	Monolingual	273	253	fuf	fof	Mismatching	0.01	Dissimilar	Different	0	Correct
M12	Monolingual	274	4	dook	dook	Matching	0.01	Dissimilar	Different	0	Incorrect
M12	Monolingual	275	221	fuf	fof	Mismatching	0.01	Dissimilar	Different	0	Correct
M12	Monolingual	276	299	dake	durk	Mismatching	0.97	Similar	Different	0	Correct
M12	Monolingual	277	45	bawp	bawp	Matching	0.92	Similar	Same	1	Correct
M12	Monolingual	278	44	deek	deek	Matching	1	Similar	Different	0	Incorrect
M12	Monolingual	279	53	durk	durk	Matching	0.95	Similar	Same	1	Correct
M12	Monolingual	280	94	bowp	bowp	Matching	0.11	Dissimilar	Same	1	Correct
M12	Monolingual	281	73	dake	dake	Matching	0.88	Similar	Same	1	Correct
M12	Monolingual	282	183	fof	faf	Mismatching	0.01	Dissimilar	Different	0	Correct
M12	Monolingual	283	298	bawp	bope	Mismatching	1	Similar	Same	1	Incorrect
M12	Monolingual	284	164	dake	deek	Mismatching	0.25	Dissimilar	Same	1	Incorrect
M12	Monolingual	285	198	deek	durk	Mismatching	0.97	Similar	Different	0	Correct
M12	Monolingual	286	212	dook	durk	Mismatching	0.95	Similar	Same	1	Incorrect
M12	Monolingual	287	140	bope	bipe	Mismatching	0.64	Similar	Different	0	Correct
M12	Monolingual	288	193	dake	dook	Mismatching	0.02	Dissimilar	Different	0	Correct
M12	Monolingual	289	60	fuff	fuff	Matching	0.9	Similar	Same	1	Correct
M12	Monolingual	290	137	fif	fuf	Mismatching	0	Dissimilar	Different	0	Correct
M12	Monolingual	291	27	durk	durk	Matching	0.97	Similar	Same	1	Correct
M12	Monolingual	292	43	fif	fif	Matching	1	Similar	Same	1	Correct
M12	Monolingual	293	55	fuff	fuff	Matching	0.9	Similar	Same	1	Correct
M12	Monolingual	294	301	bope	bawp	Mismatching	0.92	Similar	Different	0	Correct
M12	Monolingual	295	111	bope	bope	Matching	0.01	Dissimilar	Different	0	Incorrect
M12	Monolingual	296	81	durk	durk	Matching	0.97	Similar	Same	1	Correct
M12	Monolingual	297	69	bawp	bawp	Matching	0.92	Similar	Same	1	Correct
M12	Monolingual	298	166	bope	bipe	Mismatching	0.99	Similar	Different	0	Correct
M12	Monolingual	299	113	bawp	bope	Mismatching	0.01	Dissimilar	Same	1	Incorrect
M12	Monolingual	300	224	bowp	bawp	Mismatching	0.21	Dissimilar	Different	0	Correct
M12	Monolingual	301	49	barp	barp	Matching	1	Similar	Same	1	Correct
M12	Monolingual	302	235	bawp	barp	Mismatching	1	Similar	Different	0	Correct
M12	Monolingual	303	122	faf	fuff	Mismatching	0.47	Dissimilar	Different	0	Correct
M12	Monolingual	304	248	bowp	bope	Mismatching	0.01	Dissimilar	Different	0	Correct
M12	Monolingual	305	223	fof	faf	Mismatching	0.01	Dissimilar	Different	0	Correct
M12	Monolingual	306	64	fuf	fuf	Matching	0.01	Dissimilar	Different	0	Incorrect
M12	Monolingual	307	171	fuff	fof	Mismatching	0.9	Similar	Different	0	Correct
M12	Monolingual	308	162	bawp	bipe	Mismatching	1	Similar	Different	0	Correct
M12	Monolingual	309	77	bawp	bawp	Matching	1	Similar	Different	0	Incorrect
M12	Monolingual	310	206	fuf	fuff	Mismatching	0.01	Dissimilar	Same	1	Incorrect
M12	Monolingual	311	276	deek	dake	Mismatching	1	Similar	Different	0	Correct
M12	Monolingual	312	54	bope	bope	Matching	0.64	Similar	Same	1	Correct
M12	Monolingual	313	47	faf	faf	Matching	0.85	Similar	Same	1	Correct
M12	Monolingual	314	58	barp	barp	Matching	0.63	Similar	Same	1	Correct
M12	Monolingual	315	9	bope	bope	Matching	0.01	Dissimilar	Same	1	Correct
M12	Monolingual	316	189	fof	fuf	Mismatching	0.01	Dissimilar	Different	0	Correct
M12	Monolingual	317	266	fof	fuf	Mismatching	0.01	Dissimilar	Same	1	Incorrect
M12	Monolingual	318	170	dook	durk	Mismatching	0.01	Dissimilar	Same	1	Incorrect
M12	Monolingual	319	274	barp	bawp	Mismatching	0.92	Similar	Different	0	Correct
M12	Monolingual	320	280	bipe	barp	Mismatching	0.99	Similar	Same	1	Incorrect
M13	Monolingual	1	72	deek	deek	Matching	1	Similar	Same	1	Correct
M13	Monolingual	2	252	dook	dake	Mismatching	0.01	Dissimilar	Different	0	Correct
M13	Monolingual	3	82	bipe	bipe	Matching	1	Similar	Same	1	Correct
M13	Monolingual	4	311	fuff	fuf	Mismatching	0.9	Similar	Different	0	Correct
M13	Monolingual	5	119	fof	fif	Mismatching	0	Dissimilar	Different	0	Correct
M13	Monolingual	6	187	fif	fuf	Mismatching	0.99	Similar	Different	0	Correct
M13	Monolingual	7	116	bowp	barp	Mismatching	0.11	Dissimilar	Different	0	Correct
M13	Monolingual	8	94	bowp	bowp	Matching	0.11	Dissimilar	Same	1	Correct
M13	Monolingual	9	163	fuff	faf	Mismatching	0.47	Dissimilar	Different	0	Correct
M13	Monolingual	10	11	barp	barp	Matching	1	Similar	Different	0	Incorrect
M13	Monolingual	11	210	bope	bawp	Mismatching	0.64	Similar	Different	0	Correct
M13	Monolingual	12	216	barp	bipe	Mismatching	0.99	Similar	Different	0	Correct
M13	Monolingual	13	101	bowp	bowp	Matching	0.11	Dissimilar	Same	1	Correct
M13	Monolingual	14	196	bipe	bowp	Mismatching	1	Similar	Different	0	Correct
M13	Monolingual	15	62	faf	faf	Matching	0.47	Dissimilar	Same	1	Correct
M13	Monolingual	16	96	fuf	fuf	Matching	0	Dissimilar	Different	0	Incorrect
M13	Monolingual	17	17	bope	bope	Matching	0.01	Dissimilar	Different	0	Incorrect
M13	Monolingual	18	288	fof	fuff	Mismatching	0.9	Similar	Different	0	Correct
M13	Monolingual	19	200	faf	fuf	Mismatching	0	Dissimilar	Different	0	Correct
M13	Monolingual	20	16	fof	fof	Matching	0.01	Dissimilar	Same	1	Correct
M13	Monolingual	21	221	fuf	fof	Mismatching	0.01	Dissimilar	Same	1	Incorrect
M13	Monolingual	22	214	deek	dook	Mismatching	0.01	Dissimilar	Different	0	Correct
M13	Monolingual	23	282	deek	dook	Mismatching	1	Similar	Different	0	Correct
M13	Monolingual	24	113	bawp	bope	Mismatching	0.01	Dissimilar	Different	0	Correct
M13	Monolingual	25	194	barp	bipe	Mismatching	1	Similar	Different	0	Correct
M13	Monolingual	26	287	bope	bipe	Mismatching	0.64	Similar	Different	0	Correct
M13	Monolingual	27	261	dake	dook	Mismatching	0.88	Similar	Different	0	Correct
M13	Monolingual	28	51	deek	deek	Matching	1	Similar	Different	0	Incorrect
M13	Monolingual	29	125	bope	bawp	Mismatching	0.92	Similar	Different	0	Correct
M13	Monolingual	30	256	bipe	barp	Mismatching	0.63	Similar	Different	0	Correct
M13	Monolingual	31	158	fof	faf	Mismatching	0.85	Similar	Different	0	Correct
M13	Monolingual	32	19	dake	dake	Matching	0.25	Dissimilar	Same	1	Correct
M13	Monolingual	33	42	bope	bope	Matching	0.64	Similar	Same	1	Correct
M13	Monolingual	34	41	faf	faf	Matching	0.85	Similar	Same	1	Correct
M13	Monolingual	35	260	dook	durk	Mismatching	0.01	Dissimilar	Different	0	Correct
M13	Monolingual	36	173	bipe	bowp	Mismatching	0.21	Dissimilar	Different	0	Correct
M13	Monolingual	37	193	dake	dook	Mismatching	0.02	Dissimilar	Different	0	Correct
M13	Monolingual	38	24	bawp	bawp	Matching	0.92	Similar	Different	0	Incorrect
M13	Monolingual	39	237	fuf	faf	Mismatching	0.47	Dissimilar	Same	1	Incorrect
M13	Monolingual	40	254	bope	bawp	Mismatching	0.64	Similar	Different	0	Correct
M13	Monolingual	41	47	faf	faf	Matching	0.85	Similar	Same	1	Correct
M13	Monolingual	42	68	durk	durk	Matching	0.95	Similar	Same	1	Correct
M13	Monolingual	43	76	barp	barp	Matching	1	Similar	Same	1	Correct
M13	Monolingual	44	305	bipe	bowp	Mismatching	0.21	Dissimilar	Different	0	Correct
M13	Monolingual	45	264	dook	deek	Mismatching	1	Similar	Different	0	Correct
M13	Monolingual	46	124	durk	dook	Mismatching	0.97	Similar	Different	0	Correct
M13	Monolingual	47	236	fuf	faf	Mismatching	0.47	Dissimilar	Same	1	Incorrect
M13	Monolingual	48	171	fuff	fof	Mismatching	0.9	Similar	Different	0	Correct
M13	Monolingual	49	95	faf	faf	Matching	0.47	Dissimilar	Different	0	Incorrect
M13	Monolingual	50	277	bope	bowp	Mismatching	0.11	Dissimilar	Different	0	Correct
M13	Monolingual	51	229	barp	bowp	Mismatching	0.11	Dissimilar	Different	0	Correct
M13	Monolingual	52	29	dook	dook	Matching	0.02	Dissimilar	Same	1	Correct
M13	Monolingual	53	149	bipe	bope	Mismatching	0.99	Similar	Different	0	Correct
M13	Monolingual	54	2	fof	fof	Matching	0	Dissimilar	Same	1	Correct
M13	Monolingual	55	190	durk	dake	Mismatching	0.25	Dissimilar	Different	0	Correct
M13	Monolingual	56	220	bowp	bope	Mismatching	0.01	Dissimilar	Same	1	Incorrect
M13	Monolingual	57	70	bawp	bawp	Matching	0.92	Similar	Same	1	Correct
M13	Monolingual	58	295	deek	dake	Mismatching	0.88	Similar	Different	0	Correct
M13	Monolingual	59	242	faf	fuf	Mismatching	0.01	Dissimilar	Different	0	Correct
M13	Monolingual	60	303	durk	deek	Mismatching	1	Similar	Different	0	Correct
M13	Monolingual	61	148	fuff	fof	Mismatching	0	Dissimilar	Same	1	Incorrect
M13	Monolingual	62	255	fuf	faf	Mismatching	0	Dissimilar	Different	0	Correct
M13	Monolingual	63	60	fuff	fuff	Matching	0.9	Similar	Same	1	Correct
M13	Monolingual	64	312	fuf	fuff	Mismatching	0.95	Similar	Same	1	Incorrect
M13	Monolingual	65	120	bope	bowp	Mismatching	0.11	Dissimilar	Different	0	Correct
M13	Monolingual	66	21	fof	fof	Matching	0	Dissimilar	Same	1	Correct
M13	Monolingual	67	40	deek	deek	Matching	1	Similar	Same	1	Correct
M13	Monolingual	68	228	deek	dook	Mismatching	1	Similar	Different	0	Correct
M13	Monolingual	69	313	fuf	fif	Mismatching	1	Similar	Different	0	Correct
M13	Monolingual	70	213	deek	durk	Mismatching	0.97	Similar	Different	0	Correct
M13	Monolingual	71	59	fuf	fuf	Matching	0	Dissimilar	Different	0	Incorrect
M13	Monolingual	72	307	fif	faf	Mismatching	0.47	Dissimilar	Different	0	Correct
M13	Monolingual	73	18	barp	barp	Matching	0.63	Similar	Same	1	Correct
M13	Monolingual	74	133	bipe	bawp	Mismatching	1	Similar	Different	0	Correct
M13	Monolingual	75	259	bope	bipe	Mismatching	0.99	Similar	Different	0	Correct
M13	Monolingual	76	138	deek	durk	Mismatching	1	Similar	Different	0	Correct
M13	Monolingual	77	48	bipe	bipe	Matching	0.99	Similar	Same	1	Correct
M13	Monolingual	78	267	deek	dook	Mismatching	0.01	Dissimilar	Different	0	Correct
M13	Monolingual	79	79	bope	bope	Matching	0.64	Similar	Same	1	Correct
M13	Monolingual	80	53	durk	durk	Matching	0.95	Similar	Same	1	Correct
M13	Monolingual	81	175	durk	dake	Mismatching	0.88	Similar	Different	0	Correct
M13	Monolingual	82	291	dake	deek	Mismatching	1	Similar	Different	0	Correct
M13	Monolingual	83	104	durk	durk	Matching	0.95	Similar	Same	1	Correct
M13	Monolingual	84	281	bope	barp	Mismatching	0.01	Dissimilar	Same	1	Incorrect
M13	Monolingual	85	234	dook	dake	Mismatching	0.01	Dissimilar	Different	0	Correct
M13	Monolingual	86	279	fif	fof	Mismatching	0.99	Similar	Different	0	Correct
M13	Monolingual	87	317	bowp	barp	Mismatching	0.21	Dissimilar	Same	1	Incorrect
M13	Monolingual	88	232	fuff	fif	Mismatching	0.99	Similar	Different	0	Correct
M13	Monolingual	89	257	fuff	fof	Mismatching	0.95	Similar	Same	1	Incorrect
M13	Monolingual	90	306	fif	faf	Mismatching	0.99	Similar	Different	0	Correct
M13	Monolingual	91	233	fuf	fuff	Mismatching	0.01	Dissimilar	Same	1	Incorrect
M13	Monolingual	92	204	bawp	bipe	Mismatching	1	Similar	Different	0	Correct
M13	Monolingual	93	49	barp	barp	Matching	1	Similar	Same	1	Correct
M13	Monolingual	94	58	barp	barp	Matching	0.63	Similar	Same	1	Correct
M13	Monolingual	95	166	bope	bipe	Mismatching	0.99	Similar	Different	0	Correct
M13	Monolingual	96	88	fuff	fuff	Matching	0.95	Similar	Same	1	Correct
M13	Monolingual	97	197	fuf	fof	Mismatching	0.01	Dissimilar	Same	1	Incorrect
M13	Monolingual	98	284	bowp	bipe	Mismatching	0.99	Similar	Different	0	Correct
M13	Monolingual	99	245	dake	durk	Mismatching	0.25	Dissimilar	Different	0	Correct
M13	Monolingual	100	65	dook	dook	Matching	0.01	Dissimilar	Same	1	Correct
M13	Monolingual	101	290	fuff	fif	Mismatching	1	Similar	Different	0	Correct
M13	Monolingual	102	185	fif	fuff	Mismatching	1	Similar	Different	0	Correct
M13	Monolingual	103	10	fuff	fuff	Matching	0.9	Similar	Same	1	Correct
M13	Monolingual	104	155	bawp	bowp	Mismatching	0.11	Dissimilar	Different	0	Correct
M13	Monolingual	105	224	bowp	bawp	Mismatching	0.21	Dissimilar	Different	0	Correct
M13	Monolingual	106	302	barp	bipe	Mismatching	0.63	Similar	Different	0	Correct
M13	Monolingual	107	135	faf	fof	Mismatching	0.01	Dissimilar	Different	0	Correct
M13	Monolingual	108	150	dake	durk	Mismatching	0.88	Similar	Different	0	Correct
M13	Monolingual	109	83	fif	fif	Matching	0.99	Similar	Same	1	Correct
M13	Monolingual	110	172	fuf	fif	Mismatching	1	Similar	Different	0	Correct
M13	Monolingual	111	258	bawp	bope	Mismatching	1	Similar	Same	1	Incorrect
M13	Monolingual	112	201	bowp	barp	Mismatching	1	Similar	Different	0	Correct
M13	Monolingual	113	299	dake	durk	Mismatching	0.97	Similar	Different	0	Correct
M13	Monolingual	114	74	fif	fif	Matching	0.99	Similar	Same	1	Correct
M13	Monolingual	115	118	durk	dook	Mismatching	0.02	Dissimilar	Different	0	Correct
M13	Monolingual	116	131	bope	barp	Mismatching	0.01	Dissimilar	Same	1	Incorrect
M13	Monolingual	117	91	fif	fif	Matching	1	Similar	Same	1	Correct
M13	Monolingual	118	297	faf	fif	Mismatching	0.85	Similar	Different	0	Correct
M13	Monolingual	119	139	fif	fuff	Mismatching	0.95	Similar	Different	0	Correct
M13	Monolingual	120	77	bawp	bawp	Matching	1	Similar	Same	1	Correct
M13	Monolingual	121	45	bawp	bawp	Matching	0.92	Similar	Same	1	Correct
M13	Monolingual	122	92	dake	dake	Matching	0.88	Similar	Same	1	Correct
M13	Monolingual	123	143	fuff	faf	Mismatching	0.95	Similar	Different	0	Correct
M13	Monolingual	124	243	fuf	faf	Mismatching	0	Dissimilar	Different	0	Correct
M13	Monolingual	125	181	bawp	bipe	Mismatching	1	Similar	Different	0	Correct
M13	Monolingual	126	304	fuff	fuf	Mismatching	0.9	Similar	Different	0	Correct
M13	Monolingual	127	127	dook	deek	Mismatching	0.02	Dissimilar	Different	0	Correct
M13	Monolingual	128	39	deek	deek	Matching	1	Similar	Same	1	Correct
M13	Monolingual	129	112	fuff	fuff	Matching	0.9	Similar	Same	1	Correct
M13	Monolingual	130	50	deek	deek	Matching	1	Similar	Same	1	Correct
M13	Monolingual	131	111	bope	bope	Matching	0.01	Dissimilar	Same	1	Correct
M13	Monolingual	132	273	bawp	bope	Mismatching	0.01	Dissimilar	Same	1	Incorrect
M13	Monolingual	133	102	dake	dake	Matching	0.88	Similar	Same	1	Correct
M13	Monolingual	134	314	fof	fuff	Mismatching	0	Dissimilar	Different	0	Correct
M13	Monolingual	135	207	bawp	bipe	Mismatching	1	Similar	Different	0	Correct
M13	Monolingual	136	292	dook	deek	Mismatching	0.02	Dissimilar	Different	0	Correct
M13	Monolingual	137	316	bowp	bope	Mismatching	0.21	Dissimilar	Same	1	Incorrect
M13	Monolingual	138	253	fuf	fof	Mismatching	0.01	Dissimilar	Same	1	Incorrect
M13	Monolingual	139	80	faf	faf	Matching	0.85	Similar	Same	1	Correct
M13	Monolingual	140	202	fuf	fuff	Mismatching	0.95	Similar	Different	0	Correct
M13	Monolingual	141	189	fof	fuf	Mismatching	0.01	Dissimilar	Same	1	Incorrect
M13	Monolingual	142	6	fif	fif	Matching	1	Similar	Same	1	Correct
M13	Monolingual	143	247	durk	deek	Mismatching	0.95	Similar	Different	0	Correct
M13	Monolingual	144	218	fof	fif	Mismatching	0	Dissimilar	Different	0	Correct
M13	Monolingual	145	209	dook	dake	Mismatching	0.25	Dissimilar	Different	0	Correct
M13	Monolingual	146	191	bawp	barp	Mismatching	1	Similar	Different	0	Correct
M13	Monolingual	147	128	fuff	fuf	Mismatching	0	Dissimilar	Same	1	Incorrect
M13	Monolingual	148	296	barp	bowp	Mismatching	0.63	Similar	Same	1	Incorrect
M13	Monolingual	149	84	dake	dake	Matching	0.25	Dissimilar	Same	1	Correct
M13	Monolingual	150	249	bawp	bowp	Mismatching	0.92	Similar	Same	1	Incorrect
M13	Monolingual	151	170	dook	durk	Mismatching	0.01	Dissimilar	Different	0	Correct
M13	Monolingual	152	99	fuf	fuf	Matching	0	Dissimilar	Different	0	Incorrect
M13	Monolingual	153	160	bawp	bowp	Mismatching	0.92	Similar	Same	1	Incorrect
M13	Monolingual	154	276	deek	dake	Mismatching	1	Similar	Different	0	Correct
M13	Monolingual	155	129	barp	bipe	Mismatching	1	Similar	Different	0	Correct
M13	Monolingual	156	319	bipe	bowp	Mismatching	1	Similar	Different	0	Correct
M13	Monolingual	157	203	bowp	bope	Mismatching	0.21	Dissimilar	Same	1	Incorrect
M13	Monolingual	158	78	bowp	bowp	Matching	0.11	Dissimilar	Same	1	Correct
M13	Monolingual	159	215	faf	fof	Mismatching	0.85	Similar	Different	0	Correct
M13	Monolingual	160	298	bawp	bope	Mismatching	1	Similar	Same	1	Incorrect
M13	Monolingual	161	206	fuf	fuff	Mismatching	0.01	Dissimilar	Same	1	Incorrect
M13	Monolingual	162	198	deek	durk	Mismatching	0.97	Similar	Different	0	Correct
M13	Monolingual	163	23	durk	durk	Matching	0.97	Similar	Same	1	Correct
M13	Monolingual	164	270	durk	dook	Mismatching	0.95	Similar	Different	0	Correct
M13	Monolingual	165	57	bope	bope	Matching	0.01	Dissimilar	Same	1	Correct
M13	Monolingual	166	294	bowp	barp	Mismatching	0.63	Similar	Same	1	Incorrect
M13	Monolingual	167	4	dook	dook	Matching	0.01	Dissimilar	Same	1	Correct
M13	Monolingual	168	22	bipe	bipe	Matching	0.99	Similar	Same	1	Correct
M13	Monolingual	169	184	barp	bowp	Mismatching	0.21	Dissimilar	Same	1	Incorrect
M13	Monolingual	170	144	fif	fuf	Mismatching	0	Dissimilar	Different	0	Correct
M13	Monolingual	171	31	dake	dake	Matching	0.88	Similar	Same	1	Correct
M13	Monolingual	172	7	bawp	bawp	Matching	1	Similar	Same	1	Correct
M13	Monolingual	173	86	bowp	bowp	Matching	0.21	Dissimilar	Same	1	Correct
M13	Monolingual	174	38	dook	dook	Matching	0.01	Dissimilar	Same	1	Correct
M13	Monolingual	175	12	fif	fif	Matching	0.99	Similar	Same	1	Correct
M13	Monolingual	176	35	fuff	fuff	Matching	0.95	Similar	Same	1	Correct
M13	Monolingual	177	161	bope	barp	Mismatching	1	Similar	Same	1	Incorrect
M13	Monolingual	178	230	barp	bope	Mismatching	0.01	Dissimilar	Same	1	Incorrect
M13	Monolingual	179	64	fuf	fuf	Matching	0.01	Dissimilar	Different	0	Incorrect
M13	Monolingual	180	320	fof	fuff	Mismatching	0.9	Similar	Same	1	Incorrect
M13	Monolingual	181	130	fuff	fuf	Mismatching	0	Dissimilar	Same	1	Incorrect
M13	Monolingual	182	43	fif	fif	Matching	1	Similar	Same	1	Correct
M13	Monolingual	183	164	dake	deek	Mismatching	0.25	Dissimilar	Different	0	Correct
M13	Monolingual	184	244	faf	fif	Mismatching	1	Similar	Different	0	Correct
M13	Monolingual	185	318	bowp	bipe	Mismatching	0.21	Dissimilar	Different	0	Correct
M13	Monolingual	186	217	deek	durk	Mismatching	1	Similar	Different	0	Correct
M13	Monolingual	187	44	deek	deek	Matching	1	Similar	Same	1	Correct
M13	Monolingual	188	285	fof	fuf	Mismatching	0.01	Dissimilar	Same	1	Incorrect
M13	Monolingual	189	15	bowp	bowp	Matching	0.21	Dissimilar	Same	1	Correct
M13	Monolingual	190	238	bipe	bawp	Mismatching	1	Similar	Different	0	Correct
M13	Monolingual	191	208	faf	fuf	Mismatching	0.85	Similar	Different	0	Correct
M13	Monolingual	192	136	durk	dake	Mismatching	0.95	Similar	Different	0	Correct
M13	Monolingual	193	176	faf	fuff	Mismatching	0.9	Similar	Different	0	Correct
M13	Monolingual	194	98	fof	fof	Matching	0.01	Dissimilar	Same	1	Correct
M13	Monolingual	195	293	fof	fif	Mismatching	0.99	Similar	Different	0	Correct
M13	Monolingual	196	81	durk	durk	Matching	0.97	Similar	Same	1	Correct
M13	Monolingual	197	154	bope	bowp	Mismatching	0.64	Similar	Same	1	Incorrect
M13	Monolingual	198	46	bope	bope	Matching	0.64	Similar	Same	1	Correct
M13	Monolingual	199	183	fof	faf	Mismatching	0.01	Dissimilar	Different	0	Correct
M13	Monolingual	200	167	barp	bawp	Mismatching	0.92	Similar	Same	1	Incorrect
M13	Monolingual	201	114	durk	dake	Mismatching	0.97	Similar	Different	0	Correct
M13	Monolingual	202	235	bawp	barp	Mismatching	1	Similar	Same	1	Incorrect
M13	Monolingual	203	33	dake	dake	Matching	0.25	Dissimilar	Same	1	Correct
M13	Monolingual	204	3	dake	dake	Matching	0.25	Dissimilar	Same	1	Correct
M13	Monolingual	205	248	bowp	bope	Mismatching	0.01	Dissimilar	Same	1	Incorrect
M13	Monolingual	206	27	durk	durk	Matching	0.97	Similar	Same	1	Correct
M13	Monolingual	207	241	dake	durk	Mismatching	0.95	Similar	Different	0	Correct
M13	Monolingual	208	145	faf	fif	Mismatching	1	Similar	Different	0	Correct
M13	Monolingual	209	231	fuf	fif	Mismatching	0.01	Dissimilar	Different	0	Correct
M13	Monolingual	210	36	fuf	fuf	Matching	0.01	Dissimilar	Different	0	Incorrect
M13	Monolingual	211	205	fuf	fof	Mismatching	0.01	Dissimilar	Same	1	Incorrect
M13	Monolingual	212	211	fuff	faf	Mismatching	0.9	Similar	Different	0	Correct
M13	Monolingual	213	110	barp	barp	Matching	1	Similar	Same	1	Correct
M13	Monolingual	214	97	bipe	bipe	Matching	1	Similar	Same	1	Correct
M13	Monolingual	215	25	bipe	bipe	Matching	1	Similar	Same	1	Correct
M13	Monolingual	216	146	barp	bope	Mismatching	0.63	Similar	Same	1	Incorrect
M13	Monolingual	217	147	fif	fof	Mismatching	0	Dissimilar	Different	0	Correct
M13	Monolingual	218	310	faf	fuff	Mismatching	0.85	Similar	Different	0	Correct
M13	Monolingual	219	115	fuff	fof	Mismatching	0.01	Dissimilar	Same	1	Incorrect
M13	Monolingual	220	123	fuf	fif	Mismatching	0.01	Dissimilar	Different	0	Correct
M13	Monolingual	221	162	bawp	bipe	Mismatching	1	Similar	Different	0	Correct
M13	Monolingual	222	75	deek	deek	Matching	1	Similar	Same	1	Correct
M13	Monolingual	223	54	bope	bope	Matching	0.64	Similar	Same	1	Correct
M13	Monolingual	224	289	bowp	bawp	Mismatching	1	Similar	Same	1	Incorrect
M13	Monolingual	225	151	dook	dake	Mismatching	0.25	Dissimilar	Different	0	Correct
M13	Monolingual	226	159	fif	fuf	Mismatching	0.99	Similar	Different	0	Correct
M13	Monolingual	227	188	fuff	fif	Mismatching	0.9	Similar	Different	0	Correct
M13	Monolingual	228	178	bowp	bipe	Mismatching	1	Similar	Different	0	Correct
M13	Monolingual	229	195	bowp	bawp	Mismatching	0.92	Similar	Same	1	Incorrect
M13	Monolingual	230	66	fif	fif	Matching	1	Similar	Same	1	Correct
M13	Monolingual	231	250	fof	fuf	Mismatching	0.01	Dissimilar	Same	1	Incorrect
M13	Monolingual	232	268	faf	fuf	Mismatching	0.47	Dissimilar	Same	1	Incorrect
M13	Monolingual	233	28	bipe	bipe	Matching	0.99	Similar	Same	1	Correct
M13	Monolingual	234	85	bowp	bowp	Matching	0.21	Dissimilar	Same	1	Correct
M13	Monolingual	235	109	fif	fif	Matching	0.99	Similar	Same	1	Correct
M13	Monolingual	236	122	faf	fuff	Mismatching	0.47	Dissimilar	Different	0	Correct
M13	Monolingual	237	56	fof	fof	Matching	0	Dissimilar	Same	1	Correct
M13	Monolingual	238	300	barp	bope	Mismatching	1	Similar	Different	0	Correct
M13	Monolingual	239	52	bowp	bowp	Matching	0.21	Dissimilar	Same	1	Correct
M13	Monolingual	240	251	barp	bope	Mismatching	0.64	Similar	Different	0	Correct
M13	Monolingual	241	140	bope	bipe	Mismatching	0.64	Similar	Different	0	Correct
M13	Monolingual	242	26	faf	faf	Matching	0.47	Dissimilar	Same	1	Correct
M13	Monolingual	243	142	fof	fuff	Mismatching	0	Dissimilar	Same	1	Incorrect
M13	Monolingual	244	9	bope	bope	Matching	0.01	Dissimilar	Same	1	Correct
M13	Monolingual	245	93	bawp	bawp	Matching	1	Similar	Same	1	Correct
M13	Monolingual	246	156	bope	barp	Mismatching	1	Similar	Different	0	Correct
M13	Monolingual	247	182	bipe	barp	Mismatching	0.63	Similar	Different	0	Correct
M13	Monolingual	248	121	faf	fuff	Mismatching	0.95	Similar	Different	0	Correct
M13	Monolingual	249	169	fuff	fif	Mismatching	0.95	Similar	Different	0	Correct
M13	Monolingual	250	274	barp	bawp	Mismatching	0.92	Similar	Different	0	Correct
M13	Monolingual	251	55	fuff	fuff	Matching	0.9	Similar	Same	1	Correct
M13	Monolingual	252	32	bowp	bowp	Matching	0.11	Dissimilar	Same	1	Correct
M13	Monolingual	253	69	bawp	bawp	Matching	0.92	Similar	Same	1	Correct
M13	Monolingual	254	286	fif	fof	Mismatching	0.99	Similar	Different	0	Correct
M13	Monolingual	255	177	dake	deek	Mismatching	0.88	Similar	Different	0	Correct
M13	Monolingual	256	153	bawp	barp	Mismatching	1	Similar	Same	1	Incorrect
M13	Monolingual	257	227	fif	fuff	Mismatching	0.95	Similar	Different	0	Correct
M13	Monolingual	258	117	deek	dake	Mismatching	1	Similar	Different	0	Correct
M13	Monolingual	259	73	dake	dake	Matching	0.88	Similar	Same	1	Correct
M13	Monolingual	260	265	bowp	bawp	Mismatching	0.11	Dissimilar	Same	1	Incorrect
M13	Monolingual	261	13	barp	barp	Matching	0.63	Similar	Same	1	Correct
M13	Monolingual	262	5	fof	fof	Matching	0.01	Dissimilar	Same	1	Correct
M13	Monolingual	263	315	bipe	bope	Mismatching	0.99	Similar	Different	0	Correct
M13	Monolingual	264	14	bipe	bipe	Matching	0.99	Similar	Same	1	Correct
M13	Monolingual	265	275	bipe	barp	Mismatching	0.99	Similar	Different	0	Correct
M13	Monolingual	266	37	fuf	fuf	Matching	0.01	Dissimilar	Different	0	Incorrect
M13	Monolingual	267	20	dook	dook	Matching	0.02	Dissimilar	Same	1	Correct
M13	Monolingual	268	157	fof	fif	Mismatching	0.99	Similar	Different	0	Correct
M13	Monolingual	269	34	fuf	fuf	Matching	0	Dissimilar	Same	1	Correct
M13	Monolingual	270	263	fif	fof	Mismatching	0	Dissimilar	Different	0	Correct
M13	Monolingual	271	180	fif	faf	Mismatching	0.99	Similar	Different	0	Correct
M13	Monolingual	272	280	bipe	barp	Mismatching	0.99	Similar	Different	0	Correct
M13	Monolingual	273	61	durk	durk	Matching	0.97	Similar	Same	1	Correct
M13	Monolingual	274	222	deek	dake	Mismatching	0.88	Similar	Same	1	Incorrect
M13	Monolingual	275	165	bipe	bope	Mismatching	0.64	Similar	Different	0	Correct
M13	Monolingual	276	87	fof	fof	Matching	0	Dissimilar	Same	1	Correct
M13	Monolingual	277	103	dook	dook	Matching	0.01	Dissimilar	Same	1	Correct
M13	Monolingual	278	8	faf	faf	Matching	0.47	Dissimilar	Same	1	Correct
M13	Monolingual	279	126	dake	dook	Mismatching	0.02	Dissimilar	Different	0	Correct
M13	Monolingual	280	239	dook	deek	Mismatching	1	Similar	Different	0	Correct
M13	Monolingual	281	179	faf	fof	Mismatching	0	Dissimilar	Different	0	Correct
M13	Monolingual	282	107	fuf	fuf	Matching	0.01	Dissimilar	Same	1	Correct
M13	Monolingual	283	225	dake	deek	Mismatching	1	Similar	Different	0	Correct
M13	Monolingual	284	301	bope	bawp	Mismatching	0.92	Similar	Same	1	Incorrect
M13	Monolingual	285	308	bope	bowp	Mismatching	0.64	Similar	Same	1	Incorrect
M13	Monolingual	286	67	fuff	fuff	Matching	0.95	Similar	Same	1	Correct
M13	Monolingual	287	278	faf	fof	Mismatching	0.47	Dissimilar	Different	0	Correct
M13	Monolingual	288	108	durk	durk	Matching	0.95	Similar	Same	1	Correct
M13	Monolingual	289	106	faf	faf	Matching	0.85	Similar	Same	1	Correct
M13	Monolingual	290	262	fif	faf	Mismatching	0.47	Dissimilar	Different	0	Correct
M13	Monolingual	291	283	barp	bawp	Mismatching	0.63	Similar	Same	1	Incorrect
M13	Monolingual	292	30	dook	dook	Matching	0.02	Dissimilar	Same	1	Correct
M13	Monolingual	293	271	fof	faf	Mismatching	0.85	Similar	Different	0	Correct
M13	Monolingual	294	137	fif	fuf	Mismatching	0	Dissimilar	Different	0	Correct
M13	Monolingual	295	240	fif	fuff	Mismatching	1	Similar	Different	0	Correct
M13	Monolingual	296	266	fof	fuf	Mismatching	0.01	Dissimilar	Same	1	Incorrect
M13	Monolingual	297	223	fof	faf	Mismatching	0.01	Dissimilar	Different	0	Correct
M13	Monolingual	298	186	bawp	barp	Mismatching	1	Similar	Same	1	Incorrect
M13	Monolingual	299	269	bawp	bowp	Mismatching	0.11	Dissimilar	Same	1	Incorrect
M13	Monolingual	300	168	bipe	bope	Mismatching	0.64	Similar	Different	0	Correct
M13	Monolingual	301	89	bawp	bawp	Matching	1	Similar	Same	1	Correct
M13	Monolingual	302	309	bipe	bawp	Mismatching	1	Similar	Different	0	Correct
M13	Monolingual	303	134	dook	durk	Mismatching	0.95	Similar	Same	1	Incorrect
M13	Monolingual	304	226	barp	bowp	Mismatching	1	Similar	Different	0	Correct
M13	Monolingual	305	272	durk	deek	Mismatching	1	Similar	Different	0	Correct
M13	Monolingual	306	141	faf	fif	Mismatching	0.85	Similar	Different	0	Correct
M13	Monolingual	307	71	fuff	fuff	Matching	0.95	Similar	Same	1	Correct
M13	Monolingual	308	152	dake	dook	Mismatching	0.88	Similar	Different	0	Correct
M13	Monolingual	309	63	fof	fof	Matching	0.01	Dissimilar	Same	1	Correct
M13	Monolingual	310	174	bipe	bawp	Mismatching	1	Similar	Different	0	Correct
M13	Monolingual	311	246	fuff	faf	Mismatching	0.85	Similar	Different	0	Correct
M13	Monolingual	312	100	bipe	bipe	Matching	1	Similar	Same	1	Correct
M13	Monolingual	313	219	barp	bawp	Mismatching	0.63	Similar	Same	1	Incorrect
M13	Monolingual	314	1	deek	deek	Matching	1	Similar	Same	1	Correct
M13	Monolingual	315	192	bowp	bipe	Mismatching	0.11	Dissimilar	Different	0	Correct
M13	Monolingual	316	199	durk	deek	Mismatching	0.95	Similar	Different	0	Correct
M13	Monolingual	317	212	dook	durk	Mismatching	0.95	Similar	Same	1	Incorrect
M13	Monolingual	318	132	durk	dook	Mismatching	0.01	Dissimilar	Different	0	Correct
M13	Monolingual	319	105	dook	dook	Matching	0.02	Dissimilar	Same	1	Correct
M13	Monolingual	320	90	barp	barp	Matching	0.63	Similar	Same	1	Correct
M14	Monolingual	1	284	bowp	bipe	Mismatching	0.99	Similar	Different	0	Correct
M14	Monolingual	2	88	fuff	fuff	Matching	0.95	Similar	Same	1	Correct
M14	Monolingual	3	81	durk	durk	Matching	0.97	Similar	Same	1	Correct
M14	Monolingual	4	13	barp	barp	Matching	0.63	Similar	Same	1	Correct
M14	Monolingual	5	190	durk	dake	Mismatching	0.25	Dissimilar	Different	0	Correct
M14	Monolingual	6	36	fuf	fuf	Matching	0.01	Dissimilar	Same	1	Correct
M14	Monolingual	7	271	fof	faf	Mismatching	0.85	Similar	Different	0	Correct
M14	Monolingual	8	89	bawp	bawp	Matching	1	Similar	Same	1	Correct
M14	Monolingual	9	216	barp	bipe	Mismatching	0.99	Similar	Different	0	Correct
M14	Monolingual	10	269	bawp	bowp	Mismatching	0.11	Dissimilar	Different	0	Correct
M14	Monolingual	11	128	fuff	fuf	Mismatching	0	Dissimilar	Different	0	Correct
M14	Monolingual	12	208	faf	fuf	Mismatching	0.85	Similar	Same	1	Incorrect
M14	Monolingual	13	286	fif	fof	Mismatching	0.99	Similar	Different	0	Correct
M14	Monolingual	14	129	barp	bipe	Mismatching	1	Similar	Different	0	Correct
M14	Monolingual	15	99	fuf	fuf	Matching	0	Dissimilar	Same	1	Correct
M14	Monolingual	16	56	fof	fof	Matching	0	Dissimilar	Same	1	Correct
M14	Monolingual	17	60	fuff	fuff	Matching	0.9	Similar	Same	1	Correct
M14	Monolingual	18	123	fuf	fif	Mismatching	0.01	Dissimilar	Different	0	Correct
M14	Monolingual	19	282	deek	dook	Mismatching	1	Similar	Different	0	Correct
M14	Monolingual	20	218	fof	fif	Mismatching	0	Dissimilar	Different	0	Correct
M14	Monolingual	21	186	bawp	barp	Mismatching	1	Similar	Different	0	Correct
M14	Monolingual	22	119	fof	fif	Mismatching	0	Dissimilar	Different	0	Correct
M14	Monolingual	23	199	durk	deek	Mismatching	0.95	Similar	Different	0	Correct
M14	Monolingual	24	242	faf	fuf	Mismatching	0.01	Dissimilar	Different	0	Correct
M14	Monolingual	25	46	bope	bope	Matching	0.64	Similar	Different	0	Incorrect
M14	Monolingual	26	230	barp	bope	Mismatching	0.01	Dissimilar	Different	0	Correct
M14	Monolingual	27	292	dook	deek	Mismatching	0.02	Dissimilar	Different	0	Correct
M14	Monolingual	28	295	deek	dake	Mismatching	0.88	Similar	Different	0	Correct
M14	Monolingual	29	3	dake	dake	Matching	0.25	Dissimilar	Same	1	Correct
M14	Monolingual	30	90	barp	barp	Matching	0.63	Similar	Same	1	Correct
M14	Monolingual	31	66	fif	fif	Matching	1	Similar	Same	1	Correct
M14	Monolingual	32	231	fuf	fif	Mismatching	0.01	Dissimilar	Different	0	Correct
M14	Monolingual	33	193	dake	dook	Mismatching	0.02	Dissimilar	Different	0	Correct
M14	Monolingual	34	247	durk	deek	Mismatching	0.95	Similar	Different	0	Correct
M14	Monolingual	35	8	faf	faf	Matching	0.47	Dissimilar	Same	1	Correct
M14	Monolingual	36	132	durk	dook	Mismatching	0.01	Dissimilar	Different	0	Correct
M14	Monolingual	37	276	deek	dake	Mismatching	1	Similar	Different	0	Correct
M14	Monolingual	38	299	dake	durk	Mismatching	0.97	Similar	Different	0	Correct
M14	Monolingual	39	2	fof	fof	Matching	0	Dissimilar	Same	1	Correct
M14	Monolingual	40	24	bawp	bawp	Matching	0.92	Similar	Same	1	Correct
M14	Monolingual	41	222	deek	dake	Mismatching	0.88	Similar	Same	1	Incorrect
M14	Monolingual	42	287	bope	bipe	Mismatching	0.64	Similar	Different	0	Correct
M14	Monolingual	43	122	faf	fuff	Mismatching	0.47	Dissimilar	Different	0	Correct
M14	Monolingual	44	139	fif	fuff	Mismatching	0.95	Similar	Different	0	Correct
M14	Monolingual	45	114	durk	dake	Mismatching	0.97	Similar	Different	0	Correct
M14	Monolingual	46	117	deek	dake	Mismatching	1	Similar	Different	0	Correct
M14	Monolingual	47	263	fif	fof	Mismatching	0	Dissimilar	Different	0	Correct
M14	Monolingual	48	111	bope	bope	Matching	0.01	Dissimilar	Different	0	Incorrect
M14	Monolingual	49	188	fuff	fif	Mismatching	0.9	Similar	Different	0	Correct
M14	Monolingual	50	85	bowp	bowp	Matching	0.21	Dissimilar	Same	1	Correct
M14	Monolingual	51	102	dake	dake	Matching	0.88	Similar	Same	1	Correct
M14	Monolingual	52	254	bope	bawp	Mismatching	0.64	Similar	Different	0	Correct
M14	Monolingual	53	294	bowp	barp	Mismatching	0.63	Similar	Different	0	Correct
M14	Monolingual	54	19	dake	dake	Matching	0.25	Dissimilar	Same	1	Correct
M14	Monolingual	55	262	fif	faf	Mismatching	0.47	Dissimilar	Different	0	Correct
M14	Monolingual	56	158	fof	faf	Mismatching	0.85	Similar	Different	0	Correct
M14	Monolingual	57	105	dook	dook	Matching	0.02	Dissimilar	Different	0	Incorrect
M14	Monolingual	58	25	bipe	bipe	Matching	1	Similar	Same	1	Correct
M14	Monolingual	59	211	fuff	faf	Mismatching	0.9	Similar	Different	0	Correct
M14	Monolingual	60	52	bowp	bowp	Matching	0.21	Dissimilar	Same	1	Correct
M14	Monolingual	61	153	bawp	barp	Mismatching	1	Similar	Different	0	Correct
M14	Monolingual	62	171	fuff	fof	Mismatching	0.9	Similar	Same	1	Incorrect
M14	Monolingual	63	145	faf	fif	Mismatching	1	Similar	Different	0	Correct
M14	Monolingual	64	64	fuf	fuf	Matching	0.01	Dissimilar	Different	0	Incorrect
M14	Monolingual	65	14	bipe	bipe	Matching	0.99	Similar	Same	1	Correct
M14	Monolingual	66	163	fuff	faf	Mismatching	0.47	Dissimilar	Different	0	Correct
M14	Monolingual	67	20	dook	dook	Matching	0.02	Dissimilar	Different	0	Incorrect
M14	Monolingual	68	178	bowp	bipe	Mismatching	1	Similar	Different	0	Correct
M14	Monolingual	69	226	barp	bowp	Mismatching	1	Similar	Different	0	Correct
M14	Monolingual	70	48	bipe	bipe	Matching	0.99	Similar	Same	1	Correct
M14	Monolingual	71	246	fuff	faf	Mismatching	0.85	Similar	Different	0	Correct
M14	Monolingual	72	217	deek	durk	Mismatching	1	Similar	Same	1	Incorrect
M14	Monolingual	73	79	bope	bope	Matching	0.64	Similar	Different	0	Incorrect
M14	Monolingual	74	10	fuff	fuff	Matching	0.9	Similar	Same	1	Correct
M14	Monolingual	75	121	faf	fuff	Mismatching	0.95	Similar	Different	0	Correct
M14	Monolingual	76	50	deek	deek	Matching	1	Similar	Different	0	Incorrect
M14	Monolingual	77	180	fif	faf	Mismatching	0.99	Similar	Different	0	Correct
M14	Monolingual	78	118	durk	dook	Mismatching	0.02	Dissimilar	Different	0	Correct
M14	Monolingual	79	319	bipe	bowp	Mismatching	1	Similar	Different	0	Correct
M14	Monolingual	80	304	fuff	fuf	Mismatching	0.9	Similar	Different	0	Correct
M14	Monolingual	81	162	bawp	bipe	Mismatching	1	Similar	Different	0	Correct
M14	Monolingual	82	210	bope	bawp	Mismatching	0.64	Similar	Different	0	Correct
M14	Monolingual	83	86	bowp	bowp	Matching	0.21	Dissimilar	Same	1	Correct
M14	Monolingual	84	239	dook	deek	Mismatching	1	Similar	Same	1	Incorrect
M14	Monolingual	85	93	bawp	bawp	Matching	1	Similar	Same	1	Correct
M14	Monolingual	86	280	bipe	barp	Mismatching	0.99	Similar	Same	1	Incorrect
M14	Monolingual	87	22	bipe	bipe	Matching	0.99	Similar	Same	1	Correct
M14	Monolingual	88	215	faf	fof	Mismatching	0.85	Similar	Different	0	Correct
M14	Monolingual	89	261	dake	dook	Mismatching	0.88	Similar	Same	1	Incorrect
M14	Monolingual	90	309	bipe	bawp	Mismatching	1	Similar	Different	0	Correct
M14	Monolingual	91	196	bipe	bowp	Mismatching	1	Similar	Different	0	Correct
M14	Monolingual	92	205	fuf	fof	Mismatching	0.01	Dissimilar	Same	1	Incorrect
M14	Monolingual	93	236	fuf	faf	Mismatching	0.47	Dissimilar	Same	1	Incorrect
M14	Monolingual	94	169	fuff	fif	Mismatching	0.95	Similar	Different	0	Correct
M14	Monolingual	95	12	fif	fif	Matching	0.99	Similar	Same	1	Correct
M14	Monolingual	96	207	bawp	bipe	Mismatching	1	Similar	Different	0	Correct
M14	Monolingual	97	225	dake	deek	Mismatching	1	Similar	Different	0	Correct
M14	Monolingual	98	53	durk	durk	Matching	0.95	Similar	Same	1	Correct
M14	Monolingual	99	124	durk	dook	Mismatching	0.97	Similar	Different	0	Correct
M14	Monolingual	100	27	durk	durk	Matching	0.97	Similar	Same	1	Correct
M14	Monolingual	101	15	bowp	bowp	Matching	0.21	Dissimilar	Same	1	Correct
M14	Monolingual	102	134	dook	durk	Mismatching	0.95	Similar	Different	0	Correct
M14	Monolingual	103	201	bowp	barp	Mismatching	1	Similar	Different	0	Correct
M14	Monolingual	104	311	fuff	fuf	Mismatching	0.9	Similar	Same	1	Incorrect
M14	Monolingual	105	250	fof	fuf	Mismatching	0.01	Dissimilar	Same	1	Incorrect
M14	Monolingual	106	156	bope	barp	Mismatching	1	Similar	Different	0	Correct
M14	Monolingual	107	288	fof	fuff	Mismatching	0.9	Similar	Same	1	Incorrect
M14	Monolingual	108	233	fuf	fuff	Mismatching	0.01	Dissimilar	Same	1	Incorrect
M14	Monolingual	109	147	fif	fof	Mismatching	0	Dissimilar	Same	1	Incorrect
M14	Monolingual	110	83	fif	fif	Matching	0.99	Similar	Same	1	Correct
M14	Monolingual	111	146	barp	bope	Mismatching	0.63	Similar	Different	0	Correct
M14	Monolingual	112	203	bowp	bope	Mismatching	0.21	Dissimilar	Different	0	Correct
M14	Monolingual	113	170	dook	durk	Mismatching	0.01	Dissimilar	Same	1	Incorrect
M14	Monolingual	114	30	dook	dook	Matching	0.02	Dissimilar	Same	1	Correct
M14	Monolingual	115	154	bope	bowp	Mismatching	0.64	Similar	Same	1	Incorrect
M14	Monolingual	116	7	bawp	bawp	Matching	1	Similar	Same	1	Correct
M14	Monolingual	117	173	bipe	bowp	Mismatching	0.21	Dissimilar	Different	0	Correct
M14	Monolingual	118	73	dake	dake	Matching	0.88	Similar	Different	0	Incorrect
M14	Monolingual	119	297	faf	fif	Mismatching	0.85	Similar	Different	0	Correct
M14	Monolingual	120	291	dake	deek	Mismatching	1	Similar	Different	0	Correct
M14	Monolingual	121	224	bowp	bawp	Mismatching	0.21	Dissimilar	Different	0	Correct
M14	Monolingual	122	303	durk	deek	Mismatching	1	Similar	Different	0	Correct
M14	Monolingual	123	1	deek	deek	Matching	1	Similar	Same	1	Correct
M14	Monolingual	124	165	bipe	bope	Mismatching	0.64	Similar	Different	0	Correct
M14	Monolingual	125	103	dook	dook	Matching	0.01	Dissimilar	Same	1	Correct
M14	Monolingual	126	275	bipe	barp	Mismatching	0.99	Similar	Different	0	Correct
M14	Monolingual	127	127	dook	deek	Mismatching	0.02	Dissimilar	Different	0	Correct
M14	Monolingual	128	45	bawp	bawp	Matching	0.92	Similar	Same	1	Correct
M14	Monolingual	129	101	bowp	bowp	Matching	0.11	Dissimilar	Same	1	Correct
M14	Monolingual	130	318	bowp	bipe	Mismatching	0.21	Dissimilar	Different	0	Correct
M14	Monolingual	131	150	dake	durk	Mismatching	0.88	Similar	Different	0	Correct
M14	Monolingual	132	212	dook	durk	Mismatching	0.95	Similar	Same	1	Incorrect
M14	Monolingual	133	21	fof	fof	Matching	0	Dissimilar	Same	1	Correct
M14	Monolingual	134	33	dake	dake	Matching	0.25	Dissimilar	Same	1	Correct
M14	Monolingual	135	151	dook	dake	Mismatching	0.25	Dissimilar	Different	0	Correct
M14	Monolingual	136	63	fof	fof	Matching	0.01	Dissimilar	Same	1	Correct
M14	Monolingual	137	174	bipe	bawp	Mismatching	1	Similar	Different	0	Correct
M14	Monolingual	138	97	bipe	bipe	Matching	1	Similar	Same	1	Correct
M14	Monolingual	139	307	fif	faf	Mismatching	0.47	Dissimilar	Different	0	Correct
M14	Monolingual	140	16	fof	fof	Matching	0.01	Dissimilar	Same	1	Correct
M14	Monolingual	141	29	dook	dook	Matching	0.02	Dissimilar	Same	1	Correct
M14	Monolingual	142	237	fuf	faf	Mismatching	0.47	Dissimilar	Same	1	Incorrect
M14	Monolingual	143	232	fuff	fif	Mismatching	0.99	Similar	Different	0	Correct
M14	Monolingual	144	296	barp	bowp	Mismatching	0.63	Similar	Different	0	Correct
M14	Monolingual	145	278	faf	fof	Mismatching	0.47	Dissimilar	Different	0	Correct
M14	Monolingual	146	152	dake	dook	Mismatching	0.88	Similar	Different	0	Correct
M14	Monolingual	147	305	bipe	bowp	Mismatching	0.21	Dissimilar	Different	0	Correct
M14	Monolingual	148	281	bope	barp	Mismatching	0.01	Dissimilar	Different	0	Correct
M14	Monolingual	149	35	fuff	fuff	Matching	0.95	Similar	Same	1	Correct
M14	Monolingual	150	138	deek	durk	Mismatching	1	Similar	Different	0	Correct
M14	Monolingual	151	137	fif	fuf	Mismatching	0	Dissimilar	Different	0	Correct
M14	Monolingual	152	9	bope	bope	Matching	0.01	Dissimilar	Different	0	Incorrect
M14	Monolingual	153	255	fuf	faf	Mismatching	0	Dissimilar	Different	0	Correct
M14	Monolingual	154	308	bope	bowp	Mismatching	0.64	Similar	Same	1	Incorrect
M14	Monolingual	155	116	bowp	barp	Mismatching	0.11	Dissimilar	Different	0	Correct
M14	Monolingual	156	40	deek	deek	Matching	1	Similar	Same	1	Correct
M14	Monolingual	157	31	dake	dake	Matching	0.88	Similar	Same	1	Correct
M14	Monolingual	158	149	bipe	bope	Mismatching	0.99	Similar	Different	0	Correct
M14	Monolingual	159	194	barp	bipe	Mismatching	1	Similar	Different	0	Correct
M14	Monolingual	160	183	fof	faf	Mismatching	0.01	Dissimilar	Different	0	Correct
M14	Monolingual	161	26	faf	faf	Matching	0.47	Dissimilar	Same	1	Correct
M14	Monolingual	162	316	bowp	bope	Mismatching	0.21	Dissimilar	Different	0	Correct
M14	Monolingual	163	136	durk	dake	Mismatching	0.95	Similar	Different	0	Correct
M14	Monolingual	164	314	fof	fuff	Mismatching	0	Dissimilar	Different	0	Correct
M14	Monolingual	165	228	deek	dook	Mismatching	1	Similar	Same	1	Incorrect
M14	Monolingual	166	172	fuf	fif	Mismatching	1	Similar	Different	0	Correct
M14	Monolingual	167	70	bawp	bawp	Matching	0.92	Similar	Different	0	Incorrect
M14	Monolingual	168	184	barp	bowp	Mismatching	0.21	Dissimilar	Different	0	Correct
M14	Monolingual	169	47	faf	faf	Matching	0.85	Similar	Same	1	Correct
M14	Monolingual	170	161	bope	barp	Mismatching	1	Similar	Different	0	Correct
M14	Monolingual	171	59	fuf	fuf	Matching	0	Dissimilar	Same	1	Correct
M14	Monolingual	172	78	bowp	bowp	Matching	0.11	Dissimilar	Same	1	Correct
M14	Monolingual	173	41	faf	faf	Matching	0.85	Similar	Same	1	Correct
M14	Monolingual	174	112	fuff	fuff	Matching	0.9	Similar	Same	1	Correct
M14	Monolingual	175	175	durk	dake	Mismatching	0.88	Similar	Different	0	Correct
M14	Monolingual	176	168	bipe	bope	Mismatching	0.64	Similar	Different	0	Correct
M14	Monolingual	177	290	fuff	fif	Mismatching	1	Similar	Different	0	Correct
M14	Monolingual	178	182	bipe	barp	Mismatching	0.63	Similar	Different	0	Correct
M14	Monolingual	179	141	faf	fif	Mismatching	0.85	Similar	Different	0	Correct
M14	Monolingual	180	80	faf	faf	Matching	0.85	Similar	Same	1	Correct
M14	Monolingual	181	256	bipe	barp	Mismatching	0.63	Similar	Different	0	Correct
M14	Monolingual	182	238	bipe	bawp	Mismatching	1	Similar	Different	0	Correct
M14	Monolingual	183	4	dook	dook	Matching	0.01	Dissimilar	Same	1	Correct
M14	Monolingual	184	142	fof	fuff	Mismatching	0	Dissimilar	Same	1	Incorrect
M14	Monolingual	185	313	fuf	fif	Mismatching	1	Similar	Different	0	Correct
M14	Monolingual	186	315	bipe	bope	Mismatching	0.99	Similar	Different	0	Correct
M14	Monolingual	187	28	bipe	bipe	Matching	0.99	Similar	Same	1	Correct
M14	Monolingual	188	306	fif	faf	Mismatching	0.99	Similar	Different	0	Correct
M14	Monolingual	189	159	fif	fuf	Mismatching	0.99	Similar	Different	0	Correct
M14	Monolingual	190	310	faf	fuff	Mismatching	0.85	Similar	Different	0	Correct
M14	Monolingual	191	57	bope	bope	Matching	0.01	Dissimilar	Different	0	Incorrect
M14	Monolingual	192	248	bowp	bope	Mismatching	0.01	Dissimilar	Different	0	Correct
M14	Monolingual	193	177	dake	deek	Mismatching	0.88	Similar	Different	0	Correct
M14	Monolingual	194	82	bipe	bipe	Matching	1	Similar	Same	1	Correct
M14	Monolingual	195	185	fif	fuff	Mismatching	1	Similar	Different	0	Correct
M14	Monolingual	196	120	bope	bowp	Mismatching	0.11	Dissimilar	Different	0	Correct
M14	Monolingual	197	268	faf	fuf	Mismatching	0.47	Dissimilar	Same	1	Incorrect
M14	Monolingual	198	55	fuff	fuff	Matching	0.9	Similar	Same	1	Correct
M14	Monolingual	199	5	fof	fof	Matching	0.01	Dissimilar	Same	1	Correct
M14	Monolingual	200	77	bawp	bawp	Matching	1	Similar	Same	1	Correct
M14	Monolingual	201	69	bawp	bawp	Matching	0.92	Similar	Same	1	Correct
M14	Monolingual	202	272	durk	deek	Mismatching	1	Similar	Different	0	Correct
M14	Monolingual	203	23	durk	durk	Matching	0.97	Similar	Same	1	Correct
M14	Monolingual	204	258	bawp	bope	Mismatching	1	Similar	Different	0	Correct
M14	Monolingual	205	130	fuff	fuf	Mismatching	0	Dissimilar	Same	1	Incorrect
M14	Monolingual	206	96	fuf	fuf	Matching	0	Dissimilar	Different	0	Incorrect
M14	Monolingual	207	244	faf	fif	Mismatching	1	Similar	Different	0	Correct
M14	Monolingual	208	108	durk	durk	Matching	0.95	Similar	Same	1	Correct
M14	Monolingual	209	140	bope	bipe	Mismatching	0.64	Similar	Different	0	Correct
M14	Monolingual	210	135	faf	fof	Mismatching	0.01	Dissimilar	Different	0	Correct
M14	Monolingual	211	11	barp	barp	Matching	1	Similar	Different	0	Incorrect
M14	Monolingual	212	264	dook	deek	Mismatching	1	Similar	Different	0	Correct
M14	Monolingual	213	176	faf	fuff	Mismatching	0.9	Similar	Different	0	Correct
M14	Monolingual	214	104	durk	durk	Matching	0.95	Similar	Same	1	Correct
M14	Monolingual	215	144	fif	fuf	Mismatching	0	Dissimilar	Different	0	Correct
M14	Monolingual	216	251	barp	bope	Mismatching	0.64	Similar	Different	0	Correct
M14	Monolingual	217	181	bawp	bipe	Mismatching	1	Similar	Different	0	Correct
M14	Monolingual	218	106	faf	faf	Matching	0.85	Similar	Same	1	Correct
M14	Monolingual	219	179	faf	fof	Mismatching	0	Dissimilar	Different	0	Correct
M14	Monolingual	220	76	barp	barp	Matching	1	Similar	Same	1	Correct
M14	Monolingual	221	34	fuf	fuf	Matching	0	Dissimilar	Same	1	Correct
M14	Monolingual	222	277	bope	bowp	Mismatching	0.11	Dissimilar	Different	0	Correct
M14	Monolingual	223	266	fof	fuf	Mismatching	0.01	Dissimilar	Same	1	Incorrect
M14	Monolingual	224	274	barp	bawp	Mismatching	0.92	Similar	Different	0	Correct
M14	Monolingual	225	160	bawp	bowp	Mismatching	0.92	Similar	Different	0	Correct
M14	Monolingual	226	115	fuff	fof	Mismatching	0.01	Dissimilar	Different	0	Correct
M14	Monolingual	227	187	fif	fuf	Mismatching	0.99	Similar	Different	0	Correct
M14	Monolingual	228	302	barp	bipe	Mismatching	0.63	Similar	Different	0	Correct
M14	Monolingual	229	200	faf	fuf	Mismatching	0	Dissimilar	Different	0	Correct
M14	Monolingual	230	133	bipe	bawp	Mismatching	1	Similar	Different	0	Correct
M14	Monolingual	231	92	dake	dake	Matching	0.88	Similar	Same	1	Correct
M14	Monolingual	232	44	deek	deek	Matching	1	Similar	Same	1	Correct
M14	Monolingual	233	189	fof	fuf	Mismatching	0.01	Dissimilar	Same	1	Incorrect
M14	Monolingual	234	197	fuf	fof	Mismatching	0.01	Dissimilar	Same	1	Incorrect
M14	Monolingual	235	202	fuf	fuff	Mismatching	0.95	Similar	Same	1	Incorrect
M14	Monolingual	236	32	bowp	bowp	Matching	0.11	Dissimilar	Same	1	Correct
M14	Monolingual	237	198	deek	durk	Mismatching	0.97	Similar	Different	0	Correct
M14	Monolingual	238	243	fuf	faf	Mismatching	0	Dissimilar	Different	0	Correct
M14	Monolingual	239	75	deek	deek	Matching	1	Similar	Same	1	Correct
M14	Monolingual	240	312	fuf	fuff	Mismatching	0.95	Similar	Different	0	Correct
M14	Monolingual	241	94	bowp	bowp	Matching	0.11	Dissimilar	Same	1	Correct
M14	Monolingual	242	166	bope	bipe	Mismatching	0.99	Similar	Different	0	Correct
M14	Monolingual	243	61	durk	durk	Matching	0.97	Similar	Same	1	Correct
M14	Monolingual	244	87	fof	fof	Matching	0	Dissimilar	Same	1	Correct
M14	Monolingual	245	113	bawp	bope	Mismatching	0.01	Dissimilar	Same	1	Incorrect
M14	Monolingual	246	65	dook	dook	Matching	0.01	Dissimilar	Same	1	Correct
M14	Monolingual	247	245	dake	durk	Mismatching	0.25	Dissimilar	Different	0	Correct
M14	Monolingual	248	273	bawp	bope	Mismatching	0.01	Dissimilar	Same	1	Incorrect
M14	Monolingual	249	257	fuff	fof	Mismatching	0.95	Similar	Same	1	Incorrect
M14	Monolingual	250	155	bawp	bowp	Mismatching	0.11	Dissimilar	Different	0	Correct
M14	Monolingual	251	107	fuf	fuf	Matching	0.01	Dissimilar	Different	0	Incorrect
M14	Monolingual	252	192	bowp	bipe	Mismatching	0.11	Dissimilar	Different	0	Correct
M14	Monolingual	253	320	fof	fuff	Mismatching	0.9	Similar	Same	1	Incorrect
M14	Monolingual	254	6	fif	fif	Matching	1	Similar	Same	1	Correct
M14	Monolingual	255	95	faf	faf	Matching	0.47	Dissimilar	Same	1	Correct
M14	Monolingual	256	51	deek	deek	Matching	1	Similar	Different	0	Incorrect
M14	Monolingual	257	234	dook	dake	Mismatching	0.01	Dissimilar	Different	0	Correct
M14	Monolingual	258	18	barp	barp	Matching	0.63	Similar	Different	0	Incorrect
M14	Monolingual	259	293	fof	fif	Mismatching	0.99	Similar	Different	0	Correct
M14	Monolingual	260	91	fif	fif	Matching	1	Similar	Same	1	Correct
M14	Monolingual	261	62	faf	faf	Matching	0.47	Dissimilar	Same	1	Correct
M14	Monolingual	262	265	bowp	bawp	Mismatching	0.11	Dissimilar	Different	0	Correct
M14	Monolingual	263	191	bawp	barp	Mismatching	1	Similar	Different	0	Correct
M14	Monolingual	264	301	bope	bawp	Mismatching	0.92	Similar	Different	0	Correct
M14	Monolingual	265	157	fof	fif	Mismatching	0.99	Similar	Different	0	Correct
M14	Monolingual	266	164	dake	deek	Mismatching	0.25	Dissimilar	Different	0	Correct
M14	Monolingual	267	220	bowp	bope	Mismatching	0.01	Dissimilar	Different	0	Correct
M14	Monolingual	268	39	deek	deek	Matching	1	Similar	Same	1	Correct
M14	Monolingual	269	221	fuf	fof	Mismatching	0.01	Dissimilar	Same	1	Incorrect
M14	Monolingual	270	241	dake	durk	Mismatching	0.95	Similar	Different	0	Correct
M14	Monolingual	271	42	bope	bope	Matching	0.64	Similar	Different	0	Incorrect
M14	Monolingual	272	72	deek	deek	Matching	1	Similar	Same	1	Correct
M14	Monolingual	273	38	dook	dook	Matching	0.01	Dissimilar	Same	1	Correct
M14	Monolingual	274	227	fif	fuff	Mismatching	0.95	Similar	Different	0	Correct
M14	Monolingual	275	209	dook	dake	Mismatching	0.25	Dissimilar	Different	0	Correct
M14	Monolingual	276	71	fuff	fuff	Matching	0.95	Similar	Same	1	Correct
M14	Monolingual	277	17	bope	bope	Matching	0.01	Dissimilar	Different	0	Incorrect
M14	Monolingual	278	84	dake	dake	Matching	0.25	Dissimilar	Same	1	Correct
M14	Monolingual	279	317	bowp	barp	Mismatching	0.21	Dissimilar	Different	0	Correct
M14	Monolingual	280	109	fif	fif	Matching	0.99	Similar	Same	1	Correct
M14	Monolingual	281	240	fif	fuff	Mismatching	1	Similar	Different	0	Correct
M14	Monolingual	282	206	fuf	fuff	Mismatching	0.01	Dissimilar	Same	1	Incorrect
M14	Monolingual	283	279	fif	fof	Mismatching	0.99	Similar	Different	0	Correct
M14	Monolingual	284	204	bawp	bipe	Mismatching	1	Similar	Different	0	Correct
M14	Monolingual	285	110	barp	barp	Matching	1	Similar	Same	1	Correct
M14	Monolingual	286	267	deek	dook	Mismatching	0.01	Dissimilar	Different	0	Correct
M14	Monolingual	287	37	fuf	fuf	Matching	0.01	Dissimilar	Different	0	Incorrect
M14	Monolingual	288	74	fif	fif	Matching	0.99	Similar	Same	1	Correct
M14	Monolingual	289	131	bope	barp	Mismatching	0.01	Dissimilar	Different	0	Correct
M14	Monolingual	290	100	bipe	bipe	Matching	1	Similar	Same	1	Correct
M14	Monolingual	291	54	bope	bope	Matching	0.64	Similar	Different	0	Incorrect
M14	Monolingual	292	213	deek	durk	Mismatching	0.97	Similar	Different	0	Correct
M14	Monolingual	293	126	dake	dook	Mismatching	0.02	Dissimilar	Different	0	Correct
M14	Monolingual	294	235	bawp	barp	Mismatching	1	Similar	Different	0	Correct
M14	Monolingual	295	298	bawp	bope	Mismatching	1	Similar	Different	0	Correct
M14	Monolingual	296	58	barp	barp	Matching	0.63	Similar	Same	1	Correct
M14	Monolingual	297	289	bowp	bawp	Mismatching	1	Similar	Different	0	Correct
M14	Monolingual	298	249	bawp	bowp	Mismatching	0.92	Similar	Different	0	Correct
M14	Monolingual	299	285	fof	fuf	Mismatching	0.01	Dissimilar	Same	1	Incorrect
M14	Monolingual	300	219	barp	bawp	Mismatching	0.63	Similar	Different	0	Correct
M14	Monolingual	301	259	bope	bipe	Mismatching	0.99	Similar	Different	0	Correct
M14	Monolingual	302	143	fuff	faf	Mismatching	0.95	Similar	Different	0	Correct
M14	Monolingual	303	260	dook	durk	Mismatching	0.01	Dissimilar	Different	0	Correct
M14	Monolingual	304	223	fof	faf	Mismatching	0.01	Dissimilar	Different	0	Correct
M14	Monolingual	305	98	fof	fof	Matching	0.01	Dissimilar	Different	0	Incorrect
M14	Monolingual	306	49	barp	barp	Matching	1	Similar	Different	0	Incorrect
M14	Monolingual	307	253	fuf	fof	Mismatching	0.01	Dissimilar	Same	1	Incorrect
M14	Monolingual	308	229	barp	bowp	Mismatching	0.11	Dissimilar	Different	0	Correct
M14	Monolingual	309	125	bope	bawp	Mismatching	0.92	Similar	Different	0	Correct
M14	Monolingual	310	148	fuff	fof	Mismatching	0	Dissimilar	Different	0	Correct
M14	Monolingual	311	300	barp	bope	Mismatching	1	Similar	Different	0	Correct
M14	Monolingual	312	283	barp	bawp	Mismatching	0.63	Similar	Different	0	Correct
M14	Monolingual	313	270	durk	dook	Mismatching	0.95	Similar	Different	0	Correct
M14	Monolingual	314	43	fif	fif	Matching	1	Similar	Same	1	Correct
M14	Monolingual	315	67	fuff	fuff	Matching	0.95	Similar	Same	1	Correct
M14	Monolingual	316	68	durk	durk	Matching	0.95	Similar	Same	1	Correct
M14	Monolingual	317	252	dook	dake	Mismatching	0.01	Dissimilar	Different	0	Correct
M14	Monolingual	318	167	barp	bawp	Mismatching	0.92	Similar	Different	0	Correct
M14	Monolingual	319	214	deek	dook	Mismatching	0.01	Dissimilar	Different	0	Correct
M14	Monolingual	320	195	bowp	bawp	Mismatching	0.92	Similar	Different	0	Correct
M15	Monolingual	1	12	fif	fif	Matching	0.99	Similar	Same	1	Correct
M15	Monolingual	2	115	fuff	fof	Mismatching	0.01	Dissimilar	Different	0	Correct
M15	Monolingual	3	15	bowp	bowp	Matching	0.21	Dissimilar	Same	1	Correct
M15	Monolingual	4	292	dook	deek	Mismatching	0.02	Dissimilar	Different	0	Correct
M15	Monolingual	5	17	bope	bope	Matching	0.01	Dissimilar	Different	0	Incorrect
M15	Monolingual	6	248	bowp	bope	Mismatching	0.01	Dissimilar	Different	0	Correct
M15	Monolingual	7	143	fuff	faf	Mismatching	0.95	Similar	Different	0	Correct
M15	Monolingual	8	4	dook	dook	Matching	0.01	Dissimilar	Different	0	Incorrect
M15	Monolingual	9	13	barp	barp	Matching	0.63	Similar	Same	1	Correct
M15	Monolingual	10	313	fuf	fif	Mismatching	1	Similar	Different	0	Correct
M15	Monolingual	11	68	durk	durk	Matching	0.95	Similar	Same	1	Correct
M15	Monolingual	12	97	bipe	bipe	Matching	1	Similar	Same	1	Correct
M15	Monolingual	13	243	fuf	faf	Mismatching	0	Dissimilar	Different	0	Correct
M15	Monolingual	14	317	bowp	barp	Mismatching	0.21	Dissimilar	Different	0	Correct
M15	Monolingual	15	86	bowp	bowp	Matching	0.21	Dissimilar	Same	1	Correct
M15	Monolingual	16	272	durk	deek	Mismatching	1	Similar	Different	0	Correct
M15	Monolingual	17	26	faf	faf	Matching	0.47	Dissimilar	Same	1	Correct
M15	Monolingual	18	152	dake	dook	Mismatching	0.88	Similar	Different	0	Correct
M15	Monolingual	19	281	bope	barp	Mismatching	0.01	Dissimilar	Different	0	Correct
M15	Monolingual	20	291	dake	deek	Mismatching	1	Similar	Different	0	Correct
M15	Monolingual	21	240	fif	fuff	Mismatching	1	Similar	Different	0	Correct
M15	Monolingual	22	210	bope	bawp	Mismatching	0.64	Similar	Different	0	Correct
M15	Monolingual	23	19	dake	dake	Matching	0.25	Dissimilar	Same	1	Correct
M15	Monolingual	24	156	bope	barp	Mismatching	1	Similar	Different	0	Correct
M15	Monolingual	25	125	bope	bawp	Mismatching	0.92	Similar	Same	1	Incorrect
M15	Monolingual	26	16	fof	fof	Matching	0.01	Dissimilar	Same	1	Correct
M15	Monolingual	27	161	bope	barp	Mismatching	1	Similar	Different	0	Correct
M15	Monolingual	28	80	faf	faf	Matching	0.85	Similar	Same	1	Correct
M15	Monolingual	29	76	barp	barp	Matching	1	Similar	Same	1	Correct
M15	Monolingual	30	228	deek	dook	Mismatching	1	Similar	Same	1	Incorrect
M15	Monolingual	31	118	durk	dook	Mismatching	0.02	Dissimilar	Different	0	Correct
M15	Monolingual	32	69	bawp	bawp	Matching	0.92	Similar	Same	1	Correct
M15	Monolingual	33	145	faf	fif	Mismatching	1	Similar	Different	0	Correct
M15	Monolingual	34	78	bowp	bowp	Matching	0.11	Dissimilar	Same	1	Correct
M15	Monolingual	35	184	barp	bowp	Mismatching	0.21	Dissimilar	Same	1	Incorrect
M15	Monolingual	36	298	bawp	bope	Mismatching	1	Similar	Different	0	Correct
M15	Monolingual	37	239	dook	deek	Mismatching	1	Similar	Different	0	Correct
M15	Monolingual	38	84	dake	dake	Matching	0.25	Dissimilar	Same	1	Correct
M15	Monolingual	39	280	bipe	barp	Mismatching	0.99	Similar	Different	0	Correct
M15	Monolingual	40	261	dake	dook	Mismatching	0.88	Similar	Different	0	Correct
M15	Monolingual	41	201	bowp	barp	Mismatching	1	Similar	Same	1	Incorrect
M15	Monolingual	42	314	fof	fuff	Mismatching	0	Dissimilar	Different	0	Correct
M15	Monolingual	43	285	fof	fuf	Mismatching	0.01	Dissimilar	Same	1	Incorrect
M15	Monolingual	44	177	dake	deek	Mismatching	0.88	Similar	Different	0	Correct
M15	Monolingual	45	56	fof	fof	Matching	0	Dissimilar	Same	1	Correct
M15	Monolingual	46	51	deek	deek	Matching	1	Similar	Same	1	Correct
M15	Monolingual	47	217	deek	durk	Mismatching	1	Similar	Different	0	Correct
M15	Monolingual	48	90	barp	barp	Matching	0.63	Similar	Same	1	Correct
M15	Monolingual	49	270	durk	dook	Mismatching	0.95	Similar	Different	0	Correct
M15	Monolingual	50	46	bope	bope	Matching	0.64	Similar	Same	1	Correct
M15	Monolingual	51	107	fuf	fuf	Matching	0.01	Dissimilar	Different	0	Incorrect
M15	Monolingual	52	95	faf	faf	Matching	0.47	Dissimilar	Same	1	Correct
M15	Monolingual	53	94	bowp	bowp	Matching	0.11	Dissimilar	Same	1	Correct
M15	Monolingual	54	71	fuff	fuff	Matching	0.95	Similar	Same	1	Correct
M15	Monolingual	55	302	barp	bipe	Mismatching	0.63	Similar	Different	0	Correct
M15	Monolingual	56	300	barp	bope	Mismatching	1	Similar	Different	0	Correct
M15	Monolingual	57	204	bawp	bipe	Mismatching	1	Similar	Different	0	Correct
M15	Monolingual	58	185	fif	fuff	Mismatching	1	Similar	Different	0	Correct
M15	Monolingual	59	50	deek	deek	Matching	1	Similar	Same	1	Correct
M15	Monolingual	60	246	fuff	faf	Mismatching	0.85	Similar	Different	0	Correct
M15	Monolingual	61	135	faf	fof	Mismatching	0.01	Dissimilar	Different	0	Correct
M15	Monolingual	62	113	bawp	bope	Mismatching	0.01	Dissimilar	Different	0	Correct
M15	Monolingual	63	30	dook	dook	Matching	0.02	Dissimilar	Same	1	Correct
M15	Monolingual	64	132	durk	dook	Mismatching	0.01	Dissimilar	Different	0	Correct
M15	Monolingual	65	65	dook	dook	Matching	0.01	Dissimilar	Same	1	Correct
M15	Monolingual	66	271	fof	faf	Mismatching	0.85	Similar	Different	0	Correct
M15	Monolingual	67	85	bowp	bowp	Matching	0.21	Dissimilar	Same	1	Correct
M15	Monolingual	68	57	bope	bope	Matching	0.01	Dissimilar	Same	1	Correct
M15	Monolingual	69	77	bawp	bawp	Matching	1	Similar	Same	1	Correct
M15	Monolingual	70	310	faf	fuff	Mismatching	0.85	Similar	Different	0	Correct
M15	Monolingual	71	66	fif	fif	Matching	1	Similar	Same	1	Correct
M15	Monolingual	72	190	durk	dake	Mismatching	0.25	Dissimilar	Different	0	Correct
M15	Monolingual	73	178	bowp	bipe	Mismatching	1	Similar	Different	0	Correct
M15	Monolingual	74	79	bope	bope	Matching	0.64	Similar	Same	1	Correct
M15	Monolingual	75	159	fif	fuf	Mismatching	0.99	Similar	Different	0	Correct
M15	Monolingual	76	283	barp	bawp	Mismatching	0.63	Similar	Different	0	Correct
M15	Monolingual	77	319	bipe	bowp	Mismatching	1	Similar	Different	0	Correct
M15	Monolingual	78	253	fuf	fof	Mismatching	0.01	Dissimilar	Different	0	Correct
M15	Monolingual	79	211	fuff	faf	Mismatching	0.9	Similar	Different	0	Correct
[truncated: 10,481 more rows]
